# Supplementary material
Source: publisher figshare collection journal article supplement (https://tandf.figshare.com/ndownloader/files/18714968)
Supplement: Supplementary file 1 [file 18714968]

## Sheet: Лист1
	128kHz	Experimental			Approx			128kHz	Experimental			Approx			128kHz	Experimental			Approx			90kHz	Experimental			Approx				Experimental			Approx				Experimental			Approx
TestLevel		20			20				0			20				-20			20				20			20				0			0				-20			-20
AlternLevel		20	0	-20	0	-20			20	0	-20	20	-20			20	0	-20	20	-20			20	0	-20	0	-20			20	0	-20	20	-20			20	0	-20	20	-20
	Time				τ=42ms	τ=63ms						τ=119ms	τ=109ms						τ=218ms	τ=126ms		Time				τ=42ms	τ=40ms						τ=168ms	τ=59ms						τ=171ms	τ=122ms
	2	4.66053	3.66524	1.90251					3.21971	2.02052	0.747852					3.60864	1.77806	0.351985				2									0.975935	0.7					0.82385	0.901943	0.409364
	2.02	4.66053	3.66524	1.90251					3.21971	2.02052	0.747852					3.60864	1.77806	0.351985				2.02									0.975935	0.7					0.82385	0.901943	0.409364
	2.0402	4.66053	3.66524	1.90251					3.21971	2.02052	0.747852					3.60864	1.77806	0.351985				2.0402	1.54193								0.975935	0.7					0.82385	0.901943	0.409364
	2.0606	4.66053	3.66524	1.90251					3.21971	2.02052	0.747852					3.60864	1.77806	0.351985				2.0606	1.54193								0.975935	0.7					0.82385	0.901943	0.409364
	2.08121	4.67309	3.71174	1.97658					3.12315	2.0278	0.75616					3.49564	1.72941	0.329659				2.08121	1.54709							0.989689	0.980531	0.8					0.799474	0.873086	0.404317
	2.10202	4.67309	3.71174	1.97658					3.12315	2.0278	0.75616					3.49564	1.72941	0.329659				2.10202	1.54709							0.989689	0.980531	0.8					0.799474	0.873086	0.404317
	2.12304	4.67309	3.71174	1.97658					3.12315	2.0278	0.75616					3.49564	1.72941	0.329659				2.12304	1.54709							0.989689	0.980531	0.8					0.799474	0.873086	0.404317
	2.14427	4.68045	3.78276	2.097					3.02378	2.03452	0.784549					3.3708	1.6772	0.328636				2.14427	1.54848	1.04015	0.791667					0.969428	0.990128	0.63092					0.77502	0.847255	0.403705
	2.16571	4.68045	3.78276	2.097					3.02378	2.03452	0.784549					3.3708	1.6772	0.328636				2.16571	1.54848	1.04015	0.791667					0.969428	0.990128	0.63092					0.77502	0.847255	0.403705
	2.18737	4.68045	3.78276	2.097					3.02378	2.03452	0.784549					3.3708	1.6772	0.328636				2.18737	1.54848	1.04015	0.791667					0.969428	0.990128	0.63092					0.77502	0.847255	0.403705
	2.20924	4.68105	3.88755	2.23912					2.91661	2.04007	0.834538					3.23033	1.61982	0.325026				2.20924	1.54324	1.04225	0.84174					0.946408	0.995314	0.625317					0.74937	0.823739	0.397707
	2.23134	4.68105	3.88755	2.23912					2.91661	2.04007	0.834538					3.23033	1.61982	0.325026				2.23134	1.54324	1.04225	0.84174					0.946408	0.995314	0.625317					0.74937	0.823739	0.397707
	2.25365	4.68354	4.00933	2.37558					2.80235	2.04973	0.893215					3.0808	1.55886	0.327408				2.25365	1.54247	1.06656	0.883706					0.919409	0.991939	0.638363					0.722544	0.80016	0.385938
	2.27619	4.68354	4.00933	2.37558					2.80235	2.04973	0.893215					3.0808	1.55886	0.327408				2.27619	1.54247	1.06656	0.883706					0.919409	0.991939	0.638363					0.722544	0.80016	0.385938
	2.29895	4.68354	4.00933	2.37558					2.80235	2.04973	0.893215					3.0808	1.55886	0.327408				2.29895	1.54247	1.06656	0.883706					0.919409	0.991939	0.638363					0.722544	0.80016	0.385938
	2.32194	4.69425	4.13318	2.49357					2.68571	2.06264	0.951047					2.93231	1.49755	0.335712				2.32194	1.54939	1.09816	0.91653					0.888267	0.985676	0.661764					0.69446	0.773627	0.37384
	2.34516	4.69425	4.13318	2.49357					2.68571	2.06264	0.951047					2.93231	1.49755	0.335712				2.34516	1.54939	1.09816	0.91653					0.888267	0.985676	0.661764					0.69446	0.773627	0.37384
	2.36861	4.69425	4.13318	2.49357					2.68571	2.06264	0.951047					2.93231	1.49755	0.335712				2.36861	1.54939	1.09816	0.91653					0.888267	0.985676	0.661764					0.69446	0.773627	0.37384
	2.39229	4.70336	4.24626	2.58663					2.57293	2.07424	1.00189					2.7937	1.43928	0.34643				2.39229	1.55954	1.1275	0.941185					0.85476	0.980878	0.691113					0.666264	0.743537	0.363372
	2.41622	4.70336	4.24626	2.58663					2.57293	2.07424	1.00189					2.7937	1.43928	0.34643				2.41622	1.55954	1.1275	0.941185					0.85476	0.980878	0.691113					0.666264	0.743537	0.363372
	2.44038	4.69965	4.34187	2.66244					2.46938	2.07951	1.04401					2.66962	1.38542	0.350005				2.44038	1.56004	1.14887	0.961422					0.821898	0.977051	0.721236					0.640339	0.712318	0.35083
	2.46478	4.69965	4.34187	2.66244					2.46938	2.07951	1.04401					2.66962	1.38542	0.350005				2.46478	1.56004	1.14887	0.961422					0.821898	0.977051	0.721236					0.640339	0.712318	0.35083
	2.48943	4.69965	4.34187	2.66244					2.46938	2.07951	1.04401					2.66962	1.38542	0.350005				2.48943	1.56004	1.14887	0.961422					0.821898	0.977051	0.721236					0.640339	0.712318	0.35083
	2.51433	4.6854	4.42543	2.74393					2.37556	2.08364	1.08084					2.55749	1.33387	0.351832				2.51433	1.55561	1.16062	0.983787					0.790962	0.968623	0.745685					0.617372	0.682802	0.331556
	2.53947	4.6854	4.42543	2.74393					2.37556	2.08364	1.08084					2.55749	1.33387	0.351832				2.53947	1.55561	1.16062	0.983787					0.790962	0.968623	0.745685					0.617372	0.682802	0.331556
	2.56486	4.67336	4.51226	2.85569					2.28715	2.08877	1.12093					2.44972	1.28195	0.362806				2.56486	1.55953	1.16743	1.01415					0.76167	0.956106	0.762237					0.59654	0.656423	0.317162
	2.59051	4.67336	4.51226	2.85569					2.28715	2.08877	1.12093					2.44972	1.28195	0.362806				2.59051	1.55953	1.16743	1.01415					0.76167	0.956106	0.762237					0.59654	0.656423	0.317162
	2.61642	4.67336	4.51226	2.85569					2.28715	2.08877	1.12093					2.44972	1.28195	0.362806				2.61642	1.55953	1.16743	1.01415					0.76167	0.956106	0.762237					0.59654	0.656423	0.317162
	2.64258	4.66772	4.61749	3.00385					2.19824	2.09398	1.1729					2.33765	1.22818	0.3774				2.64258	1.56876	1.1788	1.05286					0.733209	0.946503	0.775908					0.576527	0.633737	0.313746
	2.66901	4.66772	4.61749	3.00385					2.19824	2.09398	1.1729					2.33765	1.22818	0.3774				2.66901	1.56876	1.1788	1.05286					0.733209	0.946503	0.775908					0.576527	0.633737	0.313746
	2.6957	4.66419	4.74641	3.17347					2.10368	2.09883	1.23862					2.21426	1.17104	0.389705				2.6957	1.5761	1.20188	1.09595					0.704	0.942148	0.794246					0.555964	0.613799	0.314942
	2.72265	4.66419	4.74641	3.17347					2.10368	2.09883	1.23862					2.21426	1.17104	0.389705				2.72265	1.5761	1.20188	1.09595					0.704	0.942148	0.794246					0.555964	0.613799	0.314942
	2.74988	4.66419	4.74641	3.17347					2.10368	2.09883	1.23862					2.21426	1.17104	0.389705				2.74988	1.5761	1.20188	1.09595					0.704	0.942148	0.794246					0.555964	0.613799	0.314942
	2.77738	4.66051	4.89292	3.34468					2.00181	2.10278	1.31339					2.07949	1.11133	0.399446				2.77738	1.58039	1.23735	1.13849					0.672841	0.940164	0.823142					0.534205	0.594146	0.316067
	2.80515	4.66051	4.89292	3.34468					2.00181	2.10278	1.31339					2.07949	1.11133	0.399446				2.80515	1.58039	1.23735	1.13849					0.672841	0.940164	0.823142					0.534205	0.594146	0.316067
	2.83321	4.65598	5.04341	3.50251					1.89688	2.10557	1.38985					1.94269	1.05317	0.407318				2.83321	1.58183	1.28112	1.1754					0.640228	0.938704	0.865143					0.511833	0.573002	0.316404
	2.86154	4.65598	5.04341	3.50251					1.89688	2.10557	1.38985					1.94269	1.05317	0.407318				2.86154	1.58183	1.28112	1.1754					0.640228	0.938704	0.865143					0.511833	0.573002	0.316404
	2.89015	4.64938	5.18255	3.63867					1.79678	2.10787	1.46036					1.81665	1.00015	0.413896				2.89015	1.58195	1.32576	1.20467					0.608227	0.937785	0.916374					0.490681	0.549605	0.315847
	2.91905	4.64938	5.18255	3.63867					1.79678	2.10787	1.46036					1.81665	1.00015	0.413896				2.91905	1.58195	1.32576	1.20467					0.608227	0.937785	0.916374					0.490681	0.549605	0.315847
	2.94825	4.6399	5.30442	3.75582					1.70825	2.11058	1.5216					1.70979	0.953305	0.419291				2.94825	1.58184	1.36418	1.22884					0.57895	0.93705	0.96863					0.471898	0.524166	0.313265
	2.97773	4.6399	5.30442	3.75582					1.70825	2.11058	1.5216					1.70979	0.953305	0.419291				2.97773	1.58184	1.36418	1.22884					0.57895	0.93705	0.96863					0.471898	0.524166	0.313265
	3.0075	4.62881	5.41691	3.86976					1.63284	2.11393	1.57702					1.62057	0.911348	0.424523				3.0075	1.58237	1.39385	1.25381					0.553635	0.934398	1.01663					0.455383	0.498949	0.308603
	3.03758	4.62881	5.41691	3.86976					1.63284	2.11393	1.57702					1.62057	0.911348	0.424523				3.03758	1.58237	1.39385	1.25381					0.553635	0.934398	1.01663					0.455383	0.498949	0.308603
	3.06796	4.61923	5.53195	4.00144					1.5658	2.1182	1.63175					1.53724	0.870178	0.430671				3.06796	1.58504	1.41756	1.28219					0.532232	0.929485	1.05849					0.440005	0.477057	0.304829
	3.09864	4.61923	5.53195	4.00144					1.5658	2.1182	1.63175					1.53724	0.870178	0.430671				3.09864	1.58504	1.41756	1.28219					0.532232	0.929485	1.05849					0.440005	0.477057	0.304829
	3.12962	4.6144	5.65865	4.16356					1.49933	2.12315	1.69103					1.44747	0.825534	0.437166				3.12962	1.5891	1.44042	1.31175					0.512613	0.924512	1.09315					0.423864	0.459525	0.304191
	3.16092	4.6144	5.65865	4.16356					1.49933	2.12315	1.69103					1.44747	0.825534	0.437166				3.16092	1.5891	1.44042	1.31175					0.512613	0.924512	1.09315					0.423864	0.459525	0.304191
	3.19253	4.61464	5.80193	4.3516					1.42845	2.12743	1.75975					1.34765	0.777712	0.44413				3.19253	1.59318	1.46558	1.34264					0.492119	0.92109	1.12297					0.405609	0.445219	0.306493
	3.22445	4.61464	5.80193	4.3516					1.42845	2.12743	1.75975					1.34765	0.777712	0.44413				3.22445	1.59318	1.46558	1.34264					0.492119	0.92109	1.12297					0.405609	0.445219	0.306493
	3.2567	4.61758	5.95931	4.54641					1.35375	2.13013	1.83649					1.24377	0.72996	0.452069				3.2567	1.59645	1.49512	1.37426					0.469637	0.919914	1.15423					0.385694	0.432075	0.310904
	3.28926	4.61758	5.95931	4.54641					1.35375	2.13013	1.83649					1.24377	0.72996	0.452069				3.28926	1.59645	1.49512	1.37426					0.469637	0.919914	1.15423					0.385694	0.432075	0.310904
	3.32216	4.61989	6.121	4.72728					1.28006	2.13077	1.91468					1.14619	0.685327	0.459374				3.32216	1.5972	1.52824	1.40552					0.445254	0.92157	1.19187					0.365925	0.417886	0.316003
	3.35538	4.61989	6.121	4.72728					1.28006	2.13077	1.91468					1.14619	0.685327	0.459374				3.35538	1.5972	1.52824	1.40552					0.445254	0.92157	1.19187					0.365925	0.417886	0.316003
	3.38893	4.61924	6.27598	4.88647					1.2139	2.12989	1.98945					1.06372	0.64671	0.464519				3.38893	1.59418	1.56138	1.43828					0.420572	0.925347	1.23693					0.347665	0.40188	0.320439
	3.42282	4.61924	6.27598	4.88647					1.2139	2.12989	1.98945					1.06372	0.64671	0.464519				3.42282	1.59418	1.56138	1.43828					0.420572	0.925347	1.23693					0.347665	0.40188	0.320439
	3.45705	4.61725	6.41872	5.03446					1.1597	2.12981	2.05863					0.998306	0.614995	0.467937				3.45705	1.58837	1.59151	1.47513					0.397939	0.929683	1.28601					0.33244	0.384895	0.323659
	3.49162	4.61725	6.41872	5.03446					1.1597	2.12981	2.05863					0.998306	0.614995	0.467937				3.49162	1.58837	1.59151	1.47513					0.397939	0.929683	1.28601					0.33244	0.384895	0.323659
	3.52654	4.61608	6.55339	5.19373					1.11646	2.13219	2.12433					0.944335	0.587472	0.469726				3.52654	1.58168	1.61788	1.51781					0.377824	0.933486	1.33242					0.321442	0.368763	0.3258
	3.5618	4.61608	6.55339	5.19373					1.11646	2.13219	2.12433					0.944335	0.587472	0.469726				3.5618	1.58168	1.61788	1.51781					0.377824	0.933486	1.33242					0.321442	0.368763	0.3258
	3.59742	4.61516	6.6914	5.38143					1.07884	2.1367	2.19385					0.893256	0.560458	0.469719				3.59742	1.57467	1.64316	1.56647					0.35993	0.935803	1.37231					0.313023	0.355242	0.32698
	3.63339	4.61461	6.84258	5.59304					1.04104	2.14267	2.27306					0.837913	0.531692	0.469018				3.63339	1.56752	1.6724	1.61838					0.343613	0.937079	1.40751					0.304641	0.344837	0.326651
	3.66973	4.61461	6.84258	5.59304					1.04104	2.14267	2.27306					0.837913	0.531692	0.469018				3.66973	1.56752	1.6724	1.61838					0.343613	0.937079	1.40751					0.304641	0.344837	0.326651
	3.70642	4.61494	7.00806	5.80823					0.999348	2.14941	2.36092					0.774989	0.500197	0.468152				3.70642	1.56072	1.70855	1.66979					0.327165	0.938551	1.44249					0.294367	0.337006	0.324467
	3.74349	4.61494	7.00806	5.80823					0.999348	2.14941	2.36092					0.774989	0.500197	0.468152				3.74349	1.56072	1.70855	1.66979					0.327165	0.938551	1.44249					0.294367	0.337006	0.324467
	3.78092	4.61544	7.18079	6.01084					0.953604	2.15493	2.45209					0.706343	0.467511	0.466824				3.78092	1.5535	1.75037	1.71812					0.309185	0.939992	1.48231					0.281634	0.330193	0.320644
	3.81873	4.61553	7.34887	6.19536					0.907562	2.15836	2.54029					0.638988	0.437757	0.465754				3.81873	1.54518	1.79406	1.76212					0.290107	0.940902	1.5293					0.267815	0.323187	0.31661
	3.85692	4.61553	7.34887	6.19536					0.907562	2.15836	2.54029					0.638988	0.437757	0.465754				3.85692	1.54518	1.79406	1.76212					0.290107	0.940902	1.5293					0.267815	0.323187	0.31661
	3.89549	4.61501	7.50159	6.36157					0.865606	2.1606	2.62044					0.5807	0.413201	0.465338				3.89549	1.53603	1.83496	1.80312					0.271544	0.942098	1.57958					0.254317	0.314931	0.314582
	3.93444	4.61501	7.50159	6.36157					0.865606	2.1606	2.62044					0.5807	0.413201	0.465338				3.93444	1.53603	1.83496	1.80312					0.271544	0.942098	1.57958					0.254317	0.314931	0.314582
	3.97379	4.6132	7.63827	6.51637					0.830652	2.16222	2.69218					0.535878	0.393315	0.464779				3.97379	1.52607	1.87035	1.84453					0.254724	0.944521	1.62741					0.241727	0.304848	0.314543
	4.01353	4.61041	7.76814	6.67584					0.803901	2.16401	2.7602					0.503634	0.376834	0.464233				4.01353	1.51559	1.90132	1.88897					0.241195	0.947274	1.6708					0.230951	0.295133	0.314798
	4.05366	4.61041	7.76814	6.67584					0.803901	2.16401	2.7602					0.503634	0.376834	0.464233				4.05366	1.51559	1.90132	1.88897					0.241195	0.947274	1.6708					0.230951	0.295133	0.314798
	4.0942	4.60833	7.90115	6.85529					0.78329	2.1674	2.82933					0.477573	0.361353	0.464303				4.0942	1.50589	1.93089	1.93768					0.232424	0.948892	1.71011					0.222927	0.288354	0.3148
	4.13514	4.60848	8.04366	7.05803					0.763856	2.17245	2.90345					0.450199	0.344651	0.464363				4.13514	1.49744	1.96314	1.98954					0.227524	0.950088	1.74607					0.216114	0.283978	0.3146
	4.17649	4.60848	8.04366	7.05803					0.763856	2.17245	2.90345					0.450199	0.344651	0.464363				4.17649	1.49744	1.96314	1.98954					0.227524	0.950088	1.74607					0.216114	0.283978	0.3146
	4.21826	4.61131	8.19673	7.27081					0.741871	2.17856	2.98458					0.417783	0.326863	0.463975				4.21826	1.49015	2.0018	2.04043					0.224624	0.951526	1.7818					0.208173	0.280613	0.314009
	4.26044	4.61538	8.35366	7.46988					0.716505	2.18528	3.06873					0.380776	0.309296	0.463563				4.26044	1.48428	2.0461	2.08608					0.221955	0.952924	1.82106					0.199273	0.277254	0.313716
	4.30304	4.61538	8.35366	7.46988					0.716505	2.18528	3.06873					0.380776	0.309296	0.463563				4.30304	1.48428	2.0461	2.08608					0.221955	0.952924	1.82106					0.199273	0.277254	0.313716
	4.34607	4.61757	8.50374	7.63716					0.68823	2.19108	3.14855					0.341636	0.292889	0.462625				4.34607	1.47911	2.09135	2.12549					0.217804	0.954793	1.86595					0.189856	0.272398	0.313918
	4.38954	4.61653	8.63804	7.77264					0.659582	2.19532	3.21951					0.304817	0.279201	0.461651				4.38954	1.47343	2.13245	2.16086					0.21188	0.956829	1.91633					0.179538	0.266615	0.313751
	4.43343	4.61653	8.63804	7.77264					0.659582	2.19532	3.21951					0.304817	0.279201	0.461651				4.43343	1.47343	2.13245	2.16086					0.21188	0.956829	1.91633					0.179538	0.266615	0.313751
	4.47776	4.61452	8.75415	7.89471					0.635172	2.19903	3.28088					0.275614	0.269797	0.461574				4.47776	1.46756	2.16603	2.19474					0.205241	0.957283	1.96734					0.169664	0.261929	0.313863
	4.52254	4.61344	8.85875	8.02892					0.617433	2.20231	3.33604					0.255514	0.263478	0.461169				4.52254	1.46234	2.19238	2.22939					0.199062	0.955107	2.01152					0.161199	0.258429	0.314764
	4.56777	4.61328	8.96371	8.18881					0.605351	2.20431	3.3919					0.24225	0.258422	0.459476				4.56777	1.45724	2.21616	2.26482					0.194584	0.950895	2.04593					0.154018	0.255907	0.315686
	4.61345	4.61328	8.96371	8.18881					0.605351	2.20431	3.3919					0.24225	0.258422	0.459476				4.61345	1.45724	2.21616	2.26482					0.194584	0.950895	2.04593					0.154018	0.255907	0.315686
	4.65958	4.61448	9.07705	8.36435					0.596639	2.20558	3.45308					0.231917	0.253767	0.457406				4.65958	1.45186	2.24283	2.29764					0.19238	0.946656	2.07461					0.148436	0.254529	0.316426
	4.70618	4.61743	9.19666	8.53269					0.58809	2.20681	3.51741					0.220295	0.248607	0.45508				4.70618	1.44665	2.27348	2.32535					0.191655	0.943844	2.10356					0.144271	0.253646	0.317624
	4.75324	4.62135	9.31223	8.67568					0.577673	2.20731	3.57913					0.206199	0.242859	0.452056				4.75324	1.44149	2.30558	2.34843					0.190911	0.942582	2.1373					0.140239	0.252859	0.319643
	4.80077	4.62135	9.31223	8.67568					0.577673	2.20731	3.57913					0.206199	0.242859	0.452056				4.80077	1.44149	2.30558	2.34843					0.190911	0.942582	2.1373					0.140239	0.252859	0.319643
	4.84878	4.62572	9.41191	8.78677					0.566003	2.20735	3.63291					0.19189	0.237657	0.449317				4.84878	1.43613	2.33559	2.36826					0.189361	0.942433	2.1761					0.136638	0.252838	0.322279
	4.89727	4.62989	9.48863	8.87162					0.553787	2.20783	3.67613					0.178411	0.233555	0.446976				4.89727	1.43157	2.35956	2.38717					0.187256	0.94366	2.21444					0.134838	0.253087	0.32559
	4.94624	4.63228	9.54592	8.94861					0.541376	2.20864	3.71165					0.165962	0.22997	0.443848				4.94624	1.42855	2.37599	2.40834					0.185327	0.946011	2.24722					0.134339	0.251804	0.328707
	4.9957	4.63228	9.54592	8.94861					0.541376	2.20864	3.71165					0.165962	0.22997	0.443848				4.9957	1.42855	2.37599	2.40834					0.185327	0.946011	2.24722					0.134339	0.251804	0.328707
	5.04566	4.63273	9.59602	9.04099					0.530132	2.21017	3.74553					0.156188	0.227153	0.440347				5.04566	1.42634	2.38835	2.43181					0.184554	0.94751	2.27358					0.134847	0.249306	0.330889
	5.09611	4.63337	9.64918	9.15871					0.520565	2.21312	3.78211					0.149295	0.225305	0.437473				5.09611	1.42473	2.40119	2.45341					0.185841	0.946775	2.29463					0.136459	0.247365	0.333567
	5.14708	4.63611	9.70869	9.28742					0.511686	2.2165	3.82372					0.143764	0.223481	0.435225				5.14708	1.42407	2.41741	2.46947					0.189196	0.94408	2.31232					0.138383	0.246469	0.337037
	5.19855	4.6411	9.77069	9.39825					0.503579	2.21853	3.86873					0.139261	0.221168	0.43373				5.19855	1.424	2.4373	2.47943					0.19409	0.940572	2.33014					0.139971	0.247244	0.339929
	5.25053	4.64661	9.82584	9.47652					0.495793	2.21851	3.90975					0.135389	0.218253	0.432716				5.25053	1.42354	2.4571	2.48474					0.199668	0.937738	2.35075					0.141769	0.249927	0.34239
	5.30304	4.64661	9.82584	9.47652					0.495793	2.21851	3.90975					0.135389	0.218253	0.432716				5.30304	1.42354	2.4571	2.48474					0.199668	0.937738	2.35075					0.141769	0.249927	0.34239
	5.35607	4.64988	9.86697	9.53405					0.487124	2.21606	3.93956					0.130959	0.214318	0.431202				5.35607	1.42189	2.47272	2.48817					0.204286	0.937016	2.37352					0.145473	0.252384	0.344467
	5.40963	4.64992	9.8938	9.58919					0.478084	2.21176	3.95779					0.126878	0.209677	0.429492				5.40963	1.41909	2.48287	2.49216					0.207073	0.93839	2.39553					0.151384	0.253094	0.345159
	5.46372	4.64947	9.91154	9.65023					0.46957	2.20793	3.96984					0.124618	0.205455	0.428502				5.46372	1.41683	2.48849	2.49746					0.208785	0.940492	2.41391					0.158384	0.25275	0.343762
	5.51836	4.65045	9.92823	9.71908					0.461172	2.20604	3.98282					0.123389	0.201878	0.42815				5.51836	1.41616	2.49183	2.50418					0.209683	0.942918	2.42677					0.165838	0.251828	0.340926
	5.57354	4.65144	9.95059	9.79645					0.452425	2.20543	4.00175					0.122553	0.198166	0.428345				5.57354	1.41704	2.49578	2.51214					0.209477	0.945189	2.43477					0.173339	0.250676	0.338318
	5.62928	4.6525	9.97988	9.87958					0.443176	2.2057	4.02638					0.122386	0.193938	0.429379				5.62928	1.41994	2.50229	2.52012					0.208765	0.945943	2.44137					0.180447	0.250598	0.336599
	5.68557	4.6525	9.97988	9.87958					0.443176	2.2057	4.02638					0.122386	0.193938	0.429379				5.68557	1.41994	2.50229	2.52012					0.208765	0.945943	2.44137					0.180447	0.250598	0.336599
	5.74243	4.65457	10.0115	9.962					0.432673	2.20646	4.05174					0.122318	0.188763	0.430558				5.74243	1.42426	2.51059	2.52737					0.207872	0.945353	2.44924					0.187899	0.25104	0.336099
	5.79985	4.65691	10.0398	10.0376					0.421214	2.20592	4.07327					0.121534	0.182059	0.431526				5.79985	1.42859	2.51854	2.53389					0.207168	0.944436	2.45929					0.195826	0.25046	0.336543
	5.85785	4.6577	10.0609	10.1039					0.410508	2.20383	4.08874					0.120189	0.174985	0.432771				5.85785	1.43178	2.52531	2.53868					0.207338	0.943801	2.47091					0.203079	0.24964	0.337324
	5.91643	4.65558	10.0729	10.161					0.400925	2.2009	4.09732					0.118486	0.168692	0.43436				5.91643	1.4339	2.52998	2.54061					0.208522	0.944334	2.48101					0.210061	0.24848	0.339405
	5.97559	4.65066	10.0763	10.2063					0.392326	2.1969	4.10123					0.116552	0.162703	0.436115				5.97559	1.43534	2.53134	2.53997					0.210136	0.945587	2.48724					0.217177	0.246162	0.341803
	6.03535	4.64435	10.0741	10.2358					0.385641	2.19271	4.10382					0.115237	0.157233	0.437524				6.03535	1.43629	2.53035	2.53718					0.212355	0.945187	2.48991					0.223252	0.244152	0.342894
	6.0957	4.63865	10.0683	10.2549					0.380497	2.18923	4.10654					0.115303	0.152374	0.437585				6.0957	1.43823	2.52774	2.53341					0.215907	0.942329	2.48962					0.228332	0.24316	0.343751
	6.15666	4.63609	10.0608	10.2814					0.375921	2.18571	4.10997					0.116698	0.147117	0.435966				6.15666	1.44181	2.52416	2.53072					0.220672	0.939125	2.48709					0.23331	0.241946	0.344428
	6.21823	4.63815	10.0536	10.3271					0.37176	2.18132	4.11438					0.118505	0.141338	0.433741				6.21823	1.44694	2.52044	2.52958					0.226697	0.937497	2.48363					0.237869	0.240642	0.343932
	6.28041	4.64342	10.0453	10.3816					0.366756	2.17558	4.11864					0.119622	0.135539	0.431886				6.28041	1.45356	2.51564	2.53028					0.233456	0.937832	2.4796					0.242145	0.239501	0.343864
	6.34321	4.64826	10.0341	10.4266					0.359995	2.16844	4.12181					0.119978	0.129564	0.43022				6.34321	1.45929	2.50926	2.53263					0.239094	0.939835	2.47552					0.246298	0.23748	0.346202
	6.40665	4.65031	10.0199	10.454					0.353451	2.1615	4.12433					0.119834	0.124014	0.428837				6.40665	1.46167	2.5021	2.53464					0.242509	0.941971	2.47232					0.249196	0.235122	0.351034
	6.47071	4.65085	10.0041	10.4688					0.348757	2.15633	4.12627					0.119039	0.119596	0.428612				6.47071	1.46231	2.49447	2.53449					0.243862	0.942456	2.46922					0.250865	0.233312	0.358324
	6.53542	4.65158	9.98764	10.4793					0.345197	2.15234	4.128					0.117555	0.11547	0.429306				6.53542	1.46292	2.48607	2.53293					0.243421	0.941471	2.46456					0.252638	0.231197	0.366673
	6.60077	4.65189	9.97118	10.489					0.343137	2.14848	4.13083					0.116062	0.111312	0.430144				6.60077	1.46305	2.47751	2.53159					0.241805	0.939937	2.45812					0.254731	0.228518	0.37389
	6.66678	4.65194	9.95428	10.4961					0.343199	2.14409	4.13422					0.114858	0.107545	0.431117				6.66678	1.46399	2.46903	2.52984					0.239846	0.938215	2.45094					0.256797	0.225969	0.379399
	6.73345	4.65279	9.93475	10.4986					0.344018	2.13853	4.13602					0.113901	0.103955	0.431634				6.73345	1.46735	2.45948	2.52676					0.237484	0.936999	2.44386					0.258766	0.22335	0.383217
	6.80078	4.65505	9.91074	10.4972					0.344731	2.13196	4.13529					0.113278	0.100377	0.431323				6.80078	1.47185	2.4479	2.52294					0.235032	0.936588	2.43708					0.259637	0.220813	0.385742
	6.86879	4.65872	9.8825	10.4923					0.345806	2.12546	4.13215					0.112635	0.097126	0.430978				6.86879	1.47538	2.43446	2.51933					0.233821	0.936216	2.43017					0.257946	0.21927	0.388136
	6.93748	4.6626	9.85185	10.4838					0.346735	2.11924	4.12765					0.111737	0.093889	0.430689				6.93748	1.47737	2.41949	2.51668					0.234135	0.936092	2.42178					0.253748	0.21775	0.391184
	7.00685	4.66653	9.79419	10.468					0.347029	2.10828	4.12221					0.110273	0.0869964	0.430401				7.00685	1.47659	2.39019	2.51657					0.236135	0.934314	2.40071					0.23997	0.211834	0.398211
	7.07692	4.66729	9.76994	10.4668					0.347781	2.1047	4.1224					0.109342	0.0842113	0.431605				7.07692	1.47615	2.37859	2.5175					0.238431	0.931525	2.39084					0.231111	0.208577	0.403588
	7.14769	4.66963	9.74601	10.4675					0.349165	2.10162	4.1241					0.108423	0.0820072	0.433269				7.14769	1.47753	2.3678	2.51898					0.241155	0.92869	2.38161					0.222544	0.204724	0.40933
	7.21917	4.67447	9.72161	10.4662					0.351601	2.09823	4.12587					0.107548	0.0805046	0.43503				7.21917	1.48116	2.3576	2.52191					0.24399	0.925471	2.37334					0.214783	0.200986	0.414371
	7.29136	4.68096	9.6946	10.457					0.354596	2.09515	4.12471					0.106293	0.0791304	0.437116				7.29136	1.48629	2.34768	2.52405					0.246689	0.922326	2.36648					0.208439	0.197414	0.418836
	7.36427	4.68636	9.66215	10.4374					0.357257	2.09234	4.11921					0.10497	0.077564	0.439269				7.36427	1.49105	2.33596	2.52448					0.247725	0.920344	2.36034					0.204413	0.192356	0.422857
	7.43792	4.68892	9.58692	10.3942					0.363802	2.08763	4.10323					0.105182	0.0742853	0.440918				7.43792	1.49758	2.30634	2.5213					0.244732	0.915273	2.34461					0.19837	0.180828	0.425207
	7.5123	4.69238	9.5539	10.3867					0.367972	2.08569	4.09719					0.107136	0.0728053	0.439472				7.5123	1.50115	2.29179	2.51884					0.241999	0.910632	2.33266					0.195429	0.176603	0.424183
	7.58742	4.69772	9.52849	10.387					0.372308	2.08357	4.09381					0.110104	0.071763	0.436499				7.58742	1.50427	2.27929	2.51681					0.239592	0.904542	2.31982					0.192729	0.17332	0.423822
	7.66329	4.70417	9.50876	10.3843					0.376897	2.08175	4.09148					0.113312	0.0714499	0.432668				7.66329	1.50684	2.26909	2.51476					0.237586	0.898151	2.30981					0.190079	0.170643	0.424572
	7.73993	4.71253	9.48904	10.3722					0.381373	2.0804	4.08681					0.116091	0.072103	0.428619				7.73993	1.51013	2.25994	2.51244					0.234991	0.892077	2.30476					0.188395	0.166925	0.426885
	7.81733	4.73455	9.43296	10.3319					0.390181	2.07754	4.06766					0.122191	0.0751713	0.42151				7.81733	1.51782	2.23757	2.51039					0.230542	0.879971	2.30467					0.189652	0.155094	0.433373
	7.8955	4.74627	9.39765	10.3109					0.394508	2.0771	4.05619					0.12488	0.0768616	0.418378				7.8955	1.5212	2.22409	2.51088					0.229363	0.875387	2.30227					0.191235	0.148958	0.437256
	7.97445	4.75485	9.36363	10.2907					0.398553	2.07728	4.0463					0.127099	0.078615	0.413617				7.97445	1.52384	2.21018	2.51179					0.228623	0.871053	2.29641					0.193683	0.1429	0.441009
	8.0542	4.76062	9.33488	10.2734					0.403005	2.07844	4.03929					0.129913	0.0806419	0.407164				8.0542	1.52611	2.19741	2.51205					0.22926	0.865394	2.28894					0.197363	0.138657	0.442764
	8.13474	4.7735	9.29178	10.2505					0.411617	2.08433	4.03047					0.136192	0.0846704	0.393583				8.13474	1.53285	2.18144	2.50642					0.23243	0.850331	2.27716					0.207545	0.134724	0.443304
	8.21609	4.78443	9.27094	10.2356					0.415644	2.08734	4.02643					0.140229	0.0856907	0.38696				8.21609	1.537	2.17755	2.49912					0.234112	0.842236	2.275					0.214068	0.133156	0.443167
	8.29825	4.79723	9.24584	10.2102					0.419451	2.0897	4.01936					0.143918	0.0864987	0.380189				8.29825	1.5409	2.17316	2.49083					0.235329	0.83454	2.2757					0.221278	0.133126	0.442738
	8.38123	4.8166	9.17687	10.1413					0.424219	2.09302	3.99303					0.147427	0.0896631	0.363206				8.38123	1.54237	2.1566	2.4791					0.233679	0.824511	2.28018					0.239055	0.133309	0.440642
	8.46504	4.82393	9.13902	10.1161					0.426678	2.096	3.97804					0.149209	0.0912783	0.353555				8.46504	1.54082	2.14543	2.47811					0.232145	0.819912	2.27961					0.248357	0.133164	0.437785
	8.54969	4.83122	9.10747	10.1048					0.428941	2.10032	3.96553					0.150377	0.0924673	0.344189				8.54969	1.54051	2.13578	2.47981					0.229859	0.815062	2.2755					0.257052	0.132275	0.434328
	8.63519	4.84446	9.0708	10.0982					0.431654	2.11146	3.95363					0.153358	0.0914975	0.329452				8.63519	1.54483	2.128	2.48203					0.224879	0.804351	2.26623					0.267138	0.129286	0.426604
	8.72154	4.85017	9.05803	10.0848					0.431497	2.11788	3.95					0.154347	0.0906639	0.323566				8.72154	1.55036	2.12874	2.47914					0.222227	0.797922	2.26701					0.268857	0.129665	0.422436
	8.80876	4.85522	9.04092	10.0622					0.430344	2.1235	3.94414					0.155059	0.0893417	0.31767				8.80876	1.55689	2.13019	2.47313					0.219791	0.791653	2.27173					0.270264	0.131683	0.417282
	8.89685	4.86013	8.98922	10.0078					0.42723	2.13273	3.92382					0.155519	0.0845565	0.306699				8.89685	1.56759	2.12886	2.45656					0.218004	0.783554	2.28078					0.275642	0.138509	0.403273
	8.98581	4.86019	8.96172	9.98442					0.424721	2.13668	3.91232					0.153632	0.0818526	0.302118				8.98581	1.56973	2.12529	2.45088					0.217556	0.78235	2.28043					0.281208	0.140804	0.395366
	9.07567	4.85691	8.9236	9.95817					0.422018	2.14601	3.89333					0.151726	0.0771744	0.295219				9.07567	1.56926	2.12192	2.45047					0.217178	0.777747	2.27518					0.290572	0.145067	0.377363
	9.16643	4.85771	8.91323	9.95549					0.420983	2.15139	3.88574					0.151467	0.0753964	0.293027				9.16643	1.57005	2.12371	2.45344					0.217698	0.774656	2.27377					0.291875	0.146856	0.367414
	9.25809	4.86756	8.89132	9.93293					0.420753	2.16282	3.87112					0.154078	0.0719496	0.291394				9.25809	1.57434	2.1318	2.45444					0.220767	0.770314	2.2785					0.284993	0.147316	0.347414
	9.35067	4.87187	8.87289	9.90568					0.419319	2.16739	3.86083					0.154102	0.0702552	0.292329				9.35067	1.57691	2.13479	2.45167					0.221945	0.770708	2.28374					0.276893	0.147115	0.33954
	9.44418	4.872	8.82425	9.85341					0.41419	2.17432	3.83867					0.154138	0.0684964	0.297246				9.44418	1.57829	2.13669	2.44553					0.225142	0.773634	2.28982					0.258165	0.144105	0.326572
	9.53862	4.86933	8.80528	9.84635					0.410677	2.1777	3.83156					0.154153	0.0682686	0.301277				9.53862	1.57862	2.13737	2.44496					0.226226	0.77463	2.28844					0.250567	0.14207	0.319848
	9.63401	4.86319	8.7929	9.85528					0.404973	2.18254	3.82695					0.156087	0.0698501	0.310363				9.63401	1.57868	2.14558	2.44847					0.225707	0.775743	2.28394					0.239004	0.13728	0.306229
	9.73035	4.85992	8.79277	9.85208					0.403537	2.18433	3.82495					0.157951	0.0714614	0.314295				9.73035	1.57797	2.15304	2.44881					0.224226	0.778237	2.28519					0.233275	0.135229	0.299394
	9.82765	4.85549	8.78047	9.82496					0.403706	2.18616	3.81236					0.165076	0.0759266	0.320786				9.82765	1.57342	2.1665	2.44652					0.21877	0.786621	2.29178					0.219629	0.130172	0.285573
	9.92593	4.85377	8.76754	9.80895	8.45744	9.40295			0.403595	2.18749	3.80433					0.168034	0.0799907	0.324812				9.92593	1.57036	2.17018	2.44598					0.215372	0.791443	2.29346					0.211244	0.128487	0.277822
	10.0252	4.84439	8.74319	9.78715	8.45107	9.39856			0.398882	2.1907	3.79492		3.68654			0.171496	0.0866981	0.33502				10.0252	1.56391	2.17404	2.4501	2.18332	2.45784			0.207381	0.800164	2.29334		2.19109			0.191604	0.126751	0.260721
	10.1254	4.83253	8.73216	9.7915	8.44464	9.39414			0.394086	2.19505	3.79646		3.68578			0.175065	0.0914717	0.347475				10.1254	1.56202	2.1823	2.45848	2.18158	2.45559			0.206245	0.806196	2.29175		2.18996			0.17192	0.124646	0.246441
	10.2267	4.82852	8.72727	9.79457	8.43817	9.38967			0.39312	2.19705	3.79872		3.685			0.177219	0.0943551	0.35456				10.2267	1.56191	2.18948	2.46018	2.17983	2.45333			0.208821	0.809423	2.29014		2.18883			0.164147	0.123716	0.242346
	10.329	4.81818	8.70763	9.77365	8.43164	9.38517			0.392257	2.19801	3.79597		3.68422			0.179671	0.0991297	0.367819				10.329	1.55875	2.20404	2.46018	2.17806	2.45106			0.213711	0.817095	2.28688		2.18768			0.152998	0.125979	0.240698
	10.4323	4.80852	8.69104	9.75565	8.42507	9.38063			0.392434	2.19703	3.78956		3.68343			0.181361	0.100839	0.371825				10.4323	1.55444	2.20968	2.46143	2.17629	2.44877			0.214553	0.822103	2.28465		2.18653			0.147874	0.129288	0.239656
	10.5366	4.78992	8.66182	9.74765	8.41845	9.37606			0.392755	2.1967	3.77967		3.68264			0.186172	0.105447	0.375802				10.5366	1.54514	2.21564	2.47203	2.1745	2.44646			0.215528	0.82996	2.27278		2.18536			0.134416	0.14006	0.233978
	10.6419	4.78032	8.65989	9.77116	8.41178	9.37144			0.393934	2.19998	3.78512		3.68183			0.190124	0.110595	0.379774				10.6419	1.53764	2.22362	2.4888	2.17269	2.44413			0.212645	0.832745	2.25656		2.18419			0.119036	0.152077	0.231882
	10.7484	4.77721	8.66316	9.77357	8.40506	9.36679			0.394461	2.20288	3.78873		3.68102			0.190615	0.113163	0.382751				10.7484	1.53517	2.23017	2.49371	2.17087	2.44178			0.209308	0.83177	2.25224		2.18301			0.112602	0.157978	0.234982
	10.8558	4.77276	8.65234	9.75312	8.3983	9.3621			0.396696	2.20592	3.7859		3.68021			0.192245	0.117343	0.387766				10.8558	1.5282	2.24325	2.49601	2.16904	2.43942			0.201046	0.831093	2.24702		2.18182			0.103911	0.168454	0.250086
	10.9644	4.76566	8.62064	9.73196	8.39148	9.35736			0.39872	2.20457	3.7784		3.67938			0.194124	0.119525	0.391017				10.9644	1.51943	2.25007	2.49754	2.1672	2.43705			0.191394	0.837442	2.23199		2.18061			0.0920844	0.179229	0.270873
	11.074	4.75352	8.60163	9.73186	8.38461	9.3526			0.404148	2.20533	3.77584		3.67855			0.196857	0.122441	0.393313				11.074	1.50902	2.25462	2.50339	2.16534	2.43465			0.193952	0.841117	2.21008		2.1794			0.0804346	0.190146	0.285714
	11.1848	4.75114	8.59974	9.73961	8.37769	9.34779			0.408397	2.20759	3.77639		3.67771			0.19843	0.124751	0.395323				11.1848	1.50508	2.25844	2.50534	2.16347	2.43224			0.196702	0.840552	2.20019		2.17818			0.0825675	0.195071	0.290408
	11.2966	4.7552	8.59973	9.73957	8.37072	9.34294			0.4184	2.21381	3.77629		3.67686			0.201915	0.131726	0.400756				11.2966	1.49761	2.26875	2.50225	2.16158	2.42981			0.198175	0.837651	2.18823		2.17695			0.0973194	0.204854	0.298921
	11.4096	4.75774	8.57946	9.69991	8.3637	9.33805			0.424574	2.21586	3.7665		3.67601			0.201974	0.13299	0.405237				11.4096	1.48705	2.27403	2.49633	2.15969	2.42736			0.191516	0.842424	2.18542		2.17571			0.10547	0.216993	0.30779
	11.5237	4.75788	8.54641	9.68007	8.35663	9.33312			0.431031	2.21821	3.75742		3.67514			0.203037	0.133904	0.407667				11.5237	1.47842	2.27251	2.49512	2.15777	2.4249			0.18307	0.851886	2.176		2.17445			0.103678	0.233659	0.310596
	11.6389	4.75883	8.53249	9.69453	8.34951	9.32815			0.43837	2.2209	3.76432		3.67427			0.200807	0.133963	0.413674				11.6389	1.4765	2.27385	2.49658	2.15585	2.42241			0.176872	0.858684	2.16069		2.17319			0.0964625	0.244956	0.31229
	11.7553	4.76131	8.52232	9.68139	8.34233	9.32315			0.444629	2.22191	3.77034		3.67339			0.195804	0.135961	0.422956				11.7553	1.47849	2.27855	2.49162	2.15391	2.41991			0.178808	0.862497	2.15328		2.17192			0.0885029	0.252273	0.311943
	11.8729	4.76319	8.50771	9.66198	8.33511	9.3181			0.447993	2.22151	3.76746		3.67251			0.194167	0.138226	0.426684				11.8729	1.4775	2.27945	2.48608	2.15195	2.4174			0.181247	0.866284	2.15182		2.17064			0.0860216	0.256718	0.309462
	11.9916	4.76606	8.4663	9.62078	8.32783	9.31301			0.453853	2.22098	3.75584		3.67161			0.19048	0.142641	0.434069				11.9916	1.47329	2.27536	2.47626	2.14998	2.41486			0.1858	0.87972	2.14463		2.16935			0.0843991	0.268904	0.298718
	12.1115	4.7678	8.43901	9.60201	8.32051	9.30788			0.457104	2.22284	3.75144		3.67071			0.184301	0.146139	0.440975				12.1115	1.47113	2.26924	2.47685	2.148	2.41231			0.187498	0.890694	2.13467		2.16804			0.0836522	0.279506	0.280206
	12.2326	4.77875	8.43033	9.60346	8.31313	9.3027			0.458487	2.22564	3.75593		3.6698			0.175257	0.148968	0.446943				12.2326	1.47829	2.26933	2.48013	2.146	2.40974			0.187622	0.894662	2.12993		2.16673			0.0808948	0.286524	0.268809
	12.355	4.7937	8.41914	9.5759	8.3057	9.29749			0.456503	2.22417	3.75723		3.66889			0.162704	0.151712	0.453484				12.355	1.48911	2.26834	2.47804	2.14399	2.40715			0.185792	0.903481	2.12934		2.16541			0.0725439	0.290424	0.263004
	12.4785	4.80008	8.38953	9.52944	8.29822	9.29223			0.451108	2.22213	3.74854		3.66796			0.148751	0.156431	0.461204				12.4785	1.49433	2.2609	2.47042	2.14197	2.40454			0.182015	0.916407	2.1259		2.16407			0.0763417	0.290381	0.257342
	12.6033	4.80819	8.36641	9.51986	8.29068	9.28694			0.445325	2.22235	3.74913		3.66703			0.135755	0.16436	0.467836				12.6033	1.49782	2.25144	2.46182	2.13993	2.40192			0.178038	0.924238	2.11901		2.16273			0.0919735	0.292252	0.249216
	12.7293	4.81867	8.36208	9.51342	8.28309	9.2816			0.438475	2.22118	3.75672		3.66608			0.121859	0.172879	0.471568				12.7293	1.50539	2.2456	2.45781	2.13788	2.39928			0.177623	0.932145	2.11939		2.16138			0.105416	0.296808	0.234629
	12.8566	4.83376	8.34681	9.47695	8.27545	9.27621			0.43102	2.21489	3.75091		3.66513			0.106932	0.177702	0.475009				12.8566	1.51389	2.23693	2.45884	2.13581	2.39662			0.18154	0.942582	2.12871		2.16001			0.127967	0.298915	0.215721
	12.9852	4.84568	8.31655	9.43967	8.26776	9.27079			0.423672	2.20877	3.74266		3.66417			0.0948187	0.178825	0.477823				12.9852	1.51907	2.2224	2.46098	2.13373	2.39394			0.187245	0.952316	2.135		2.15863			0.154214	0.295018	0.201039
	13.115	4.84661	8.29687	9.42409	8.26002	9.26532			0.41681	2.20513	3.74634		3.66321			0.0842932	0.178754	0.48145				13.115	1.52719	2.20893	2.46199	2.13163	2.39124			0.194068	0.958249	2.13789		2.15725			0.174708	0.287509	0.18941
	13.2462	4.85614	8.28953	9.42284	8.25222	9.25981			0.413842	2.20088	3.75755		3.66223			0.080501	0.180996	0.484543				13.2462	1.53899	2.20126	2.46195	2.12952	2.38853			0.201229	0.964611	2.14229		2.15585			0.190843	0.283052	0.176821
	13.3787	4.87033	8.2561	9.36302	8.24437	9.25425			0.41718	2.18867	3.75601		3.66124			0.0905245	0.182285	0.483815				13.3787	1.55128	2.18837	2.47134	2.1274	2.38579			0.205475	0.979896	2.15854		2.15444			0.220882	0.284239	0.148423
	13.5124	4.87098	8.22325	9.33857	8.23646	9.24865			0.41877	2.182	3.74851		3.66025			0.0949845	0.181294	0.483082				13.5124	1.55495	2.17242	2.4811	2.12526	2.38304			0.205338	0.984262	2.16516		2.15302			0.241971	0.283238	0.12809
	13.6476	4.87514	8.21656	9.35154	8.22851	9.24301			0.424169	2.17435	3.75684		3.65925			0.0992986	0.180726	0.482552				13.6476	1.56237	2.16304	2.48222	2.12311	2.38027			0.206745	0.982754	2.16372		2.15159			0.263895	0.277894	0.116817
	13.784	4.88245	8.2196	9.34172	8.2205	9.23732			0.427704	2.1658	3.76371		3.65824			0.102284	0.182083	0.481015				13.784	1.57563	2.16198	2.47913	2.12094	2.37749			0.213501	0.979272	2.17179		2.15015			0.288071	0.273296	0.112989
	13.9219	4.8887	8.20034	9.30929	8.21243	9.23159			0.429316	2.15597	3.7594		3.65722			0.104323	0.183582	0.477008				13.9219	1.58537	2.15843	2.47731	2.11876	2.37468			0.224959	0.982141	2.18436		2.1487			0.312476	0.27046	0.114162
	14.0611	4.88586	8.17098	9.28608	8.20432	9.22582			0.431406	2.14848	3.7544		3.65619			0.106359	0.180885	0.470477				14.0611	1.58874	2.14715	2.47704	2.11656	2.37186			0.235961	0.982772	2.18379		2.14724			0.332691	0.267115	0.120051
	14.2017	4.88698	8.15991	9.28417	8.19615	9.22			0.433866	2.14514	3.75697		3.65515			0.103892	0.179181	0.460323				14.2017	1.59117	2.13892	2.46251	2.11435	2.36902			0.248912	0.960591	2.17763		2.14576			0.356707	0.258066	0.130546
	14.3437	4.89788	8.15175	9.2548	8.18792	9.21413			0.434083	2.14031	3.75598		3.65411			0.0976769	0.180027	0.453189				14.3437	1.5921	2.13233	2.44648	2.11212	2.36616			0.255736	0.952281	2.18258		2.14428			0.37003	0.253664	0.140762
	14.4872	4.90016	8.11827	9.20811	8.17964	9.20822			0.436602	2.13386	3.74474		3.65305			0.0921661	0.178602	0.445625				14.4872	1.5848	2.12022	2.42826	2.10988	2.36328			0.258644	0.949104	2.18578		2.14278			0.373613	0.252758	0.154467
	14.632	4.90243	8.08918	9.21906	8.17131	9.20226			0.444712	2.12921	3.74348		3.65199			0.0859008	0.170646	0.432791				14.632	1.58126	2.10754	2.40946	2.10763	2.36038			0.256363	0.93476	2.17438		2.14127			0.372301	0.248436	0.176639
	14.7784	4.90428	8.09075	9.217	8.16293	9.19626			0.448215	2.12453	3.74635		3.65091			0.0800337	0.164551	0.422318				14.7784	1.57892	2.10897	2.39593	2.10536	2.35747			0.258569	0.924364	2.17452		2.13975			0.365319	0.244872	0.189483
	14.9261	4.907	8.07389	9.18935	8.15449	9.19022			0.451362	2.12175	3.73777		3.64983			0.075375	0.1596	0.415997				14.9261	1.5713	2.10557	2.37923	2.10307	2.35453			0.267407	0.919753	2.182		2.13822			0.351367	0.240715	0.201015
	15.0754	4.90832	8.0444	9.16299	8.146	9.18412			0.456961	2.12314	3.73088		3.64874			0.0708763	0.152602	0.407358				15.0754	1.56096	2.09436	2.35445	2.10078	2.35158			0.281236	0.913481	2.18003		2.13668			0.320444	0.235816	0.209729
	15.2262	4.91512	8.0429	9.17602	8.13745	9.17798			0.462721	2.12095	3.73415		3.64764			0.0725184	0.152146	0.397168				15.2262	1.55926	2.09366	2.34423	2.09846	2.34861			0.28567	0.910147	2.17576		2.13513			0.298905	0.234171	0.214849
	15.3784	4.92516	8.02403	9.14526	8.12885	9.1718			0.471963	2.1133	3.72512		3.64652			0.0800511	0.154425	0.38304				15.3784	1.55682	2.09126	2.31916	2.09613	2.34562			0.285486	0.918689	2.17145		2.13356			0.270165	0.223851	0.225306
	15.5322	4.93316	8.0014	9.13152	8.12019	9.16556			0.477429	2.11572	3.71372		3.6454			0.0872962	0.157784	0.379816				15.5322	1.55061	2.08482	2.29905	2.09379	2.34261			0.282113	0.919941	2.16298		2.13199			0.248975	0.213441	0.233607
	15.6875	4.94738	8.01918	9.16178	8.11149	9.15928			0.48541	2.12148	3.71345		3.64427			0.0987981	0.167405	0.376933				15.6875	1.54189	2.08343	2.27617	2.09143	2.33959			0.278958	0.923857	2.1502		2.1304			0.216002	0.201524	0.247389
	15.8444	4.95307	8.03168	9.1521	8.10272	9.15296			0.49147	2.11645	3.70315		3.64313			0.108407	0.174367	0.37595				15.8444	1.53331	2.08341	2.26066	2.08906	2.33655			0.280213	0.936619	2.15783		2.1288			0.193774	0.196141	0.248753
	16.0028	4.94413	8.02594	9.13623	8.09391	9.14658			0.499073	2.10821	3.68353		3.64198			0.121499	0.181187	0.378125				16.0028	1.52034	2.07207	2.24758	2.08668	2.33348			0.286941	0.953312	2.15763		2.12719			0.169011	0.184644	0.257864
	16.1629	4.94447	8.03352	9.15467	8.08504	9.14016			0.503783	2.10986	3.68034		3.64082			0.129763	0.182162	0.38513				16.1629	1.51484	2.06791	2.24654	2.08427	2.3304			0.290995	0.959086	2.15334		2.12557			0.166082	0.173664	0.265482
	16.3245	4.95083	8.04898	9.16524	8.07611	9.13369			0.513681	2.11248	3.6683		3.63965			0.145835	0.18089	0.401153				16.3245	1.50631	2.07075	2.2431	2.08186	2.3273			0.292918	0.971795	2.16335		2.12393			0.162727	0.158644	0.266463
	16.4877	4.93672	8.03769	9.14351	8.06713	9.12718			0.518695	2.11019	3.64855		3.63848			0.156829	0.180483	0.413057				16.4877	1.49677	2.06784	2.24715	2.07943	2.32419			0.290106	0.977267	2.17633		2.12229			0.165705	0.153405	0.259869
	16.6526	4.91743	8.04925	9.18598	8.0581	9.12061			0.520709	2.11168	3.64296		3.63729			0.166892	0.179002	0.432054				16.6526	1.49328	2.06356	2.27589	2.07698	2.32105			0.282866	0.982498	2.17717		2.12063			0.194459	0.148746	0.246619
	16.8191	4.90126	8.08111	9.19837	8.04902	9.114			0.518438	2.11865	3.6383		3.63609			0.172135	0.168532	0.453844				16.8191	1.487	2.0704	2.29349	2.07452	2.3179			0.280009	0.979577	2.19084		2.11896			0.212507	0.136797	0.242409
	16.9873	4.88506	8.07729	9.18503	8.03988	9.10734			0.514179	2.12212	3.62412		3.63488			0.176321	0.159066	0.470387				16.9873	1.47882	2.06552	2.29958	2.07205	2.31473			0.281211	0.978841	2.19734		2.11728			0.222723	0.127213	0.243513
	17.1572	4.85514	8.08888	9.20346	8.03068	9.10063			0.50629	2.1318	3.6098		3.63366			0.179881	0.155535	0.494395				17.1572	1.47223	2.06007	2.32277	2.06956	2.31154			0.28662	0.967848	2.19632		2.11558			0.244812	0.12379	0.228187
	17.3288	4.83758	8.12316	9.21957	8.02144	9.09387			0.494318	2.13976	3.60185		3.63243			0.174965	0.156091	0.515596				17.3288	1.4688	2.06708	2.33711	2.06705	2.30833			0.285023	0.954779	2.20606		2.11388			0.25808	0.126137	0.220108
	17.5021	4.8154	8.11869	9.19431	8.01214	9.08706			0.479898	2.14659	3.58224		3.63119			0.168734	0.150174	0.532172				17.5021	1.45612	2.06117	2.35029	2.06453	2.3051			0.272455	0.946828	2.21115		2.11216			0.261424	0.119969	0.213199
	17.6771	4.80349	8.12564	9.22108	8.00278	9.08021			0.474403	2.15829	3.58164		3.62994			0.16664	0.146779	0.542489				17.6771	1.4509	2.05941	2.37394	2.062	2.30186			0.263433	0.937444	2.20842		2.11043			0.266095	0.117964	0.205838
	17.8539	4.7854	8.14155	9.22517	7.99337	9.0733			0.464939	2.17509	3.57364		3.62867			0.158039	0.143485	0.552879				17.8539	1.4475	2.06298	2.39565	2.05945	2.2986			0.26023	0.925545	2.22218		2.10869			0.271195	0.122868	0.189802
	18.0324	4.76257	8.12947	9.20817	7.98391	9.06635			0.467602	2.18897	3.56198		3.6274			0.165249	0.143619	0.554164				18.0324	1.44066	2.05791	2.40447	2.05689	2.29532			0.263362	0.91954	2.22949		2.10693			0.269204	0.128121	0.174513
	18.2127	4.75905	8.14192	9.23909	7.9744	9.05934			0.479221	2.21235	3.56966		3.62612			0.177674	0.143125	0.555305				18.2127	1.44214	2.05955	2.42139	2.05431	2.29202			0.259875	0.916656	2.22798		2.10517			0.267373	0.138519	0.161087
	18.3949	4.75266	8.13482	9.22489	7.96483	9.05229			0.489471	2.235	3.56019		3.62483			0.186607	0.142646	0.548726				18.3949	1.44973	2.06397	2.43288	2.05172	2.2887			0.246767	0.91845	2.23353		2.10339			0.27881	0.14708	0.153862
	18.5788	4.75164	8.11573	9.22761	7.95521	9.04519			0.494556	2.2584	3.55352		3.62352			0.190315	0.15012	0.540992				18.5788	1.45413	2.0526	2.43077	2.04912	2.28537			0.23352	0.916046	2.22669		2.1016			0.281273	0.158127	0.152753
	18.7646	4.75889	8.13834	9.25011	7.94554	9.03803			0.502426	2.2749	3.57093		3.62221			0.192463	0.154319	0.534643				18.7646	1.46006	2.05466	2.4163	2.0465	2.28201			0.227343	0.924224	2.21921		2.09979			0.278092	0.173524	0.15435
	18.9522	4.75526	8.12146	9.22668	7.93581	9.03083			0.508548	2.28522	3.56427		3.62088			0.19059	0.152847	0.521754				18.9522	1.46747	2.04521	2.40269	2.04386	2.27864			0.229784	0.94075	2.21611		2.09798			0.281823	0.185279	0.162351
	19.1418	4.75027	8.11554	9.2417	7.92603	9.02358			0.515753	2.30161	3.56639		3.61955			0.183954	0.148037	0.505763				19.1418	1.474	2.03449	2.39377	2.04121	2.27526			0.235508	0.949972	2.19982		2.09615			0.274552	0.193531	0.17083
	19.3332	4.75684	8.1248	9.24717	7.9162	9.01627			0.522556	2.3104	3.57585		3.6182			0.17646	0.142709	0.486091				19.3332	1.48321	2.0362	2.3641	2.03855	2.27185			0.233811	0.961556	2.19545		2.09431			0.261612	0.201498	0.184396
	19.5265	4.74673	8.1001	9.2127	7.90632	9.00892			0.526571	2.3083	3.56906		3.61684			0.165655	0.140294	0.465894				19.5265	1.48642	2.02401	2.34188	2.03587	2.26843			0.227084	0.976034	2.1838		2.09246			0.25336	0.212595	0.202909
	19.7218	4.74317	8.10501	9.24605	7.89638	9.00151			0.532002	2.3127	3.58274		3.61547			0.154647	0.135221	0.438724				19.7218	1.50094	2.0197	2.33275	2.03318	2.26499			0.222396	0.986193	2.1625		2.0906			0.248772	0.214876	0.219896
	19.919	4.745	8.09322	9.21924	7.88639	8.99406			0.538592	2.30987	3.57919		3.61409			0.145315	0.137572	0.409827				19.919	1.51594	2.01682	2.30478	2.03048	2.26153			0.231969	0.987244	2.15225		2.08872			0.240949	0.219838	0.244372
	20.1182	4.73726	8.07059	9.19534	7.87635	8.98655			0.542332	2.29957	3.57877	0.593136	3.6127			0.136637	0.141391	0.385292		0.139085		20.1182	1.52119	2.00185	2.28193	2.02776	2.25806			0.240681	0.979047	2.12134	0.30551	2.08683			0.23126	0.22345	0.270024		0.169754
	20.3194	4.73849	8.06383	9.16851	7.86626	8.979			0.555118	2.27694	3.58881	0.594999	3.61129			0.130863	0.144732	0.350838		0.139335		20.3194	1.53541	1.99406	2.25544	2.02502	2.25457			0.244838	0.968199	2.09529	0.306051	2.08493			0.228528	0.222899	0.299648		0.170018
	20.5226	4.73095	8.02009	9.10588	7.85612	8.97139			0.560601	2.2604	3.57602	0.596877	3.60988			0.126074	0.141621	0.326135		0.139586		20.5226	1.53972	1.97511	2.2397	2.02227	2.25106			0.246332	0.956263	2.07166	0.306596	2.08301			0.218426	0.221122	0.319869		0.170285
	20.7278	4.72666	8.01212	9.10646	7.84593	8.96373			0.569651	2.24489	3.585	0.598772	3.60845			0.12083	0.13941	0.3077		0.13984		20.7278	1.54061	1.96813	2.22612	2.01951	2.24753			0.261562	0.931753	2.04205	0.307147	2.08109			0.210473	0.215918	0.331828		0.170554
	20.9351	4.72398	7.98039	9.04177	7.83568	8.95602			0.580947	2.22382	3.57541	0.600681	3.60702			0.119643	0.138257	0.296189		0.140096		20.9351	1.54091	1.95993	2.21007	2.01674	2.24399			0.278275	0.91379	2.03384	0.307702	2.07915			0.2038	0.208991	0.342144		0.170824
	21.1444	4.72003	7.92524	8.98796	7.82539	8.94825			0.591073	2.21418	3.5664	0.602607	3.60557			0.121056	0.1371	0.282357		0.140354		21.1444	1.53926	1.94366	2.22089	2.01395	2.24043			0.280953	0.887772	2.01429	0.308262	2.0772			0.19609	0.197797	0.349868		0.171098
	21.3559	4.73574	7.90028	8.94708	7.81505	8.94044			0.602728	2.21236	3.56378	0.604548	3.6041			0.127472	0.133291	0.285366		0.140614		21.3559	1.53321	1.94296	2.22175	2.01114	2.23685			0.280185	0.867452	2.00575	0.308827	2.07523			0.179819	0.190034	0.352986		0.171373
	21.5694	4.74405	7.82471	8.87298	7.80465	8.93258			0.616571	2.21225	3.54348	0.606506	3.60263			0.13992	0.133672	0.306528		0.140876		21.5694	1.51933	1.92549	2.23141	2.00833	2.23326			0.287647	0.841983	1.99936	0.309397	2.07326			0.160495	0.181866	0.354043		0.171651
	21.7851	4.76164	7.80115	8.84577	7.79421	8.92466			0.623111	2.20942	3.54699	0.608479	3.60115			0.147148	0.136743	0.319702		0.141141		21.7851	1.50991	1.92512	2.23664	2.0055	2.22965			0.295922	0.825835	2.00057	0.309972	2.07127			0.152285	0.17721	0.351219		0.171931
	22.003	4.7788	7.72139	8.75485	7.78371	8.91669			0.633929	2.21624	3.51917	0.610468	3.59965			0.154093	0.134763	0.345217		0.141407		22.003	1.48743	1.90905	2.23854	2.00265	2.22602			0.297252	0.814876	2.00288	0.310552	2.06927			0.146181	0.164117	0.349908		0.172213
	22.223	4.78931	7.70153	8.75576	7.77317	8.90867			0.637761	2.22471	3.51834	0.612474	3.59814			0.153762	0.129939	0.361101		0.141676		22.223	1.47877	1.90815	2.24568	1.9998	2.22238			0.288566	0.803406	2.00539	0.311137	2.06726			0.147565	0.156572	0.34363		0.172497
	22.4452	4.80091	7.65918	8.68505	7.76258	8.9006			0.633331	2.23148	3.5081	0.614496	3.59662			0.144436	0.126573	0.376529		0.141947		22.4452	1.46663	1.9101	2.24084	1.99693	2.21872			0.273591	0.80653	2.04024	0.311728	2.06523			0.172967	0.137202	0.336622		0.172784
	22.6697	4.80512	7.63271	8.69221	7.75194	8.89248			0.630552	2.24773	3.51197	0.616534	3.59509			0.129995	0.121317	0.389007		0.142221		22.6697	1.46155	1.90888	2.24404	1.99404	2.21504			0.270877	0.805941	2.05102	0.312323	2.06319			0.191704	0.12492	0.327335		0.173073
	22.8964	4.79898	7.60777	8.65055	7.74125	8.88431			0.629807	2.26166	3.50864	0.618589	3.59354			0.115583	0.117023	0.40199		0.142496		22.8964	1.47141	1.9119	2.22757	1.99115	2.21135			0.265278	0.809639	2.07305	0.312923	2.06114			0.213765	0.114452	0.316585		0.173365
	23.1253	4.7797	7.5845	8.63924	7.73052	8.87608			0.619206	2.26531	3.51854	0.62066	3.59199			0.0933038	0.113622	0.40673		0.142774		23.1253	1.47183	1.90487	2.22081	1.98824	2.20765			0.253584	0.80595	2.07592	0.313529	2.05908			0.239304	0.104648	0.294599		0.173659
	23.3566	4.76964	7.58258	8.62345	7.71974	8.8678			0.612855	2.2691	3.5328	0.622748	3.59042			0.077361	0.110788	0.413253		0.143054		23.3566	1.48982	1.91102	2.21467	1.98531	2.20393			0.250662	0.809447	2.0827	0.314139	2.057			0.258682	0.100385	0.28145		0.173955
	23.5901	4.73735	7.5531	8.58974	7.70891	8.85947			0.601255	2.26458	3.534	0.624853	3.58884			0.0672389	0.112565	0.409024		0.143336		23.5901	1.50647	1.90022	2.20699	1.98238	2.20019			0.245209	0.820827	2.08073	0.314755	2.05491			0.264689	0.107193	0.255868		0.174254
	23.8261	4.7091	7.57039	8.58676	7.69803	8.85109			0.592132	2.25646	3.56219	0.626975	3.58724			0.0666037	0.108184	0.393037		0.143621		23.8261	1.52478	1.90012	2.20749	1.97943	2.19644			0.245666	0.824002	2.07631	0.315377	2.05281			0.254368	0.117415	0.237056		0.174555
	24.0643	4.66378	7.54531	8.55272	7.68711	8.84266			0.58186	2.25136	3.57237	0.629114	3.58564			0.0626144	0.11212	0.377657		0.143908		24.0643	1.54257	1.88405	2.20227	1.97647	2.19267			0.256339	0.839778	2.07352	0.316003	2.0507			0.236432	0.127296	0.214931		0.174859
	24.305	4.64796	7.54584	8.56758	7.67615	8.83417			0.585615	2.25047	3.5845	0.631269	3.58402			0.0713124	0.118305	0.36548		0.144197		24.305	1.55708	1.87921	2.19588	1.9735	2.18888			0.258957	0.845078	2.06244	0.316635	2.04857			0.234691	0.138741	0.203726		0.175165
	24.548	4.61494	7.50737	8.51473	7.66513	8.82563			0.588281	2.24619	3.57884	0.633442	3.58239			0.0774896	0.127745	0.352833		0.144488		24.548	1.54979	1.85899	2.18514	1.97051	2.18509			0.256709	0.845911	2.04446	0.317273	2.04643			0.234314	0.150804	0.200631		0.175473
	24.7935	4.59024	7.50692	8.53433	7.65408	8.81704			0.597095	2.24086	3.59768	0.635632	3.58074			0.0842171	0.139321	0.348448		0.144782		24.7935	1.55549	1.84941	2.182	1.96751	2.18127			0.234126	0.844546	2.02491	0.317916	2.04428			0.244837	0.160839	0.200778		0.175784
	25.0414	4.56868	7.47125	8.49976	7.64298	8.8084			0.60357	2.23476	3.59031	0.63784	3.57909			0.092403	0.157721	0.348833		0.145079		25.0414	1.53328	1.84125	2.16796	1.9645	2.17745			0.220584	0.851812	2.00671	0.318564	2.04212			0.244285	0.16685	0.218232		0.176097
	25.2918	4.56867	7.46126	8.51327	7.63183	8.79971			0.614235	2.23525	3.6054	0.640064	3.57742			0.0988011	0.169019	0.352741		0.145377		25.2918	1.51414	1.83816	2.14693	1.96148	2.17361			0.240975	0.847822	1.98616	0.319218	2.03995			0.217382	0.162999	0.243236		0.176413
	25.5448	4.57591	7.41914	8.46393	7.62065	8.79096			0.616297	2.22363	3.58741	0.642307	3.57574			0.0921585	0.176047	0.353975		0.145678		25.5448	1.48606	1.82665	2.12481	1.95845	2.16975			0.273603	0.864647	1.97236	0.319877	2.03776			0.201558	0.159271	0.279748		0.176731
	25.8002	4.59752	7.42899	8.49475	7.60941	8.78217			0.625991	2.22697	3.5949	0.644567	3.57404			0.0878001	0.184225	0.362356		0.145981		25.8002	1.45893	1.83898	2.10067	1.9554	2.16588			0.297282	0.872865	1.95043	0.320542	2.03556			0.174213	0.150066	0.319941		0.177052
	26.0582	4.61018	7.40916	8.46304	7.59814	8.77332			0.623888	2.21793	3.58709	0.646844	3.57233			0.0765135	0.183395	0.368446		0.146287		26.0582	1.4248	1.8486	2.07355	1.95234	2.162			0.308913	0.887626	1.95008	0.321212	2.03334			0.144627	0.149124	0.360568		0.177376
	26.3188	4.65373	7.4098	8.47373	7.58683	8.76442			0.659776	2.21323	3.58743	0.64914	3.57061			0.106811	0.187143	0.370175		0.146595		26.3188	1.41206	1.87307	2.04102	1.94928	2.15811			0.335222	0.908444	1.936	0.321889	2.03112			0.148146	0.146627	0.409444		0.177702
	26.582	4.67962	7.38625	8.44995	7.57547	8.75547			0.680143	2.20546	3.57337	0.651453	3.56888			0.13053	0.180472	0.370668		0.146906		26.582	1.40165	1.88014	2.01737	1.9462	2.1542			0.340997	0.92445	1.92054	0.322571	2.02888			0.130478	0.153048	0.444496		0.17803
	26.8478	4.71469	7.4036	8.46835	7.56408	8.74646			0.699552	2.19079	3.58342	0.653784	3.56713			0.159424	0.168888	0.363234		0.147219		26.8478	1.40836	1.89943	1.99946	1.9431	2.15027			0.336677	0.941041	1.92304	0.323258	2.02663			0.11247	0.162103	0.463023		0.178361
	27.1163	4.73152	7.38594	8.44538	7.55264	8.73741			0.712861	2.18813	3.57663	0.656134	3.56537			0.17854	0.161842	0.354626		0.147535		27.1163	1.41812	1.89835	1.99071	1.94	2.14634			0.320979	0.958015	1.91679	0.323952	2.02437			0.111017	0.181724	0.481287		0.178695
	27.3874	4.75822	7.39744	8.45699	7.54117	8.72831			0.717452	2.18817	3.58175	0.658501	3.5636			0.18612	0.158546	0.331803		0.147853		27.3874	1.43849	1.90238	1.97398	1.93689	2.14239			0.318596	0.966167	1.92152	0.324651	2.0221			0.0974944	0.193552	0.475926		0.179031
	27.6613	4.76396	7.38007	8.47988	7.52965	8.71915			0.716176	2.19427	3.58363	0.660887	3.56181			0.184772	0.16075	0.313407		0.148173		27.6613	1.4563	1.88881	1.96956	1.93377	2.13843			0.31525	0.961256	1.91812	0.325356	2.01981			0.0897421	0.197507	0.461908		0.17937
	27.9379	4.77257	7.37557	8.4748	7.5181	8.70994			0.710698	2.2017	3.57865	0.66329	3.56001			0.164834	0.161463	0.283002		0.148496		27.9379	1.48117	1.87461	1.95575	1.93063	2.13446			0.302353	0.949343	1.92228	0.326067	2.01752			0.0888468	0.190056	0.444442		0.179711
	28.2173	4.77454	7.37567	8.51763	7.50651	8.70068			0.696303	2.20636	3.58395	0.665713	3.5582			0.149698	0.155243	0.260407		0.148822		28.2173	1.50078	1.85431	1.96881	1.92749	2.13047			0.307952	0.924423	1.90787	0.326784	2.01521			0.108052	0.165863	0.423854		0.180055
	28.4995	4.78007	7.37032	8.49762	7.49489	8.69137			0.68154	2.20051	3.57951	0.668154	3.55637			0.132271	0.142369	0.244854		0.14915		28.4995	1.51795	1.83275	1.96479	1.92433	2.12648			0.317193	0.907228	1.90738	0.327507	2.01288			0.112016	0.14681	0.409754		0.180402
	28.7845	4.78283	7.37755	8.55049	7.48323	8.68201			0.664612	2.2056	3.58137	0.670613	3.55453			0.116306	0.126405	0.228734		0.14948		28.7845	1.53863	1.81381	1.97916	1.92117	2.12247			0.310343	0.878055	1.88281	0.328236	2.01055			0.115493	0.102378	0.384312		0.180751
	29.0723	4.78217	7.36286	8.53754	7.47153	8.6726			0.650197	2.1983	3.56435	0.673091	3.55268			0.108264	0.131	0.232787		0.149814		29.0723	1.55514	1.7857	1.98136	1.918	2.11845			0.290069	0.869292	1.873	0.32897	2.00821			0.0851394	0.0837999	0.364506		0.181103
	29.363	4.78891	7.37908	8.55863	7.4598	8.66314			0.646367	2.19593	3.56344	0.675587	3.55081			0.107212	0.142167	0.251154		0.150149		29.363	1.57002	1.79025	1.97672	1.91481	2.11442			0.29523	0.868758	1.86326	0.329711	2.00585			0.108444	0.0846466	0.357318		0.181458
	29.6567	4.77992	7.36505	8.54979	7.44803	8.65363			0.639512	2.18871	3.55386	0.678103	3.54893			0.119973	0.153644	0.287489		0.150487		29.6567	1.57726	1.78967	1.97042	1.91162	2.11038			0.280123	0.869392	1.86028	0.330458	2.00348			0.148585	0.0923235	0.354795		0.181815
	29.9532	4.77483	7.35903	8.51444	7.43623	8.64407			0.64094	2.17194	3.53899	0.680637	3.54704			0.132129	0.164101	0.325675		0.150828		29.9532	1.58861	1.78781	1.94681	1.90842	2.10633			0.268344	0.899389	1.86758	0.331212	2.0011			0.183548	0.112198	0.346971		0.182175
	30.2528	4.76494	7.35669	8.5111	7.4244	8.63446			0.645711	2.17008	3.54027	0.683191	3.54513			0.145619	0.171579	0.376767		0.151172		30.2528	1.58773	1.79327	1.93669	1.90521	2.10227			0.26924	0.918822	1.87043	0.331971	1.99871			0.189371	0.130233	0.338385		0.182538
	30.5553	4.75469	7.31547	8.4476	7.41254	8.6248			0.649401	2.16628	3.52152	0.685763	3.54321			0.147937	0.181614	0.406031		0.151518		30.5553	1.57813	1.79365	1.92208	1.90199	2.0982			0.260186	0.959131	1.88929	0.332737	1.9963			0.205035	0.146103	0.322971		0.182904
	30.8608	4.74265	7.30701	8.44204	7.40065	8.61509			0.662222	2.16976	3.52898	0.688354	3.54127			0.141579	0.180855	0.440243		0.151866		30.8608	1.57187	1.80591	1.91721	1.89876	2.09412			0.242463	0.986954	1.90932	0.333508	1.99389			0.196695	0.15508	0.309096		0.183272
	31.1695	4.7191	7.26187	8.40268	7.38872	8.60533			0.667594	2.16999	3.5275	0.690965	3.53932			0.130633	0.175515	0.458195		0.152218		31.1695	1.55851	1.80788	1.91755	1.89552	2.09003			0.244588	1.00301	1.92283	0.334287	1.99146			0.198011	0.155677	0.287722		0.183643
	31.4811	4.69799	7.2264	8.35066	7.37677	8.59552			0.682298	2.16767	3.52577	0.693595	3.53736			0.118011	0.157761	0.467525		0.152572		31.4811	1.54638	1.80014	1.93773	1.89228	2.08593			0.248356	1.00165	1.93879	0.335071	1.98902			0.225405	0.166993	0.277215		0.184017
	31.796	4.68083	7.225	8.35814	7.36479	8.58566			0.691095	2.16154	3.54625	0.696244	3.53538			0.106638	0.145407	0.464288		0.152928		31.796	1.54297	1.79815	1.97114	1.88902	2.08182			0.234983	0.987656	1.93453	0.335862	1.98657			0.291921	0.173222	0.272404		0.184393
	32.1139	4.65486	7.19283	8.31792	7.35278	8.57576			0.700238	2.15332	3.53859	0.698912	3.53339			0.106663	0.12693	0.452955		0.153287		32.1139	1.53553	1.78809	2.01041	1.88576	2.07771			0.232982	0.978229	1.95188	0.336659	1.98411			0.359442	0.194517	0.259181		0.184772
	32.4351	4.64493	7.19443	8.29776	7.34074	8.5658			0.708491	2.1482	3.54166	0.7016	3.53138			0.106009	0.0926158	0.453418		0.153649		32.4351	1.53802	1.79363	2.03966	1.8825	2.07358			0.230244	0.959971	1.96204	0.337463	1.98164			0.413432	0.213186	0.269094		0.185154
	32.7594	4.62916	7.19519	8.30484	7.32868	8.5558			0.720471	2.13253	3.54449	0.704308	3.52937			0.115459	0.0792592	0.458731		0.154014		32.7594	1.5323	1.78519	2.05735	1.87922	2.06945			0.214713	0.925051	1.97345	0.338273	1.97916			0.43454	0.226292	0.286139		0.185539
	33.087	4.61264	7.17541	8.2669	7.31659	8.54575			0.720996	2.12007	3.52797	0.707035	3.52733			0.11188	0.0678719	0.469619		0.154381		33.087	1.5117	1.76682	2.04968	1.87594	2.06531			0.234863	0.888363	1.97711	0.33909	1.97666			0.416469	0.242283	0.314233		0.185927
	33.4179	4.63279	7.18007	8.26102	7.30448	8.53566			0.7326	2.10724	3.51734	0.709782	3.52528			0.116463	0.0721674	0.478613		0.154751		33.4179	1.48603	1.76704	2.01596	1.87265	2.06117			0.255812	0.863345	1.99043	0.339913	1.97416			0.383122	0.244656	0.336778		0.186318
	33.752	4.65683	7.17195	8.26289	7.29235	8.52551			0.739288	2.10262	3.51167	0.712549	3.52322			0.113776	0.0956516	0.497623		0.155124		33.752	1.43678	1.76809	1.97455	1.86936	2.05701			0.260629	0.832345	1.98977	0.340743	1.97164			0.335442	0.239365	0.356337		0.186711
	34.0896	4.66829	7.13944	8.22175	7.28019	8.51532			0.743034	2.10081	3.49806	0.715335	3.52115			0.108519	0.109975	0.505764		0.155499		34.0896	1.38559	1.77936	1.92674	1.86605	2.05285			0.285616	0.817307	1.99462	0.341579	1.96912			0.315888	0.234328	0.396691		0.187107
	34.4305	4.68417	7.12493	8.21395	7.26801	8.50509			0.74839	2.10645	3.4971	0.718141	3.51906			0.0997018	0.122998	0.505287		0.155877		34.4305	1.33773	1.80103	1.89094	1.86275	2.04869			0.315077	0.80696	1.98856	0.342422	1.96658			0.291499	0.228524	0.44002		0.187506
	34.7748	4.70523	7.10186	8.225	7.25582	8.4948			0.749523	2.12039	3.49988	0.720968	3.51695			0.104557	0.144375	0.502892		0.156258		34.7748	1.29237	1.82741	1.87375	1.85943	2.04452			0.324808	0.798382	1.96851	0.343272	1.96403			0.291095	0.229103	0.486621		0.187908
	35.1225	4.7191	7.0549	8.2013	7.2436	8.48447			0.751662	2.13232	3.48018	0.723814	3.51483			0.0958808	0.162642	0.497629		0.156641		35.1225	1.27278	1.84458	1.8756	1.85611	2.04034			0.34839	0.812665	1.96568	0.344129	1.96148			0.282208	0.219851	0.504292		0.188313
	35.4737	4.73597	7.01655	8.17565	7.23136	8.4741			0.742086	2.14761	3.46158	0.72668	3.5127			0.0808153	0.192001	0.506838		0.157028		35.4737	1.27572	1.8908	1.88082	1.85279	2.03616			0.339237	0.835804	1.95704	0.344992	1.95891			0.273214	0.212011	0.513454		0.188721
	35.8285	4.74471	6.98734	8.20255	7.21911	8.46368			0.744775	2.1667	3.444	0.729566	3.51055			0.0671243	0.215233	0.50989		0.157417		35.8285	1.30032	1.91304	1.90023	1.84946	2.03197			0.328763	0.858135	1.95191	0.345862	1.95633			0.249011	0.193281	0.512508		0.189131
	36.1868	4.74294	6.9483	8.18863	7.20684	8.45322			0.751148	2.1775	3.42059	0.732473	3.50839			0.065927	0.223444	0.512078		0.157809		36.1868	1.32245	1.91351	1.89763	1.84613	2.02778			0.332073	0.890315	1.93742	0.346739	1.95374			0.22542	0.167146	0.519937		0.189544
	36.5486	4.76112	6.90412	8.15987	7.19455	8.44271			0.764469	2.1796	3.38203	0.735399	3.50621			0.0709661	0.230735	0.507198		0.158204		36.5486	1.35353	1.90195	1.87334	1.84279	2.02359			0.324788	0.929914	1.94466	0.347623	1.95115			0.180816	0.143139	0.512627		0.189961
	36.9141	4.77051	6.89456	8.16277	7.18225	8.43216			0.767471	2.17874	3.37223	0.738346	3.50402			0.0817906	0.234622	0.511073		0.158601		36.9141	1.38415	1.8979	1.83693	1.83945	2.01939			0.298557	0.955507	1.93584	0.348513	1.94854			0.156795	0.12686	0.522871		0.19038
	37.2833	4.77261	6.88596	8.16554	7.16994	8.42157			0.758435	2.1722	3.36943	0.741314	3.50182			0.091936	0.229938	0.510305		0.159001		37.2833	1.40059	1.87136	1.82163	1.8361	2.01519			0.300631	0.969456	1.9119	0.349411	1.94592			0.169551	0.144503	0.533636		0.190802
	37.6561	4.76477	6.86883	8.14616	7.15762	8.41093			0.741256	2.16905	3.37571	0.744301	3.4996			0.101114	0.220434	0.498268		0.159404		37.6561	1.39366	1.83464	1.7946	1.83275	2.01098			0.307761	0.953232	1.87344	0.350316	1.9433			0.206477	0.174273	0.556369		0.191227
	38.0327	4.7617	6.85999	8.1206	7.14528	8.40025			0.720518	2.15835	3.3903	0.747309	3.49737			0.104338	0.201663	0.479393		0.15981		38.0327	1.37043	1.79746	1.78544	1.8294	2.00678			0.310222	0.922425	1.84235	0.351227	1.94066			0.265004	0.215776	0.557297		0.191655
	38.413	4.74127	6.84953	8.11023	7.13294	8.38953			0.708073	2.15369	3.41512	0.750338	3.49512			0.102375	0.182645	0.470717		0.160219		38.413	1.35847	1.78225	1.78871	1.82605	2.00257			0.336817	0.874657	1.80897	0.352146	1.93801			0.264547	0.233598	0.547199		0.192086
	38.7971	4.71386	6.8341	8.1126	7.12058	8.37876			0.706895	2.15207	3.44167	0.753387	3.49285			0.0963169	0.159639	0.445323		0.160631		38.7971	1.35074	1.76382	1.81043	1.82269	1.99836			0.34515	0.819534	1.77963	0.353072	1.93536			0.262455	0.242417	0.526185		0.19252
	39.1851	4.67529	6.79907	8.07624	7.10822	8.36796			0.716895	2.15005	3.4504	0.756456	3.49058			0.0809184	0.128465	0.425271		0.161045		39.1851	1.355	1.744	1.82907	1.81933	1.99414			0.357785	0.779575	1.77147	0.354004	1.9327			0.231336	0.23804	0.513549		0.192957
	39.5769	4.6605	6.76849	8.03869	7.09585	8.35712			0.743391	2.14082	3.4598	0.759547	3.48828			0.0602017	0.10906	0.390743		0.161462		39.5769	1.37728	1.74267	1.84872	1.81596	1.98993			0.376607	0.757371	1.79545	0.354944	1.93002			0.229878	0.228308	0.481521		0.193397
	39.9727	4.64284	6.75191	8.00243	7.08348	8.34623			0.771497	2.13724	3.45632	0.762657	3.48598			0.0664799	0.114763	0.358055		0.161883		39.9727	1.40596	1.74981	1.86129	1.8126	1.98572			0.36042	0.778096	1.83654	0.355892	1.92734			0.254802	0.202389	0.442249		0.19384
	40.3724	4.6403	6.76437	7.98714	7.0711	8.33531			0.792486	2.14011	3.45477	0.765789	3.48366			0.101384	0.128977	0.33223		0.162305		40.3724	1.44697	1.76132	1.86962	1.80924	1.98151			0.360721	0.809252	1.8749	0.356846	1.92465			0.277782	0.182924	0.393937		0.194285
	40.7762	4.63928	6.7894	7.97042	7.05872	8.32435			0.810014	2.13879	3.44582	0.768941	3.48132			0.151362	0.131794	0.310648		0.162731		40.7762	1.47079	1.76813	1.88338	1.80587	1.97729			0.367862	0.848049	1.89912	0.357808	1.92196			0.24279	0.157629	0.329294		0.194734
	41.1839	4.63909	6.81441	7.9444	7.04633	8.31335			0.814977	2.13691	3.42832	0.772113	3.47897			0.178818	0.136236	0.311993		0.16316		41.1839	1.47851	1.77268	1.90637	1.8025	1.97308			0.366551	0.871521	1.89533	0.358776	1.91925			0.18456	0.16232	0.281874		0.195186
	41.5958	4.6365	6.84236	7.93419	7.03395	8.30231			0.806003	2.138	3.39899	0.775307	3.4766			0.188566	0.127237	0.325116		0.163592		41.5958	1.49123	1.7832	1.94858	1.79913	1.96887			0.378225	0.890443	1.87136	0.359753	1.91654			0.0784749	0.178974	0.232707		0.195641
	42.0117	4.6224	6.8706	7.93877	7.02157	8.29123			0.792344	2.12606	3.37648	0.778521	3.47423			0.178288	0.116527	0.340095		0.164026		42.0117	1.51255	1.78487	2.01168	1.79577	1.96466			0.355727	0.891065	1.83113	0.360736	1.91382			0.0516779	0.203724	0.190146		0.196098
	42.4318	4.63958	6.89167	7.96285	7.00919	8.28012			0.772021	2.10537	3.37881	0.781756	3.47183			0.157753	0.107257	0.355724		0.164463		42.4318	1.52761	1.78498	2.06408	1.7924	1.96045			0.353679	0.891211	1.80114	0.361727	1.91109			0.118027	0.233356	0.18753		0.196559
	42.8561	4.64813	6.87572	8.00514	6.99681	8.26897			0.755252	2.07303	3.38496	0.785012	3.46942			0.125555	0.10575	0.379065		0.164904		42.8561	1.55066	1.78133	2.10636	1.78903	1.95625			0.31955	0.906213	1.79028	0.362725	1.90835			0.169055	0.266293	0.190457		0.197023
	43.2847	4.67449	6.82997	8.04051	6.98444	8.25779			0.742369	2.04439	3.39534	0.788288	3.467			0.100046	0.111219	0.374796		0.165347		43.2847	1.57673	1.77767	2.10762	1.78567	1.95205			0.320586	0.933266	1.79557	0.363731	1.9056			0.174085	0.288577	0.209363		0.197489
	43.7176	4.71009	6.77502	8.05267	6.97207	8.24657			0.727706	2.02639	3.41307	0.791586	3.46456			0.099946	0.125268	0.360541		0.165793		43.7176	1.57799	1.7698	2.09956	1.7823	1.94785			0.329852	0.942203	1.83	0.364744	1.90285			0.160821	0.295122	0.243647		0.197959
	44.1547	4.74009	6.72587	8.03548	6.95971	8.23532			0.720308	2.02655	3.42517	0.794904	3.46211			0.108441	0.148743	0.342454		0.166242		44.1547	1.56342	1.75871	2.08018	1.77894	1.94366			0.381467	0.933657	1.86742	0.365765	1.90009			0.156168	0.298936	0.291088		0.198432
	44.5963	4.75193	6.69925	8.0017	6.94735	8.22404			0.723548	2.04744	3.42818	0.798243	3.45964			0.122638	0.166068	0.321575		0.166694		44.5963	1.55416	1.74705	2.06546	1.77558	1.93947			0.410482	0.906864	1.88531	0.366793	1.89733			0.12347	0.283654	0.328029		0.198907
	45.0422	4.73529	6.68932	7.958	6.93501	8.21272			0.732919	2.07511	3.41973	0.801603	3.45716			0.129895	0.181171	0.32852		0.167148		45.0422	1.56086	1.73591	2.04113	1.77222	1.93528			0.43317	0.852886	1.89163	0.367829	1.89456			0.173666	0.264069	0.347611		0.199386
	45.4927	4.70566	6.70736	7.90923	6.92268	8.20137			0.756905	2.10103	3.40637	0.804984	3.45466			0.138084	0.189281	0.351266		0.167606		45.4927	1.58405	1.72064	2.00092	1.76886	1.9311			0.460556	0.782891	1.87613	0.368872	1.89178			0.239224	0.232401	0.348373		0.199868
	45.9476	4.66742	6.73476	7.86969	6.91036	8.19			0.783313	2.13154	3.39604	0.808386	3.45215			0.14104	0.205665	0.370995		0.168067		45.9476	1.60287	1.70383	1.97936	1.76551	1.92693			0.448854	0.729533	1.84231	0.369923	1.88899			0.241575	0.18524	0.328475		0.200353
	46.4071	4.64462	6.746	7.83552	6.89805	8.17859			0.797798	2.14374	3.3785	0.811808	3.44963			0.138278	0.229032	0.381412		0.16853		46.4071	1.60838	1.70351	1.94517	1.76216	1.92276			0.455773	0.718052	1.81358	0.370981	1.8862			0.184857	0.151176	0.304285		0.20084
	46.8711	4.65164	6.75934	7.82474	6.88576	8.16715			0.80833	2.14595	3.36923	0.815252	3.44709			0.141937	0.251477	0.39274		0.168997		46.8711	1.59504	1.71242	1.89838	1.75882	1.9186			0.441799	0.724634	1.77436	0.372047	1.88341			0.126618	0.135966	0.294192		0.201331
	47.3398	4.67226	6.75889	7.7965	6.87349	8.15568			0.812402	2.13664	3.35477	0.818716	3.44454			0.152525	0.253948	0.397687		0.169466		47.3398	1.54531	1.73947	1.86195	1.75547	1.91444			0.439626	0.74	1.7321	0.373121	1.8806			0.0846228	0.144397	0.289842		0.201825
	47.8132	4.70704	6.75532	7.78606	6.86123	8.14418			0.808569	2.11111	3.33009	0.822201	3.44197			0.151296	0.243504	0.387506		0.169938		47.8132	1.4842	1.78055	1.81975	1.75214	1.9103			0.423048	0.770918	1.69941	0.374202	1.8778			0.152797	0.186502	0.279307		0.202322
	48.2914	4.71684	6.74291	7.80311	6.84899	8.13266			0.798252	2.08958	3.31151	0.825707	3.43938			0.127757	0.222678	0.389125		0.170413		48.2914	1.44637	1.8077	1.78746	1.7488	1.90616			0.449766	0.790677	1.68353	0.375292	1.87498			0.191848	0.239919	0.258431		0.202822
	48.7743	4.7068	6.72297	7.82534	6.83677	8.12111			0.792163	2.06858	3.2914	0.829234	3.43679			0.0945333	0.190089	0.40842		0.170892		48.7743	1.42848	1.81858	1.75676	1.74548	1.90203			0.458759	0.799416	1.70579	0.376389	1.87217			0.199629	0.285547	0.233039		0.203324
	49.262	4.67941	6.6978	7.85873	6.82458	8.10953			0.791352	2.06185	3.28497	0.832781	3.43418			0.0745797	0.153106	0.425149		0.171373		49.262	1.43187	1.81864	1.71861	1.74216	1.89791			0.488294	0.807764	1.74628	0.377493	1.86934			0.192411	0.299294	0.195085		0.20383
	49.7547	4.63801	6.68606	7.89057	6.8124	8.09793			0.802215	2.0825	3.29698	0.83635	3.43155			0.0718634	0.122438	0.445675		0.171856		49.7547	1.4402	1.81547	1.70157	1.73884	1.8938			0.474533	0.823174	1.79217	0.378606	1.86652			0.186514	0.288628	0.180105		0.204339
	50.2522	4.60591	6.68935	7.92531	6.80025	8.08631			0.842566	2.13249	3.32013	0.839939	3.42891			0.0986023	0.10323	0.458789	0.100555	0.172343		50.2522	1.45446	1.81401	1.74813	1.73553	1.88969			0.471188	0.827501	1.84209	0.379726	1.86368			0.183697	0.272054	0.195734	0.159346	0.204851
	50.7547	4.59313	6.70216	7.93742	6.78813	8.07466			0.888623	2.17755	3.34153	0.843548	3.42626			0.148816	0.100679	0.451245	0.101191	0.172833		50.7547	1.46832	1.81887	1.7962	1.73223	1.8856			0.442773	0.820176	1.90929	0.380854	1.86085			0.206686	0.253498	0.209491	0.159529	0.205366
	51.2623	4.61105	6.72283	7.94916	6.77603	8.06299			0.922774	2.20691	3.35505	0.847179	3.42359			0.181919	0.0990316	0.431653	0.101831	0.173326		51.2623	1.5089	1.81972	1.8329	1.72894	1.88152			0.42257	0.828839	1.9644	0.38199	1.85801			0.235619	0.261567	0.205023	0.159714	0.205884
	51.7749	4.65625	6.73509	7.93718	6.76397	8.0513			0.935533	2.21538	3.36961	0.85083	3.42091			0.190804	0.107746	0.410011	0.102476	0.173821		51.7749	1.563	1.81009	1.85839	1.72565	1.87745			0.3705	0.823025	1.99985	0.383134	1.85517			0.23095	0.292172	0.192837	0.1599	0.206404
	52.2926	4.71511	6.73973	7.91583	6.75193	8.03959			0.917456	2.21109	3.39096	0.854502	3.41821			0.174241	0.11887	0.393235	0.103126	0.17432		52.2926	1.61021	1.78942	1.84296	1.72237	1.8734			0.34	0.833548	2.02088	0.384286	1.85232			0.203137	0.333336	0.188271	0.160087	0.206928
	52.8156	4.78351	6.73977	7.86873	6.73993	8.02786			0.866872	2.20262	3.40794	0.858194	3.4155			0.127366	0.122802	0.399215	0.103781	0.174821		52.8156	1.63171	1.76266	1.7977	1.7191	1.86935			0.303562	0.896517	2.00883	0.385446	1.84947			0.173206	0.366617	0.205827	0.160276	0.207455
	53.3437	4.82422	6.73976	7.85354	6.72795	8.01612			0.823959	2.20866	3.41207	0.861907	3.41278			0.0927114	0.10568	0.423549	0.104441	0.175326		53.3437	1.60977	1.74228	1.78343	1.71584	1.86532			0.286132	0.973203	1.96314	0.386613	1.84662			0.157143	0.358772	0.240273	0.160466	0.207985
	53.8772	4.83571	6.73418	7.84228	6.71602	8.00435			0.799039	2.21258	3.3813	0.86564	3.41004			0.0756709	0.105972	0.448755	0.105106	0.175833		53.8772	1.54778	1.7324	1.76115	1.71258	1.8613			0.311206	1.05101	1.9239	0.387789	1.84376			0.125401	0.31506	0.266168	0.160657	0.208518
	54.4159	4.79188	6.73801	7.86198	6.70411	7.99257			0.790368	2.20027	3.33848	0.869394	3.40729			0.0634013	0.113808	0.465072	0.105776	0.176343		54.4159	1.48851	1.72569	1.77985	1.70934	1.8573			0.361191	1.08702	1.90303	0.388973	1.84091			0.14132	0.25868	0.274584	0.16085	0.209053
	54.9601	4.70282	6.73818	7.88846	6.69225	7.98077			0.824035	2.1815	3.3029	0.873168	3.40452			0.0758123	0.127435	0.48409	0.106451	0.176856		54.9601	1.44212	1.72575	1.82815	1.7061	1.85331			0.422014	1.05588	1.90394	0.390164	1.83805			0.207323	0.238716	0.27773	0.161043	0.209592
	55.5097	4.63247	6.73931	7.87944	6.68042	7.96896			0.865428	2.17018	3.2846	0.876962	3.40174			0.0794075	0.143231	0.50497	0.107131	0.177372		55.5097	1.43344	1.7144	1.82587	1.70288	1.84933			0.460249	0.970551	1.93793	0.391364	1.83519			0.202146	0.231246	0.26571	0.161239	0.210134
	56.0648	4.58771	6.7463	7.85943	6.66864	7.95713			0.905678	2.15912	3.28935	0.880777	3.39895			0.0693545	0.147272	0.515141	0.107816	0.17789		56.0648	1.4552	1.70298	1.79595	1.69967	1.84537			0.478706	0.883761	1.96383	0.392571	1.83232			0.13312	0.2225	0.283535	0.161435	0.210678
	56.6254	4.58577	6.76136	7.84456	6.65689	7.94529			0.941494	2.15737	3.30905	0.884611	3.39614			0.0725423	0.152325	0.4837	0.108506	0.178412		56.6254	1.48507	1.68165	1.74148	1.69646	1.84143			0.450181	0.847602	1.97725	0.393787	1.82946			0.120236	0.210641	0.333082	0.161633	0.211226
	57.1917	4.61548	6.76992	7.84279	6.64519	7.93344			0.958261	2.13915	3.325	0.888466	3.39333			0.090742	0.152061	0.424909	0.109201	0.178936		57.1917	1.5106	1.65985	1.69075	1.69327	1.8375			0.426785	0.893326	1.99258	0.39501	1.8266			0.136014	0.193109	0.401926	0.161832	0.211776
	57.7636	4.65664	6.75819	7.85682	6.63353	7.92158			0.961204	2.11387	3.33499	0.892341	3.39049			0.124603	0.157138	0.352674	0.109901	0.179464		57.7636	1.50648	1.66361	1.68314	1.69009	1.83359			0.375572	0.962152	1.95811	0.396242	1.82373			0.16855	0.175369	0.489578	0.162032	0.21233
	58.3412	4.67666	6.70722	7.88049	6.62192	7.90971			0.95007	2.10105	3.3409	0.896236	3.38765			0.14703	0.201199	0.310662	0.110607	0.179994		58.3412	1.48357	1.68281	1.6945	1.68693	1.8297			0.381108	1.01183	1.86968	0.397482	1.82086			0.164496	0.181367	0.531903	0.162234	0.212886
	58.9247	4.6696	6.6405	7.89898	6.61036	7.89784			0.924529	2.093	3.33346	0.90015	3.38479			0.154497	0.254166	0.310904	0.111317	0.180527		58.9247	1.46334	1.70304	1.73236	1.68377	1.82582			0.399061	1.03129	1.78663	0.39873	1.818			0.114881	0.190755	0.486455	0.162437	0.213445
	59.5139	4.64082	6.57395	7.89187	6.59884	7.88595			0.89626	2.09404	3.31794	0.904085	3.38192			0.139694	0.281946	0.320468	0.112033	0.181063		59.5139	1.45792	1.71408	1.75645	1.68063	1.82196			0.456234	1.0259	1.69811	0.399986	1.81513			0.10944	0.21414	0.344366	0.162642	0.214007
	60.109	4.6126	6.55482	7.89383	6.58738	7.87406			0.872274	2.08752	3.31343	0.908039	3.37903			0.104572	0.289037	0.347391	0.112754	0.181601		60.109	1.48576	1.6814	1.76483	1.6775	1.81812			0.469976	1.04196	1.66513	0.40125	1.81227			0.110877	0.234071	0.209532	0.162847	0.214572
	60.7101	4.62207	6.57782	7.89888	6.57596	7.86217			0.864413	2.07169	3.32375	0.912012	3.37613			0.104886	0.260423	0.388145	0.11348	0.182143		60.7101	1.5326	1.65101	1.77899	1.67439	1.8143			0.481491	1.0576	1.66097	0.402522	1.8094			0.104541	0.258439	0.135995	0.163054	0.21514
	61.3172	4.64653	6.6086	7.87431	6.5646	7.85027			0.882572	2.07399	3.33882	0.916005	3.37322			0.120221	0.224527	0.429795	0.114212	0.182687		61.3172	1.57173	1.62727	1.76928	1.67129	1.8105			0.507547	1.05607	1.65291	0.403802	1.80654			0.0971895	0.261295	0.155043	0.163263	0.215711
	61.9304	4.69837	6.62125	7.86732	6.5533	7.83836			0.92167	2.08939	3.353	0.920017	3.3703			0.134554	0.214408	0.455428	0.114948	0.183234		61.9304	1.58911	1.62397	1.77475	1.6682	1.80672			0.513707	1.01973	1.63894	0.40509	1.80367			0.124652	0.24464	0.206801	0.163473	0.216284
	62.5497	4.76076	6.62235	7.8494	6.54205	7.82646			0.989692	2.12017	3.36422	0.924049	3.36736			0.149471	0.212935	0.459058	0.11569	0.183783		62.5497	1.57873	1.63728	1.76528	1.66513	1.80296			0.527573	0.951403	1.6309	0.406386	1.80081			0.151073	0.207899	0.267239	0.163684	0.21686
	63.1752	4.80544	6.62421	7.85038	6.53085	7.81456			1.04401	2.14518	3.3847	0.9281	3.36441			0.154574	0.21583	0.449053	0.116437	0.184336		63.1752	1.54152	1.64568	1.77911	1.66208	1.79922			0.510486	0.909007	1.64777	0.407691	1.79795			0.166312	0.163962	0.29003	0.163896	0.217439
	63.807	4.81518	6.60795	7.83028	6.51972	7.80265			1.04981	2.15295	3.38746	0.932169	3.36145			0.136423	0.220573	0.416242	0.11719	0.184891		63.807	1.4724	1.65264	1.81176	1.65904	1.79551			0.476471	0.89373	1.71358	0.409004	1.7951			0.147255	0.12611	0.283157	0.16411	0.218021
	64.445	4.77401	6.53904	7.77198	6.50864	7.79075			1.01304	2.17532	3.37179	0.936258	3.35848			0.0962743	0.188079	0.392645	0.117948	0.185449		64.445	1.37979	1.64376	1.8262	1.65601	1.79181			0.466964	0.892852	1.78317	0.410324	1.79224			0.146055	0.105615	0.302096	0.164325	0.218606
	65.0895	4.70414	6.5122	7.79309	6.49763	7.77885			0.986755	2.21016	3.35412	0.940365	3.35549			0.0781403	0.172846	0.385671	0.118711	0.18601		65.0895	1.31139	1.63039	1.84124	1.65301	1.78814			0.458967	0.918462	1.7977	0.411653	1.78939			0.155554	0.140094	0.372427	0.164541	0.219193
	65.7404	4.65896	6.53809	7.80938	6.48668	7.76696			0.998768	2.24742	3.33039	0.944491	3.3525			0.0662212	0.189006	0.399529	0.119479	0.186573		65.7404	1.28955	1.62495	1.84502	1.65002	1.78449			0.46496	0.950266	1.81163	0.41299	1.78654			0.205391	0.177983	0.412296	0.164759	0.219783
	66.3978	4.6473	6.58219	7.77656	6.47579	7.75507			1.04171	2.26726	3.31022	0.948635	3.34949			0.0695613	0.209165	0.416746	0.120253	0.187139		66.3978	1.32398	1.60916	1.86992	1.64704	1.78086			0.471703	0.958001	1.82433	0.414335	1.7837			0.237158	0.175813	0.409188	0.164978	0.220376
	67.0618	4.69424	6.63482	7.77796	6.46497	7.74319			1.08225	2.2503	3.3226	0.952798	3.34647			0.0838178	0.233521	0.405398	0.121032	0.187708		67.0618	1.39626	1.60222	1.88156	1.64409	1.77726			0.462133	0.915691	1.83059	0.415689	1.78085			0.234016	0.183358	0.334145	0.165199	0.220971
	67.7324	4.80012	6.66991	7.81709	6.45421	7.73132			1.06707	2.21586	3.35986	0.956978	3.34343			0.0877173	0.221549	0.374329	0.121817	0.188279		67.7324	1.47126	1.61868	1.86644	1.64115	1.77368			0.452604	0.86479	1.81108	0.41705	1.77802			0.199581	0.189883	0.230631	0.165421	0.22157
	68.4097	4.91328	6.61469	7.81836	6.44353	7.71946			1.01153	2.15907	3.35498	0.961177	3.34039			0.110558	0.208165	0.350536	0.122607	0.188853		68.4097	1.53116	1.63684	1.82157	1.63823	1.77013			0.462992	0.867595	1.74903	0.418419	1.77518			0.16578	0.189682	0.168109	0.165644	0.22217
	69.0938	5.00342	6.52321	7.83963	6.43291	7.70761			0.981753	2.12194	3.33674	0.965394	3.33734			0.119544	0.186662	0.349567	0.123402	0.18943		69.0938	1.53718	1.64712	1.78555	1.63533	1.7666			0.444804	0.876199	1.71806	0.419797	1.77235			0.12114	0.206217	0.142695	0.165868	0.222774
	69.7847	5.05518	6.47176	7.85594	6.42236	7.69577			0.974036	2.10107	3.31126	0.969628	3.33427			0.135283	0.16696	0.357511	0.124203	0.190009		69.7847	1.5042	1.65891	1.81443	1.63244	1.76309			0.438389	0.879591	1.74277	0.421183	1.76953			0.114125	0.2352	0.214297	0.166094	0.22338
	70.4826	5.06104	6.44264	7.81887	6.41189	7.68394			0.962972	2.12398	3.28673	0.97388	3.33119			0.138742	0.155076	0.361432	0.125009	0.190591		70.4826	1.44987	1.68474	1.91267	1.62958	1.75962			0.446943	0.867492	1.79655	0.422576	1.76671			0.144365	0.260293	0.332423	0.166321	0.223989
	71.1874	5.01012	6.49295	7.86035	6.40148	7.67213			0.933125	2.18839	3.30477	0.978149	3.3281			0.13701	0.143975	0.384238	0.125821	0.191175		71.1874	1.43992	1.72025	2.01969	1.62674	1.75616			0.428016	0.839148	1.79723	0.423978	1.7639			0.162653	0.21902	0.464398	0.16655	0.2246
	71.8993	4.92418	6.52047	7.84328	6.39116	7.66033			0.917581	2.27761	3.32457	0.982435	3.32501			0.107247	0.199471	0.434208	0.126638	0.191762		71.8993	1.46994	1.74613	2.05817	1.62391	1.75274			0.419711	0.786336	1.78118	0.425388	1.76109			0.21311	0.180672	0.465755	0.166779	0.225213
	72.6183	4.84596	6.52562	7.84951	6.3809	7.64855			0.929425	2.30783	3.34938	0.986738	3.3219			0.0867841	0.268028	0.471366	0.127461	0.192351		72.6183	1.4942	1.72339	2.01948	1.62111	1.74934			0.470151	0.72143	1.76493	0.426806	1.75829			0.241096	0.142942	0.418639	0.167011	0.22583
	73.3445	4.7524	6.54552	7.82236	6.37073	7.63679			0.993472	2.22582	3.35344	0.991058	3.31878			0.113551	0.317348	0.463158	0.128289	0.192943		73.3445	1.48908	1.68096	1.96955	1.61833	1.74597			0.519646	0.731909	1.803	0.428232	1.7555			0.206626	0.155308	0.322723	0.167243	0.226448
	74.0779	4.66484	6.56834	7.79202	6.36063	7.62505			1.04606	2.10437	3.31952	0.995394	3.31565			0.144426	0.288405	0.426633	0.129122	0.193537		74.0779	1.44088	1.65416	1.89381	1.61557	1.74263			0.513349	0.813725	1.83628	0.429666	1.75271			0.162536	0.142956	0.264935	0.167477	0.22707
	74.8187	4.62975	6.57953	7.75035	6.35061	7.61333			1.0695	2.04885	3.26589	0.999747	3.31251			0.158527	0.222271	0.408416	0.129961	0.194134		74.8187	1.39266	1.67354	1.81408	1.61283	1.73931			0.508886	0.898926	1.85604	0.431107	1.74993			0.194845	0.200925	0.209705	0.167712	0.227693
	75.5669	4.65372	6.54977	7.72861	6.34067	7.60163			1.04581	2.08648	3.21118	1.00412	3.30936			0.155004	0.185795	0.400573	0.130806	0.194733		75.5669	1.38801	1.70026	1.69258	1.61011	1.73603			0.532772	0.911367	1.82529	0.432557	1.74716			0.197629	0.271255	0.155677	0.167949	0.228319
	76.3225	4.68124	6.54516	7.7509	6.33081	7.58996			1.00795	2.11079	3.16553	1.0085	3.3062			0.13753	0.180047	0.370746	0.131656	0.195334		76.3225	1.46092	1.71546	1.64734	1.60741	1.73277			0.583478	0.88203	1.77949	0.434015	1.74439			0.126096	0.255789	0.1987	0.168186	0.228948
	77.0858	4.6835	6.54573	7.81744	6.32104	7.57831			0.993584	2.09881	3.14923	1.0129	3.30303			0.118935	0.209328	0.332782	0.132511	0.195938		77.0858	1.56954	1.71145	1.69456	1.60474	1.72954			0.597129	0.870284	1.75171	0.435481	1.74164			0.102906	0.216434	0.315694	0.168425	0.229578
	77.8566	4.67051	6.52795	7.86585	6.31135	7.56669			1.03488	2.09525	3.17507	1.01732	3.29986			0.149713	0.224211	0.323198	0.133372	0.196544		77.8566	1.61259	1.71266	1.79705	1.60208	1.72635			0.565561	0.860884	1.75798	0.436954	1.73889			0.181867	0.187183	0.394097	0.168666	0.230211
	78.6352	4.67994	6.45469	7.85405	6.30174	7.55509			1.07033	2.14929	3.22837	1.02175	3.29667			0.149759	0.228539	0.334	0.134239	0.197153		78.6352	1.53859	1.70084	1.85675	1.59945	1.72318			0.510325	0.820511	1.72376	0.438436	1.73615			0.214863	0.118409	0.387127	0.168908	0.230847
	79.4215	4.69425	6.39919	7.7715	6.29222	7.54353			1.05857	2.18882	3.24751	1.0262	3.29347			0.127024	0.228993	0.338864	0.135111	0.197763		79.4215	1.44238	1.68734	1.86659	1.59685	1.72004			0.454667	0.792606	1.64144	0.439925	1.73342			0.198352	0.15176	0.31096	0.169151	0.231484
	80.2158	4.71444	6.42528	7.77187	6.28279	7.532			1.05085	2.1848	3.26887	1.03066	3.29027			0.0853587	0.240507	0.340033	0.135989	0.198376		80.2158	1.42797	1.68144	1.86848	1.59426	1.71693			0.406198	0.819107	1.56203	0.441423	1.7307			0.125273	0.191887	0.261289	0.169395	0.232124
	81.0179	4.72961	6.45608	7.73828	6.27344	7.52049			1.05539	2.14696	3.26634	1.03513	3.28706			0.0495461	0.259587	0.354973	0.136872	0.198991		81.0179	1.4874	1.71114	1.88929	1.59171	1.71386			0.347795	0.862048	1.57421	0.442928	1.72799			0.117462	0.255239	0.327578	0.16964	0.232766
	81.8281	4.76375	6.4942	7.71891	6.26418	7.50902			1.05604	2.12251	3.27533	1.03962	3.28384			0.0314357	0.243345	0.352242	0.13776	0.199609		81.8281	1.53388	1.75296	1.91285	1.58917	1.71081			0.352668	0.851811	1.66609	0.44444	1.72529			0.121168	0.363303	0.354798	0.169887	0.23341
	82.6464	4.78065	6.48328	7.68916	6.25501	7.49759			1.06178	2.13433	3.28227	1.04413	3.28061			0.072971	0.224828	0.330829	0.138655	0.200228		82.6464	1.50162	1.74264	1.95127	1.58666	1.7078			0.405435	0.843037	1.7292	0.445961	1.7226			0.214953	0.399156	0.299979	0.170136	0.234056
	83.4728	4.74609	6.44157	7.61527	6.24594	7.48619			1.08977	2.11202	3.27695	1.04865	3.27737			0.137051	0.242462	0.314095	0.139554	0.20085		83.4728	1.41883	1.67181	1.98359	1.58417	1.70482			0.468506	0.824746	1.76369	0.447489	1.71993			0.291353	0.311945	0.237524	0.170385	0.234705
	84.3076	4.69891	6.4391	7.59288	6.23695	7.47483			1.11659	2.08778	3.27313	1.05318	3.27413			0.172744	0.239611	0.319305	0.14046	0.201473		84.3076	1.3609	1.62015	2.02824	1.58171	1.70187			0.473755	0.824401	1.75182	0.449025	1.71726			0.215343	0.218554	0.320961	0.170636	0.235355
	85.1506	4.66072	6.4392	7.57297	6.22806	7.46351			1.09811	2.08054	3.26137	1.05772	3.27088			0.181845	0.256589	0.352455	0.141371	0.202099		85.1506	1.35637	1.60575	2.02975	1.57927	1.69895			0.43644	0.834853	1.71507	0.450568	1.7146			0.213069	0.226453	0.454802	0.170888	0.236007
	86.0021	4.67651	6.39794	7.58737	6.21926	7.45223			1.03516	2.12255	3.25313	1.06228	3.26762			0.135312	0.250441	0.417892	0.142287	0.202727		86.0021	1.41399	1.59802	1.96859	1.57686	1.69607			0.432903	0.85493	1.70989	0.452119	1.71196			0.19633	0.292911	0.37359	0.171141	0.236661
	86.8622	4.66976	6.349	7.65852	6.21055	7.44099			0.976776	2.17296	3.25173	1.06685	3.26436			0.0648065	0.240656	0.466228	0.143209	0.203356		86.8622	1.45751	1.54749	1.82397	1.57447	1.69321			0.459975	0.851747	1.72804	0.453678	1.70933			0.137991	0.306747	0.230928	0.171396	0.237318
	87.7308	4.62138	6.33189	7.65203	6.20194	7.42979			0.959444	2.20814	3.22931	1.07143	3.26109			0.0312616	0.198323	0.466384	0.144136	0.203988		87.7308	1.43629	1.47378	1.72564	1.57211	1.6904			0.478189	0.799444	1.74187	0.455244	1.70671			0.133549	0.276968	0.184117	0.171652	0.237976
	88.6081	4.60739	6.32843	7.55946	6.19342	7.41864			0.994852	2.20068	3.20579	1.07603	3.25781			0.0929952	0.128914	0.425755	0.145069	0.204621		88.6081	1.43931	1.49576	1.72316	1.56978	1.68761			0.434823	0.792433	1.70871	0.456818	1.7041			0.199641	0.249161	0.272318	0.171909	0.238636
	89.4942	4.62404	6.31242	7.4455	6.185	7.40753			1.06465	2.2178	3.20506	1.08063	3.25453			0.192352	0.122812	0.414865	0.146008	0.205257		89.4942	1.49726	1.59491	1.78296	1.56747	1.68486			0.40531	0.838452	1.70711	0.458399	1.70151			0.189688	0.22142	0.333091	0.172167	0.239297
	90.3891	4.65228	6.3279	7.44664	6.17668	7.39648			1.1072	2.25388	3.18462	1.08525	3.25124			0.247393	0.160978	0.452996	0.146952	0.205894		90.3891	1.51552	1.6759	1.83388	1.56519	1.68214			0.43873	0.877691	1.79023	0.459987	1.69893			0.134923	0.226036	0.320848	0.172426	0.239961
	91.293	4.70941	6.36014	7.57387	6.16845	7.38546			1.08468	2.22158	3.13072	1.08988	3.24794			0.201551	0.179235	0.457509	0.147901	0.206533		91.293	1.46678	1.6948	1.80137	1.56293	1.67946			0.511866	0.83191	1.85631	0.461583	1.69636			0.143815	0.29664	0.333065	0.172687	0.240626
	92.2059	4.77862	6.3439	7.67371	6.16032	7.3745			1.04267	2.21427	3.08179	1.09452	3.24464			0.177051	0.179501	0.415288	0.148856	0.207174		92.2059	1.39747	1.69762	1.77011	1.5607	1.67681			0.581353	0.838334	1.81407	0.463185	1.69381			0.206346	0.305017	0.340219	0.172949	0.241293
	93.128	4.78392	6.32328	7.66618	6.15229	7.36359			1.06433	2.22307	3.07193	1.09917	3.24134			0.208211	0.219262	0.353075	0.149816	0.207816		93.128	1.42735	1.69667	1.77089	1.5585	1.67419			0.582251	0.849706	1.70492	0.464795	1.69128			0.164668	0.275358	0.347664	0.173212	0.241961
	94.0593	4.71635	6.37323	7.55399	6.14436	7.35274			1.08016	2.17988	3.09699	1.10383	3.23803			0.160278	0.21029	0.326691	0.150782	0.20846		94.0593	1.50216	1.68424	1.70382	1.55632	1.67161			0.541954	0.840147	1.64381	0.466413	1.68875			0.25508	0.206247	0.279652	0.173477	0.242631
	94.9999	4.63601	6.43072	7.43092	6.13653	7.34193			1.03333	2.12288	3.15938	1.1085	3.23471			0.0913405	0.222915	0.375397	0.151754	0.209106		94.9999	1.55028	1.65912	1.65727	1.55417	1.66906			0.497049	0.845327	1.62461	0.468037	1.68625			0.213842	0.177301	0.212492	0.173742	0.243303
	95.9499	4.61587	6.35982	7.34763	6.12881	7.33118			1.02747	2.16072	3.20801	1.11318	3.23139			0.120505	0.240948	0.410686	0.152731	0.209753		95.9499	1.53103	1.6408	1.67816	1.55205	1.66655			0.515793	0.875069	1.64514	0.469668	1.68375			0.131713	0.254328	0.29642	0.174009	0.243976
	96.9094	4.67632	6.26685	7.36255	6.12118	7.32049			1.05747	2.16308	3.20582	1.11787	3.22807			0.138112	0.24723	0.369926	0.153713	0.210402		96.9094	1.48309	1.62184	1.68729	1.54995	1.66407			0.536692	0.865397	1.71742	0.471307	1.68128			0.20049	0.320828	0.378959	0.174277	0.24465
	97.8785	4.69951	6.23739	7.40149	6.11365	7.30986			1.07516	2.13658	3.16817	1.12256	3.22475			0.134117	0.208699	0.318734	0.154701	0.211052		97.8785	1.45959	1.59828	1.68269	1.54789	1.66163			0.494439	0.910041	1.72414	0.472952	1.67882			0.315202	0.307264	0.345842	0.174546	0.245326
	98.8572	4.73344	6.24847	7.41891	6.10622	7.29928			1.04615	2.13237	3.14444	1.12727	3.22142			0.173866	0.229995	0.344201	0.155694	0.211704		98.8572	1.40432	1.60852	1.73373	1.54585	1.65922			0.436352	0.9746	1.66898	0.474604	1.67637			0.154313	0.255298	0.329462	0.174816	0.246003
	99.8458	4.8298	6.26088	7.39411	6.0989	7.28877			1.03511	2.11283	3.13273	1.13198	3.21808			0.187411	0.240838	0.390389	0.156693	0.212357		99.8458	1.35096	1.62381	1.81661	1.54383	1.65684			0.502212	0.941307	1.68024	0.476263	1.67395			0.108797	0.173381	0.383156	0.175087	0.246682
	100.844	4.82991	6.27371	7.34045	6.09168	7.27832			1.0606	2.13761	3.14478	1.13671	3.21475			0.180858	0.189473	0.440345	0.157697	0.213011		100.844	1.39408	1.66451	1.79906	1.54185	1.65451			0.578164	0.937597	1.73039	0.477928	1.67154			0.185432	0.17117	0.388377	0.17536	0.247361
	101.853	4.69737	6.28216	7.3619	6.08456	7.26793			1.09451	2.15619	3.16942	1.14143	3.21141			0.137236	0.187187	0.520643	0.158706	0.213667		101.853	1.46766	1.68495	1.68717	1.53989	1.6522			0.55713	0.987407	1.69394	0.4796	1.66914			0.180364	0.210937	0.353652	0.175634	0.248042
	102.871	4.60984	6.28944	7.4569	6.07754	7.2576			1.10021	2.15088	3.19094	1.14617	3.20807			0.0914339	0.173197	0.532648	0.159721	0.214323		102.871	1.50132	1.64298	1.64437	1.53796	1.64994			0.529888	0.938813	1.62697	0.481279	1.66677			0.156118	0.277655	0.316981	0.175908	0.248724
	103.9	4.63724	6.26863	7.45749	6.07063	7.24734			1.08529	2.13474	3.22087	1.15091	3.20473			0.0802271	0.177253	0.488001	0.160741	0.214982		103.9	1.49329	1.59501	1.67644	1.53606	1.6477			0.545491	0.872472	1.63077	0.482964	1.66441			0.224512	0.21208	0.337515	0.176184	0.249407
	104.939	4.67357	6.23217	7.37918	6.06382	7.23715			1.0531	2.16201	3.26762	1.15566	3.20139			0.0796692	0.158944	0.436338	0.161766	0.215641		104.939	1.48234	1.55683	1.71806	1.53419	1.64551			0.556069	0.92846	1.65443	0.484656	1.66207			0.225736	0.139239	0.342393	0.176461	0.250091
	105.988	4.77387	6.22286	7.31108	6.05711	7.22702			1.10637	2.21141	3.1962	1.16041	3.19804			0.147614	0.213729	0.428891	0.162797	0.216301		105.988	1.49717	1.448	1.72469	1.53235	1.64334			0.519357	0.993497	1.67322	0.486354	1.65975			0.194136	0.176423	0.287865	0.176739	0.250776
	107.048	4.85735	6.23586	7.28469	6.05051	7.21697			1.16519	2.22713	3.14479	1.16517	3.1947			0.174021	0.22513	0.452144	0.163833	0.216962		107.048	1.52821	1.38455	1.68439	1.53053	1.64122			0.531391	0.938676	1.66674	0.488058	1.65744			0.117196	0.205211	0.240417	0.177018	0.251462
	108.119	4.83139	6.26556	7.2914	6.04401	7.20698			1.21493	2.15064	3.21061	1.16994	3.19135			0.212821	0.232734	0.450817	0.164874	0.217625		108.119	1.56249	1.42426	1.66491	1.52874	1.63912			0.593219	0.865281	1.68077	0.489768	1.65516			0.163488	0.287974	0.259308	0.177298	0.252149
	109.2	4.86046	6.29346	7.30166	6.03761	7.19707			1.22869	2.07641	3.21121	1.1747	3.18801			0.192715	0.285949	0.450364	0.16592	0.218288		109.2	1.5668	1.5246	1.59558	1.52698	1.63707			0.605083	0.838491	1.74755	0.491484	1.65289			0.203918	0.269276	0.236146	0.177579	0.252836
	110.292	4.84319	6.30879	7.31513	6.03132	7.18723			1.21599	2.11593	3.17784	1.17948	3.18466			0.142426	0.254493	0.424292	0.166972	0.218952		110.292	1.54524	1.62346	1.58267	1.52525	1.63505			0.584146	0.890952	1.72976	0.493207	1.65065			0.189728	0.249557	0.356509	0.177861	0.253524
	111.395	4.82982	6.30132	7.32776	6.02513	7.17746			1.24586	2.13612	3.24007	1.18425	3.18132			0.110853	0.214948	0.402644	0.168029	0.219617		111.395	1.54849	1.61644	1.7289	1.52355	1.63306			0.598117	0.961544	1.69201	0.494935	1.64842			0.163011	0.242076	0.41823	0.178144	0.254213
	112.509	4.84292	6.23513	7.31843	6.01904	7.16777			1.27799	2.1056	3.20434	1.18903	3.17797			0.116215	0.239376	0.427328	0.169091	0.220282		112.509	1.54311	1.53036	1.84615	1.52187	1.63111			0.56799	0.935779	1.73471	0.496669	1.64621			0.0847026	0.230564	0.367967	0.178428	0.254902
	113.634	4.77748	6.2227	7.30045	6.01306	7.15816			1.26644	2.11436	3.16744	1.19381	3.17463			0.216955	0.234187	0.426023	0.170158	0.220949		113.634	1.5333	1.54367	1.87692	1.52022	1.62919			0.535916	0.848756	1.75372	0.498408	1.64403			0.110498	0.260012	0.348002	0.178713	0.255592
	114.77	4.66673	6.24024	7.29655	6.00718	7.14862			1.27485	2.14872	3.1902	1.1986	3.17129			0.295907	0.23592	0.364247	0.17123	0.221616		114.77	1.52673	1.57157	1.83548	1.5186	1.62731			0.57395	0.901871	1.69694	0.500154	1.64186			0.151936	0.320915	0.322773	0.178999	0.256283
	115.918	4.68987	6.15073	7.31411	6.0014	7.13916			1.27874	2.2059	3.19998	1.20338	3.16795			0.267561	0.28998	0.337282	0.172307	0.222283		115.918	1.50958	1.51315	1.78679	1.51701	1.62546			0.595412	0.94809	1.64084	0.501904	1.63971			0.286189	0.364175	0.269381	0.179286	0.256974
	117.077	4.79375	6.09317	7.30076	5.99573	7.12978			1.25429	2.2139	3.20907	1.20817	3.16461			0.232181	0.266726	0.398078	0.173389	0.222951		117.077	1.49692	1.50237	1.72385	1.51545	1.62365			0.561918	0.912141	1.62634	0.503661	1.63759			0.139139	0.286931	0.295983	0.179574	0.257665
	118.248	4.85051	6.1656	7.21885	5.99015	7.12048			1.19638	2.15724	3.20213	1.21295	3.16128			0.212161	0.17951	0.415708	0.174476	0.22362		118.248	1.4951	1.60492	1.65578	1.51391	1.62187			0.560425	0.910775	1.58935	0.505422	1.63548			0.0345796	0.197397	0.210494	0.179863	0.258356
	119.43	4.82294	6.23	7.20061	5.98468	7.11126			1.22119	2.08339	3.21813	1.21774	3.15794			0.234181	0.215509	0.37399	0.175569	0.224289		119.43	1.51357	1.63706	1.7094	1.5124	1.62013			0.557551	0.897357	1.59382	0.507189	1.6334			0.156009	0.271901	0.145719	0.180153	0.259048
	120.625	4.74031	6.21598	7.30034	5.97932	7.10213			1.24952	2.02904	3.17909	1.22253	3.15461			0.193095	0.263846	0.440264	0.176666	0.224958		120.625	1.51669	1.5439	1.78269	1.51092	1.61842			0.480383	0.904689	1.71057	0.50896	1.63134			0.0992747	0.267122	0.225376	0.180443	0.25974
	121.831	4.72887	6.11711	7.28538	5.97405	7.09308			1.19142	2.1159	3.113	1.22732	3.15129			0.0760436	0.21786	0.505607	0.177768	0.225627		121.831	1.48622	1.50168	1.70698	1.50947	1.61674			0.483349	0.889347	1.75753	0.510737	1.6293			0.116479	0.236676	0.282362	0.180735	0.260431
	123.049	4.81851	6.16109	7.29776	5.96888	7.08411			1.17379	2.17641	3.15354	1.2321	3.14797			0.0852975	0.169149	0.463786	0.178874	0.226297		123.049	1.48744	1.52789	1.59682	1.50804	1.6151			0.527459	0.881818	1.75147	0.512519	1.62728			0.112054	0.27842	0.332736	0.181027	0.261123
	124.28	4.86768	6.20566	7.32601	5.96382	7.07523			1.18355	2.1697	3.14515	1.23689	3.14465			0.188184	0.178805	0.393553	0.179986	0.226967		124.28	1.48381	1.55082	1.7472	1.50665	1.61349			0.561702	0.892612	1.7779	0.514305	1.62528			0.217828	0.276441	0.255812	0.18132	0.261815
	125.522	4.70005	6.14709	7.32478	5.95885	7.06643			1.22311	2.24344	3.13639	1.24167	3.14134			0.182007	0.25098	0.299219	0.181102	0.227636		125.522	1.46281	1.54198	1.8044	1.50528	1.61192			0.607568	0.816654	1.70308	0.516096	1.62331			0.19202	0.267077	0.191204	0.181614	0.262507
	126.778	4.58283	6.11458	7.25761	5.95398	7.05772			1.24505	2.29488	3.1479	1.24645	3.13803			0.187422	0.277787	0.290003	0.182223	0.228306		126.778	1.42919	1.50746	1.51105	1.50393	1.61037			0.579911	0.90828	1.74302	0.517891	1.62135			0.247734	0.227916	0.218488	0.181909	0.263198
	128.045	4.70485	6.12283	7.2003	5.94922	7.0491			1.32456	2.2544	3.19859	1.25123	3.13473			0.226495	0.202246	0.426456	0.183349	0.228976		128.045	1.51506	1.48861	1.49669	1.50262	1.60886			0.546198	0.955674	1.77716	0.519691	1.61942			0.180469	0.21183	0.216171	0.182204	0.263889
	129.326	4.79749	6.11272	7.14716	5.94455	7.04057			1.35178	2.13929	3.18082	1.256	3.13143			0.168984	0.171594	0.44913	0.184479	0.229646		129.326	1.54368	1.52382	1.68247	1.50133	1.60739			0.568575	0.933247	1.69901	0.521495	1.61752			0.105757	0.129566	0.165202	0.1825	0.26458
	130.619	4.72553	6.14289	7.1632	5.93998	7.03213			1.23392	2.13095	3.10906	1.26077	3.12814			0.133862	0.157801	0.427701	0.185614	0.230315		130.619	1.48879	1.56297	1.69842	1.50007	1.60594			0.49954	0.97371	1.60166	0.523303	1.61563			0.100256	0.212039	0.208697	0.182797	0.26527
	131.925	4.62574	6.163	7.18809	5.9355	7.02378			1.22735	2.14087	3.09064	1.26554	3.12486			0.150198	0.171429	0.395278	0.186754	0.230985		131.925	1.47376	1.5383	1.69249	1.49883	1.60453			0.44806	0.905813	1.6007	0.525115	1.61377			0.120879	0.312711	0.273669	0.183095	0.26596
	133.245	4.56401	6.09865	7.19146	5.93113	7.01552			1.30381	2.04505	3.14144	1.2703	3.12158			0.214654	0.223125	0.341657	0.187897	0.231653		133.245	1.42809	1.48936	1.65875	1.49762	1.60315			0.460584	0.900912	1.75813	0.526931	1.61193			0.109355	0.32003	0.225294	0.183393	0.26665
	134.577	4.71381	6.01493	7.16077	5.92684	7.00735			1.31494	2.04713	3.17173	1.27505	3.11831			0.119421	0.194275	0.329209	0.189046	0.232322		134.577	1.53035	1.47741	1.58662	1.49644	1.6018			0.530045	0.91489	1.75894	0.528751	1.61011			0.264773	0.237644	0.203591	0.183692	0.267338
	135.923	4.83409	6.02182	7.13522	5.92266	6.99928			1.24685	2.19616	3.08231	1.2798	3.11505			0.116582	0.199166	0.391757	0.190198	0.23299		135.923	1.53784	1.43691	1.68806	1.49528	1.60049			0.568764	0.866115	1.73862	0.530574	1.60832			0.322554	0.143354	0.292107	0.183992	0.268026
	137.282	4.7472	6.11272	7.07854	5.91856	6.9913			1.22874	2.18713	3.051	1.28454	3.1118			0.151939	0.241496	0.38895	0.191355	0.233657		137.282	1.42393	1.46685	1.67628	1.49415	1.5992			0.540909	0.874944	1.68985	0.532401	1.60655			0.22922	0.0795227	0.41311	0.184292	0.268713
	138.655	4.69417	6.12362	7.16413	5.91456	6.98341			1.33609	2.14706	3.1456	1.28928	3.10855			0.154097	0.246747	0.32883	0.192517	0.234324		138.655	1.44362	1.48201	1.55495	1.49304	1.59795			0.531655	0.960732	1.58077	0.534231	1.60481			0.184695	0.205767	0.350711	0.184593	0.2694
	140.041	4.77271	6.15065	7.27078	5.91066	6.97561			1.26113	2.18094	3.20874	1.294	3.10532			0.177091	0.19142	0.355088	0.193682	0.23499		140.041	1.5121	1.49947	1.43668	1.49196	1.59672			0.539938	0.926673	1.61191	0.536064	1.60308			0.213242	0.355789	0.263452	0.184894	0.270085
	141.442	4.84317	6.13168	7.22717	5.90684	6.96792			1.27188	2.18014	3.1482	1.29872	3.10209			0.285023	0.219127	0.411732	0.194852	0.235656		141.442	1.49205	1.50629	1.5508	1.4909	1.59553			0.443362	0.91791	1.65471	0.5379	1.60138			0.267763	0.344846	0.290239	0.185196	0.27077
	142.856	4.67877	6.0847	7.151	5.90311	6.96031			1.36408	2.20199	3.0923	1.30343	3.09887			0.306412	0.184454	0.418765	0.196025	0.23632		142.856	1.44697	1.48474	1.68718	1.48987	1.59436			0.445896	0.944077	1.57828	0.539739	1.59971			0.142892	0.263747	0.520639	0.185499	0.271453
	144.285	4.56566	6.13602	7.14775	5.89948	6.95281			1.38362	2.23055	3.11678	1.30813	3.09567			0.260507	0.22882	0.45619	0.197203	0.236984		144.285	1.48172	1.58611	1.68516	1.48887	1.59323			0.51957	0.860284	1.63846	0.541581	1.59806			0.186443	0.228362	0.340321	0.185802	0.272135
	145.728	4.64533	6.20236	7.2052	5.89593	6.9454			1.30757	2.13481	3.13758	1.31282	3.09247			0.293008	0.234509	0.521815	0.198385	0.237647		145.728	1.52685	1.55607	1.61465	1.48788	1.59212			0.541463	0.84747	1.71838	0.543425	1.59643			0.14137	0.174738	0.224795	0.186105	0.272816
	147.185	4.69663	6.16217	7.22433	5.89247	6.93808			1.3262	1.98585	3.07426	1.3175	3.08928			0.244055	0.280831	0.407838	0.19957	0.238308		147.185	1.45396	1.51461	1.62997	1.48693	1.59104			0.569579	0.873721	1.69117	0.545272	1.59483			0.189224	0.177823	0.282005	0.186409	0.273495
	148.657	4.7272	6.20203	7.11638	5.8891	6.93087			1.41796	2.05799	3.16902	1.32217	3.08611			0.235675	0.278923	0.375641	0.20076	0.238969		148.657	1.52533	1.47345	1.66824	1.48599	1.58999			0.537346	0.829199	1.6799	0.547121	1.59325			0.172502	0.205897	0.201761	0.186713	0.274173
	150.143	4.7412	6.14258	7.03735	5.88582	6.92375			1.37969	2.13444	3.15315	1.32683	3.08294			0.255276	0.310348	0.427698	0.201953	0.239628		150.143	1.48931	1.50312	1.73205	1.48508	1.58897			0.60234	0.890227	1.62025	0.548972	1.59169			0.110016	0.265593	0.117277	0.187018	0.27485
	151.645	4.83712	6.15302	7.14004	5.88262	6.91673			1.29202	2.12015	3.05154	1.33148	3.07979			0.165957	0.292926	0.407767	0.203149	0.240286		151.645	1.39612	1.57168	1.71018	1.48419	1.58798			0.614491	0.790229	1.64174	0.550825	1.59016			0.171094	0.305136	0.266434	0.187323	0.275525
	153.161	4.81302	6.14163	7.14438	5.8795	6.90981			1.27112	2.12393	3.05666	1.33611	3.07665			0.170353	0.23862	0.38294	0.20435	0.240942		153.161	1.46345	1.49879	1.74861	1.48333	1.58701			0.628515	0.852565	1.71503	0.55268	1.58865			0.186811	0.31797	0.341567	0.187629	0.276199
	154.693	4.84216	6.1094	7.04096	5.87647	6.90298			1.37322	2.1241	3.11639	1.34073	3.07353			0.197446	0.216302	0.485067	0.205554	0.241598		154.693	1.52756	1.48906	1.73024	1.48249	1.58607			0.609262	0.95597	1.6413	0.554537	1.58716			0.179172	0.286942	0.402442	0.187934	0.27687
	156.24	4.76122	6.0666	7.14952	5.87351	6.89626			1.35087	2.13858	3.09544	1.34534	3.07041			0.174895	0.203828	0.490167	0.206761	0.242251		156.24	1.5326	1.55016	1.66361	1.48167	1.58516			0.671466	0.786265	1.61651	0.556394	1.5857			0.086681	0.252645	0.322417	0.18824	0.27754
	157.802	4.72706	6.01234	7.20751	5.87064	6.88963			1.39285	2.15287	3.12026	1.34993	3.06731			0.198796	0.21761	0.503342	0.207972	0.242903		157.802	1.48316	1.53684	1.76565	1.48087	1.58427			0.677892	0.871083	1.73516	0.558254	1.58427			0.227095	0.27447	0.300234	0.188547	0.278209
	159.38	4.89359	6.15328	7.09819	5.86785	6.88311			1.33792	2.18439	3.20495	1.35451	3.06423			0.183776	0.308986	0.462747	0.209186	0.243554		159.38	1.53392	1.5434	1.83605	1.4801	1.58341			0.624741	0.958597	1.663	0.560114	1.58285			0.112633	0.248386	0.308696	0.188853	0.278875
	160.974	4.78508	6.12203	6.97028	5.86513	6.87668			1.36076	2.12562	3.06253	1.35907	3.06116			0.225034	0.270834	0.428177	0.210403	0.244203		160.974	1.45113	1.49005	1.64936	1.47934	1.58257			0.642385	1.03335	1.6123	0.561975	1.58147			0.19506	0.326091	0.251034	0.18916	0.279539
	162.584	4.65501	6.08161	7.09814	5.86249	6.87035			1.42216	2.07165	3.1003	1.36361	3.0581			0.339424	0.297878	0.389802	0.211624	0.244849		162.584	1.58519	1.44559	1.60381	1.47861	1.58176			0.511309	0.997255	1.62717	0.563837	1.5801			0.193149	0.311378	0.10941	0.189467	0.280201
	164.21	4.79175	5.99557	7.04485	5.85993	6.86413			1.41519	2.09074	3.21347	1.36814	3.05506			0.203684	0.332821	0.468421	0.212848	0.245494		164.21	1.58855	1.47082	1.64679	1.4779	1.58098			0.489437	0.855856	1.5096	0.5657	1.57876			0.227922	0.20432	0.283264	0.189774	0.280861
	165.852	4.8212	5.96985	6.97736	5.85744	6.858			1.32408	2.11353	3.1798	1.37266	3.05203			0.101052	0.308311	0.477426	0.214074	0.246137		165.852	1.41715	1.52071	1.56387	1.47721	1.58021			0.564175	0.849091	1.61637	0.567563	1.57744			0.247208	0.240021	0.262375	0.190081	0.281518
	167.51	4.74011	5.88905	6.98988	5.85503	6.85197			1.37018	2.17509	3.07692	1.37715	3.04902			0.136902	0.174582	0.459175	0.215304	0.246778		167.51	1.45946	1.50203	1.61647	1.47653	1.57947			0.618373	0.730714	1.60178	0.569426	1.57615			0.270059	0.235739	0.177854	0.190389	0.282173
	169.185	4.85392	5.96647	6.99377	5.85269	6.84604			1.38977	2.13822	3.13597	1.38163	3.04602			0.146708	0.184194	0.430379	0.216536	0.247417		169.185	1.482	1.51531	1.72798	1.47588	1.57876			0.594617	0.76219	1.56257	0.571289	1.57488			0.290035	0.257734	0.448787	0.190696	0.282826
	170.877	4.85781	6.06637	7.02407	5.85042	6.84021			1.36896	2.18284	3.0359	1.38609	3.04305			0.113117	0.238087	0.415129	0.217771	0.248054		170.877	1.59359	1.55344	1.70991	1.47525	1.57806			0.567631	0.739974	1.64197	0.573152	1.57363			0.264394	0.217051	0.247552	0.191004	0.283476
	172.586	4.77431	6.03041	7.08273	5.84822	6.83448			1.39107	2.16769	3.02563	1.39053	3.04008			0.19969	0.241801	0.400956	0.219009	0.248688		172.586	1.63111	1.50719	1.63957	1.47464	1.57739			0.576665	0.882492	1.65636	0.575015	1.57241			0.215937	0.318256	0.147812	0.191311	0.284124
	174.312	4.71913	6.01831	7.08622	5.84608	6.82885			1.47082	2.1823	3.12029	1.39495	3.03714			0.23051	0.242873	0.488352	0.220249	0.24932		174.312	1.52202	1.54995	1.54707	1.47404	1.57674			0.530811	0.925606	1.70456	0.576877	1.57121			0.122689	0.230496	0.190223	0.191619	0.284769
	176.055	4.82203	5.96894	7.12475	5.84402	6.82331			1.36659	2.14459	3.01293	1.39935	3.03421			0.185763	0.234544	0.484012	0.221492	0.24995		176.055	1.4428	1.64744	1.71329	1.47347	1.57611			0.495703	0.938846	1.63396	0.578738	1.57003			0.231561	0.234515	0.242398	0.191926	0.285411
	177.815	4.95024	5.94361	7.0238	5.84202	6.81788			1.45562	1.99002	3.00909	1.40373	3.03131			0.267579	0.233719	0.395165	0.222737	0.250577		177.815	1.44	1.53215	1.69381	1.47291	1.5755			0.628058	0.85905	1.58857	0.580599	1.56888			0.196328	0.319488	0.248979	0.192233	0.28605
	179.594	4.80703	6.05348	7.06313	5.84008	6.81254			1.47926	2.07753	3.08347	1.40808	3.02841			0.183967	0.190945	0.474456	0.223984	0.251201		179.594	1.48337	1.46566	1.70458	1.47237	1.57492			0.615966	0.858756	1.50353	0.582458	1.56775			0.149938	0.337608	0.286926	0.192541	0.286687
	181.39	4.73871	6.02299	6.96208	5.83821	6.8073			1.39561	2.14075	3.07131	1.41242	3.02554			0.119831	0.238523	0.43073	0.225233	0.251823		181.39	1.48334	1.51307	1.79969	1.47185	1.57435			0.512501	0.811311	1.5601	0.584316	1.56664			0.226771	0.292233	0.331188	0.192848	0.28732
	183.203	4.73462	6.04718	7.09869	5.8364	6.80216			1.37113	2.16297	3.07419	1.41673	3.02269			0.184834	0.286391	0.480043	0.226485	0.252442		183.203	1.45047	1.55971	1.75495	1.47135	1.5738			0.546331	0.846094	1.66176	0.586173	1.56556			0.177356	0.382722	0.359785	0.193155	0.287951
	185.036	4.77925	6.09129	7.13298	5.83465	6.79712			1.44186	2.15141	3.0753	1.42102	3.01986			0.114923	0.210082	0.335296	0.227738	0.253059		185.036	1.47056	1.51347	1.77695	1.47086	1.57327			0.509801	0.887676	1.68248	0.588028	1.5645			0.169162	0.352236	0.236161	0.193461	0.288578
	186.886	4.81324	6.05368	6.93096	5.83296	6.79217			1.51858	2.13266	3.08737	1.42529	3.01704			0.198004	0.192841	0.489299	0.228994	0.253672		186.886	1.48629	1.53172	1.68314	1.47039	1.57276			0.582726	0.974741	1.60055	0.589881	1.56346			0.0552139	0.189969	0.182801	0.193768	0.289202
	188.755	4.753	5.93678	6.97121	5.83133	6.78732			1.49434	2.24316	3.09316	1.42953	3.01425			0.281016	0.272403	0.438203	0.230251	0.254282		188.755	1.52123	1.45788	1.72342	1.46993	1.57227			0.537808	0.921381	1.63627	0.591732	1.56244			0.145347	0.269989	0.212363	0.194074	0.289822
	190.642	4.74553	5.98193	7.01163	5.82975	6.78257			1.45205	2.27851	3.06268	1.43375	3.01148			0.280863	0.34038	0.399072	0.23151	0.25489		190.642	1.45491	1.51949	1.67141	1.46949	1.5718			0.463761	0.980879	1.55734	0.593581	1.56145			0.174337	0.263167	0.433546	0.19438	0.29044
	192.549	4.81551	6.0241	7.06198	5.82823	6.77791			1.39141	2.20735	3.0188	1.43794	3.00872			0.145022	0.272679	0.351508	0.23277	0.255494		192.549	1.37007	1.51014	1.55955	1.46907	1.57134			0.548538	0.957458	1.61667	0.595427	1.56047			0.188149	0.298022	0.353449	0.194685	0.291054
	194.474	4.77455	5.99962	7.07405	5.82676	6.77335			1.5282	2.13792	3.15211	1.44211	3.00599			0.294338	0.346965	0.369517	0.234032	0.256095		194.474	1.51766	1.5885	1.8006	1.46866	1.5709			0.672762	0.865729	1.46574	0.59727	1.55952			0.237239	0.383875	0.298736	0.19499	0.291664
	196.419	4.69862	6.03932	6.97465	5.82535	6.76888			1.47568	2.10643	3.09743	1.44625	3.00328			0.217077	0.263136	0.462656	0.235295	0.256693		196.419	1.54882	1.51073	1.78748	1.46826	1.57048			0.57934	0.857545	1.60381	0.599111	1.55859			0.170577	0.23609	0.476587	0.195295	0.292271
	198.383	4.79191	5.98295	6.8347	5.82399	6.76451			1.4984	2.23817	3.03149	1.45036	3.00059			0.267957	0.262107	0.38274	0.23656	0.257287		198.383	1.50926	1.4894	1.73338	1.46788	1.57008			0.745889	0.780394	1.64959	0.600948	1.55768			0.109553	0.252521	0.392762	0.195599	0.292874
	200.367	4.75542	5.90525	6.88099	5.82268	6.76022			1.4155	2.2278	3.0839	1.45445	2.99793			0.197232	0.245451	0.487799	0.237825	0.257878		200.367	1.52175	1.48739	1.73449	1.46752	1.56968			0.62603	0.877647	1.54219	0.602782	1.5568			0.0903802	0.249818	0.186996	0.195903	0.293473
	202.371	4.73047	5.88362	6.89002	5.82142	6.75604			1.36236	2.20821	3.02448	1.45851	2.99528			0.26659	0.148523	0.475193	0.239092	0.258466		202.371	1.55624	1.4205	1.58915	1.46716	1.56931			0.618125	0.785095	1.5478	0.604613	1.55593			0.161041	0.256631	0.138739	0.196206	0.294069
	204.394	4.67099	5.88201	6.84217	5.82021	6.75194			1.43949	2.17145	3.05581	1.46254	2.99266			0.257666	0.292765	0.438696	0.240359	0.25905		204.394	1.45986	1.49749	1.52777	1.46682	1.56895			0.659562	0.850858	1.51181	0.606439	1.55509			0.191247	0.296796	0.211069	0.196509	0.29466
	206.438	4.75408	5.82488	6.95605	5.81904	6.74793			1.39954	2.0638	3.12144	1.46654	2.99006			0.271515	0.285789	0.330911	0.241627	0.25963		206.438	1.50792	1.43016	1.72266	1.4665	1.5686			0.644816	0.843891	1.48759	0.608262	1.55426			0.130939	0.275864	0.380417	0.196811	0.295248
	208.503	4.75896	6.03643	7.04196	5.81792	6.74402			1.41737	2.06542	3.16015	1.47052	2.98748			0.181303	0.292187	0.399163	0.242896	0.260206		208.503	1.5395	1.51009	1.61532	1.46618	1.56827			0.670619	0.843838	1.49219	0.610081	1.55346			0.187169	0.401707	0.322919	0.197113	0.295831
	210.588	4.70179	5.97564	7.04822	5.81684	6.74019			1.41096	2.08276	3.1106	1.47446	2.98493			0.215612	0.198583	0.374164	0.244165	0.260779		210.588	1.53162	1.42873	1.63899	1.46588	1.56795			0.664874	0.860259	1.59503	0.611895	1.55268			0.264411	0.331047	0.290711	0.197414	0.296411
	212.694	4.90603	5.89215	6.90006	5.81581	6.73645			1.45755	2.15081	3.09952	1.47838	2.9824			0.243902	0.18684	0.394373	0.245435	0.261348		212.694	1.42505	1.45715	1.63467	1.46559	1.56765			0.572095	0.906019	1.69667	0.613705	1.55191			0.158867	0.27005	0.280402	0.197714	0.296986
	214.82	4.79329	5.8465	7.07529	5.81481	6.7328			1.5363	2.14166	3.03548	1.48226	2.9799			0.280617	0.27054	0.41907	0.246705	0.261913		214.82	1.50668	1.58841	1.67097	1.46531	1.56735			0.570734	0.836048	1.5928	0.61551	1.55117			0.180436	0.282588	0.341146	0.198014	0.297557
	216.969	4.68379	5.83731	6.96254	5.81386	6.72924			1.44972	2.07945	2.94344	1.48611	2.97742			0.192051	0.228918	0.466029	0.247975	0.262474		216.969	1.52272	1.46309	1.60011	1.46505	1.56707			0.665309	0.840284	1.54144	0.61731	1.55044			0.312769	0.25873	0.36407	0.198312	0.298124
	219.138	4.84485	5.88414	6.91164	5.81295	6.72576			1.50983	2.09887	3.08078	1.48994	2.97496			0.264712	0.224034	0.393115	0.249245	0.263031		219.138	1.54344	1.49921	1.8055	1.46479	1.56681			0.640125	0.963052	1.50081	0.619104	1.54974			0.136068	0.242679	0.38461	0.19861	0.298686
	221.33	4.75828	5.9594	6.96559	5.81208	6.72237			1.47713	2.14721	3.04171	1.49373	2.97253			0.333379	0.326077	0.48329	0.250515	0.263584		221.33	1.43696	1.50604	1.57985	1.46455	1.56655			0.674996	0.935042	1.61211	0.620893	1.54905			0.218505	0.325965	0.276621	0.198907	0.299244
	223.543	4.80908	6.01824	6.91145	5.81124	6.71906			1.53961	2.10883	3.00209	1.49748	2.97012			0.296294	0.267268	0.452494	0.251785	0.264133		223.543	1.44808	1.46169	1.57902	1.46431	1.56631			0.639771	0.819746	1.56878	0.622677	1.54838			0.135135	0.395788	0.277863	0.199204	0.299798
	225.778	4.7243	5.81955	6.80382	5.81044	6.71584			1.48099	2.17154	3.0411	1.50121	2.96774			0.255515	0.159933	0.412174	0.253055	0.264678		225.778	1.51952	1.43852	1.50521	1.46409	1.56607			0.626093	0.889622	1.44437	0.624454	1.54773			0.191114	0.296002	0.0846472	0.199499	0.300346
	228.036	4.68845	6.01783	6.82268	5.80967	6.7127			1.54887	2.16835	3.04425	1.5049	2.96538			0.238133	0.260314	0.449805	0.254324	0.265218		228.036	1.51614	1.56936	1.66979	1.46387	1.56585			0.589735	0.963707	1.61057	0.626226	1.5471			0.132318	0.248185	0.313635	0.199794	0.300891
	230.317	4.68121	5.88164	6.87611	5.80894	6.70964			1.56649	2.14525	3.03865	1.50856	2.96305			0.259167	0.325599	0.350203	0.255592	0.265754		230.317	1.5099	1.52356	1.44112	1.46366	1.56563			0.582726	0.783459	1.63364	0.627991	1.54649			0.353572	0.332861	0.211067	0.200087	0.30143
	232.62	4.78692	6.00079	6.92132	5.80824	6.70666			1.46176	2.10882	2.94292	1.51219	2.96075			0.196794	0.251859	0.437255	0.25686	0.266285		232.62	1.36451	1.52653	1.61137	1.46347	1.56543			0.576044	0.931942	1.59919	0.62975	1.54589			0.201817	0.365574	0.342961	0.20038	0.301965
	234.946	4.69282	5.91663	6.81661	5.80757	6.70376			1.46105	2.1221	2.97542	1.51578	2.95847			0.325276	0.262242	0.466486	0.258127	0.266812		234.946	1.48602	1.42573	1.50383	1.46328	1.56524			0.60076	0.903409	1.48961	0.631502	1.54532			0.367482	0.249143	0.217147	0.200671	0.302495
	237.295	4.7705	5.92281	6.78993	5.80693	6.70093			1.60107	2.12717	3.06392	1.51933	2.95621			0.327294	0.278435	0.485017	0.259393	0.267334		237.295	1.51496	1.52948	1.61245	1.4631	1.56505			0.627704	0.7963	1.54259	0.633247	1.54475			0.178758	0.360287	0.220549	0.200961	0.30302
	239.668	4.72528	5.82309	6.76055	5.80632	6.69819			1.50976	2.18733	3.0336	1.52286	2.95399			0.303442	0.246407	0.373644	0.260657	0.267852		239.668	1.57864	1.61292	1.53653	1.46293	1.56488			0.56655	0.87648	1.65072	0.634984	1.54421			0.247415	0.283903	0.175528	0.201251	0.30354
	242.065	4.76191	5.90983	6.81638	5.80574	6.69552			1.47746	2.02244	2.99595	1.52634	2.95179			0.196198	0.325416	0.499986	0.261921	0.268365		242.065	1.62586	1.55735	1.71554	1.46276	1.56471			0.57496	0.868522	1.5522	0.636715	1.54368			0.222001	0.140299	0.450719	0.201539	0.304055
	244.486	4.67855	5.91034	6.77664	5.80519	6.69293			1.37436	2.17983	2.95289	1.52979	2.94961			0.194523	0.227978	0.37938	0.263183	0.268874		244.486	1.61122	1.51691	1.61134	1.46261	1.56455			0.581561	0.930661	1.4394	0.638437	1.54317			0.32969	0.265259	0.270937	0.201826	0.304565
	246.931	4.7803	5.88589	6.7237	5.80466	6.69041			1.45439	2.16442	3.01697	1.53321	2.94747			0.23289	0.185796	0.436099	0.264443	0.269377		246.931	1.42848	1.38553	1.67261	1.46246	1.5644			0.646275	0.869259	1.55217	0.640152	1.54267			0.236876	0.435686	0.368767	0.202111	0.30507
	249.4	4.73275	5.88405	6.79423	5.80416	6.68796			1.46888	2.14701	3.02097	1.53659	2.94535			0.240325	0.279578	0.391626	0.265702	0.269876		249.4	1.49716	1.43377	1.69499	1.46232	1.56426			0.680733	0.854859	1.55567	0.641859	1.54219			0.218407	0.34741	0.450817	0.202396	0.30557
	251.894	4.66127	5.79043	6.77243	5.80368	6.68558			1.47456	2.24126	3.01061	1.53993	2.94325			0.23667	0.295999	0.457849	0.266959	0.27037		251.894	1.55597	1.34581	1.66065	1.46218	1.56412			0.617451	0.88362	1.67986	0.643558	1.54173			0.326045	0.209023	0.269302	0.202679	0.306065
	254.413	4.85689	5.83888	6.75269	5.80323	6.68327			1.57105	2.20172	2.9472	1.54323	2.94119			0.247806	0.324984	0.390409	0.268214	0.270859		254.413	1.59868	1.43713	1.57878	1.46206	1.56399			0.602248	0.789923	1.50982	0.645248	1.54128			0.145428	0.250753	0.248407	0.202961	0.306554
	256.957	4.84208	5.90115	6.92349	5.8028	6.68104			1.51974	2.17762	2.99695	1.5465	2.93915			0.222619	0.228852	0.375414	0.269467	0.271343		256.957	1.46144	1.42917	1.52892	1.46193	1.56387			0.648827	0.77509	1.57541	0.64693	1.54084			0.1732	0.375317	0.442825	0.203241	0.307039
	259.527	4.75976	5.97877	6.85868	5.80239	6.67887			1.52203	2.12252	3.05119	1.54973	2.93714			0.220915	0.263162	0.360641	0.270717	0.271822		259.527	1.5243	1.51455	1.61361	1.46182	1.56375			0.505075	0.9645	1.51452	0.648602	1.54042			0.132851	0.465302	0.229851	0.203521	0.307518
	262.122	4.64413	5.89908	6.74866	5.802	6.67677			1.53678	2.11781	3.00269	1.55293	2.93516			0.322842	0.233699	0.326652	0.271966	0.272296		262.122	1.48207	1.50275	1.64386	1.46171	1.56364			0.586075	0.83706	1.50285	0.650266	1.54001			0.173453	0.286209	0.0822396	0.203798	0.307991
	264.743	4.69834	5.80141	6.78302	5.80163	6.67473			1.54159	2.00871	3.11505	1.55608	2.9332			0.29045	0.221703	0.404593	0.273211	0.272765		264.743	1.5376	1.47624	1.62224	1.4616	1.56354			0.648951	0.864183	1.62768	0.65192	1.53962			0.316917	0.277615	0.255894	0.204074	0.308459
	267.39	4.78363	5.89075	6.79334	5.80128	6.67275			1.5792	2.09599	2.9854	1.5592	2.93127			0.327175	0.35378	0.396738	0.274454	0.273229		267.39	1.51501	1.43511	1.64129	1.46151	1.56344			0.542384	0.810704	1.68745	0.653565	1.53924			0.269557	0.285495	0.133056	0.204349	0.308922
	270.064	4.93369	5.90176	6.85712	5.80095	6.67085			1.5372	2.09277	2.96135	1.56228	2.92937			0.247631	0.197825	0.351373	0.275695	0.273688		270.064	1.55191	1.50128	1.61636	1.46141	1.56335			0.598829	0.768835	1.64683	0.6552	1.53887			0.165681	0.328391	0.273578	0.204622	0.309379
	272.765	4.70468	5.70103	6.82948	5.80064	6.669			1.592	2.13216	3.08649	1.56532	2.9275			0.22941	0.259413	0.450357	0.276932	0.274141		272.765	1.61701	1.33065	1.62381	1.46132	1.56326			0.631061	0.804804	1.59123	0.656826	1.53852			0.223616	0.355135	0.176528	0.204894	0.309831
	275.493	4.71796	5.83001	6.89313	5.80034	6.66721			1.63769	2.07249	2.97844	1.56832	2.92566			0.401436	0.253441	0.368552	0.278166	0.274589		275.493	1.52486	1.37483	1.58934	1.46124	1.56317			0.589288	0.755201	1.47711	0.658441	1.53818			0.208624	0.345144	0.272926	0.205164	0.310278
	278.248	4.67611	5.74112	6.75302	5.80006	6.66548			1.6032	2.08806	2.95116	1.57128	2.92384			0.217363	0.165095	0.426797	0.279397	0.275032		278.248	1.52314	1.50646	1.69531	1.46116	1.5631			0.631019	0.918106	1.57095	0.660046	1.53785			0.0903977	0.351846	0.249148	0.205433	0.310718
	281.03	4.63579	5.85216	6.77827	5.7998	6.66381			1.60173	2.04303	3.08683	1.57421	2.92205			0.221653	0.283874	0.4505	0.280624	0.275469		281.03	1.47842	1.51808	1.41907	1.46109	1.56302			0.530292	0.924537	1.63759	0.66164	1.53753			0.121977	0.349545	0.0916356	0.205699	0.311153
	283.84	4.68331	5.85586	6.64596	5.79955	6.6622			1.5834	2.22138	2.98161	1.57709	2.92029			0.24825	0.364843	0.428636	0.281848	0.275901		283.84	1.48438	1.48155	1.58503	1.46101	1.56295			0.642011	0.92626	1.71067	0.663224	1.53722			0.222711	0.386673	0.381457	0.205964	0.311583
	286.679	4.64018	5.91844	6.62562	5.79931	6.66064			1.56362	2.18818	2.97838	1.57994	2.91856			0.333948	0.22773	0.352395	0.283068	0.276328		286.679	1.5447	1.49181	1.50567	1.46095	1.56289			0.589391	0.827493	1.57407	0.664797	1.53693			0.144949	0.411924	0.351759	0.206228	0.312007
	289.546	4.83225	5.83026	6.65756	5.79909	6.65914			1.53559	2.15745	2.89886	1.58274	2.91685			0.294583	0.155617	0.475293	0.284284	0.27675		289.546	1.55882	1.41948	1.5637	1.46088	1.56283			0.601364	0.795392	1.51086	0.666359	1.53665			0.256353	0.376112	0.355621	0.206489	0.312425
	292.441	4.88549	5.81155	6.7243	5.79888	6.65769			1.52888	2.03066	3.0475	1.58551	2.91518			0.191854	0.285351	0.438162	0.285497	0.277166		292.441	1.39966	1.47719	1.41547	1.46083	1.56277			0.669282	0.746588	1.57539	0.667909	1.53638			0.125543	0.463131	0.204554	0.206749	0.312838
	295.365	4.7667	5.79494	6.60707	5.79869	6.65629			1.57812	2.15736	2.96495	1.58823	2.91353			0.306252	0.327966	0.389219	0.286705	0.277576		295.365	1.49652	1.41925	1.54662	1.46077	1.56271			0.664451	0.823548	1.59714	0.669449	1.53612			0.252323	0.322235	0.421302	0.207007	0.313244
	298.319	4.75738	5.76419	6.69259	5.7985	6.65494			1.54432	2.07252	3.03405	1.59092	2.91191			0.214678	0.228162	0.376611	0.287909	0.277981		298.319	1.48547	1.36189	1.53415	1.46072	1.56266			0.627212	0.90698	1.4953	0.670976	1.53586			0.209993	0.289843	0.414476	0.207263	0.313646
	301.302	4.79143	5.83054	6.7654	5.79833	6.65364			1.51249	2.12832	3.01903	1.59357	2.91031			0.285706	0.287423	0.426588	0.289108	0.27838		301.302	1.47664	1.4404	1.43935	1.46067	1.56262			0.587011	0.810565	1.64592	0.672492	1.53562			0.139637	0.386603	0.289885	0.207518	0.314041
	304.315	4.81819	5.92128	6.73754	5.79816	6.65239			1.51974	2.24807	2.88104	1.59617	2.90875			0.225999	0.260762	0.38607	0.290303	0.278774		304.315	1.51944	1.4592	1.85359	1.46062	1.56257			0.554102	0.710294	1.58755	0.673996	1.53539			0.118418	0.413152	0.457938	0.20777	0.314431
	307.358	4.73566	5.77166	6.73352	5.79801	6.65119			1.65169	2.14895	2.96209	1.59874	2.90721			0.348614	0.28757	0.372154	0.291493	0.279163		307.358	1.53665	1.49265	1.44539	1.46058	1.56253			0.696638	0.782834	1.57914	0.675488	1.53517			0.220873	0.292938	0.20152	0.20802	0.314814
	310.432	4.78092	5.75465	6.76272	5.79787	6.65003			1.58683	2.01651	2.93307	1.60127	2.9057			0.252219	0.269834	0.414123	0.292678	0.279546		310.432	1.52254	1.38582	1.37729	1.46054	1.56249			0.68693	0.958058	1.45021	0.676967	1.53496			0.208322	0.357005	0.363315	0.208269	0.315192
	313.536	4.67455	5.80718	6.80703	5.79773	6.64892			1.5786	2.08992	2.95582	1.60375	2.90422			0.280943	0.312099	0.416191	0.293859	0.279923		313.536	1.51083	1.40119	1.55593	1.4605	1.56245			0.609566	0.764369	1.49192	0.678434	1.53475			0.307201	0.329255	0.277753	0.208515	0.315565
	316.672	4.74366	5.85044	6.72405	5.7976	6.64785			1.60271	2.04403	3.01303	1.6062	2.90276			0.342346	0.207882	0.385104	0.295034	0.280295		316.672	1.49365	1.47928	1.63138	1.46046	1.56242			0.577402	0.846364	1.57891	0.679889	1.53456			0.104158	0.36544	0.370131	0.20876	0.315931
	319.838	4.77057	5.82015	6.67089	5.79749	6.64683			1.63613	2.06771	3.01726	1.60861	2.90133			0.275416	0.242422	0.353585	0.296204	0.280661		319.838	1.48827	1.47246	1.40252	1.46043	1.56239			0.650378	0.976046	1.53183	0.68133	1.53437			0.224978	0.314765	0.333988	0.209002	0.316292
	323.037	4.62117	5.87102	6.69025	5.79738	6.64584			1.62127	2.11641	2.92907	1.61097	2.89993			0.315436	0.373799	0.384062	0.297368	0.281021		323.037	1.47149	1.48777	1.48752	1.4604	1.56236			0.63479	0.802882	1.64903	0.682759	1.53419			0.12903	0.242352	0.260571	0.209242	0.316647
	326.267	4.75852	5.73639	6.61647	5.79727	6.64489			1.64598	2.10879	2.95802	1.6133	2.89856			0.334973	0.287496	0.232954	0.298527	0.281376		326.267	1.47939	1.479	1.59101	1.46037	1.56233			0.612589	0.881929	1.57761	0.684174	1.53402			0.151882	0.22137	0.372719	0.209481	0.316996
	329.53	4.65024	5.80746	6.78137	5.79718	6.64399			1.62112	1.97369	3.05968	1.61559	2.89721			0.371193	0.296642	0.401544	0.29968	0.281726		329.53	1.39508	1.42099	1.47521	1.46034	1.5623			0.617648	0.936671	1.72356	0.685577	1.53386			0.189565	0.24542	0.488002	0.209717	0.31734
	332.825	4.95678	5.77396	6.68265	5.79709	6.64312			1.60238	2.10844	3.02299	1.61783	2.8959			0.247628	0.321801	0.426161	0.300827	0.282069		332.825	1.53264	1.35444	1.51467	1.46031	1.56228			0.707941	0.889532	1.53731	0.686966	1.5337			0.210345	0.286999	0.446113	0.209951	0.317677
	336.153	4.58317	5.61427	6.523	5.797	6.64228			1.72767	2.16302	2.92734	1.62004	2.8946			0.316743	0.244662	0.449674	0.301968	0.282407		336.153	1.5303	1.40953	1.49452	1.46029	1.56226			0.677356	0.919153	1.49202	0.688341	1.53355			0.257238	0.217406	0.372568	0.210182	0.318009
	339.515	4.70346	5.73642	6.63428	5.79692	6.64149			1.6674	2.11452	2.92208	1.62221	2.89334			0.282558	0.2642	0.364267	0.303103	0.28274		339.515	1.47335	1.42059	1.48593	1.46027	1.56224			0.689474	1.00171	1.35698	0.689703	1.53341			0.180343	0.219807	0.475711	0.210412	0.318335
	342.91	4.77581	5.90106	6.69797	5.79685	6.64072			1.59517	2.15046	2.919	1.62434	2.8921			0.295224	0.269882	0.338372	0.304231	0.283067		342.91	1.47197	1.44985	1.63701	1.46025	1.56222			0.74304	0.781315	1.49723	0.691051	1.53328			0.133612	0.305562	0.111735	0.210639	0.318656
	346.339	4.6814	5.88054	6.74902	5.79678	6.63999			1.55692	2.0874	2.96974	1.62643	2.89089			0.248762	0.224195	0.427399	0.305353	0.283388		346.339	1.46115	1.46858	1.61503	1.46023	1.5622			0.606377	0.958049	1.40625	0.692385	1.53315			0.163455	0.278281	0.201127	0.210864	0.318971
	349.803	4.80136	5.73114	6.63912	5.79672	6.63929			1.61552	2.20273	2.99686	1.62848	2.8897			0.405762	0.302891	0.388835	0.306469	0.283704		349.803	1.36835	1.45777	1.74954	1.46021	1.56218			0.759555	0.864463	1.39699	0.693705	1.53302			0.210704	0.409897	0.257038	0.211087	0.319279
	353.301	4.70638	5.9178	6.59912	5.79666	6.63863			1.72143	2.11648	2.94596	1.63049	2.88854			0.390247	0.317669	0.472168	0.307578	0.284014		353.301	1.55144	1.46592	1.78301	1.46019	1.56217			0.59565	0.915041	1.55385	0.695011	1.53291			0.217721	0.432963	0.437189	0.211307	0.319583
	356.834	4.6621	5.8257	6.66416	5.79661	6.63799			1.65271	2.1547	2.93374	1.63246	2.8874			0.289267	0.300107	0.420196	0.30868	0.284319		356.834	1.45617	1.46518	1.59956	1.46018	1.56215			0.669462	0.854434	1.48852	0.696302	1.5328			0.328603	0.2616	0.262642	0.211526	0.31988
	360.402	4.58191	5.78798	6.68828	5.79656	6.63738			1.6562	2.15273	2.93756	1.63439	2.88629			0.28327	0.278472	0.348708	0.309774	0.284618		360.402	1.52801	1.50352	1.49973	1.46016	1.56214			0.641895	0.90504	1.56207	0.697579	1.53269			0.215243	0.340007	0.220645	0.211741	0.320172
	364.006	4.63172	5.78324	6.61801	5.79651	6.6368			1.7095	2.01367	2.91646	1.63629	2.88521			0.306527	0.321482	0.313354	0.310862	0.284912		364.006	1.54295	1.42725	1.65148	1.46015	1.56213			0.647845	0.711038	1.52185	0.698842	1.53259			0.327821	0.40044	0.32212	0.211955	0.320459
	367.646	4.72448	5.75051	6.55051	5.79647	6.63625			1.67578	2.14834	2.88502	1.63814	2.88415			0.277197	0.288855	0.268659	0.311943	0.2852		367.646	1.39912	1.42658	1.38435	1.46014	1.56212			0.680315	0.8289	1.44274	0.70009	1.53249			0.172	0.374272	0.352409	0.212166	0.320739
	371.322	4.68771	5.75797	6.74153	5.79643	6.63572			1.65303	2.0581	2.88009	1.63996	2.88311			0.290888	0.21737	0.390803	0.313016	0.285483		371.322	1.57649	1.47092	1.52366	1.46012	1.56211			0.646749	0.9522	1.48345	0.701323	1.5324			0.286586	0.279341	0.345774	0.212375	0.321014
	375.036	4.84325	5.72936	6.67863	5.79639	6.63522			1.68542	1.96191	2.90791	1.64174	2.8821			0.333233	0.251672	0.369919	0.314082	0.28576		375.036	1.45183	1.45941	1.39984	1.46011	1.5621			0.638009	0.776756	1.65531	0.702542	1.53232			0.302756	0.34434	0.412571	0.212581	0.321284
	378.786	4.62273	5.68628	6.61701	5.79636	6.63474			1.5636	2.12229	2.99939	1.64348	2.88112			0.33262	0.301329	0.416179	0.31514	0.286032		378.786	1.50853	1.51286	1.53441	1.4601	1.56209			0.731137	0.818483	1.38662	0.703746	1.53224			0.139015	0.350236	0.422193	0.212785	0.321548
	382.574	4.68089	5.72579	6.59106	5.79633	6.63429			1.62738	2.07958	2.97513	1.64519	2.88015			0.272636	0.287749	0.3768	0.31619	0.286298		382.574	1.46423	1.46827	1.43093	1.46009	1.56208			0.556641	1.02597	1.62191	0.704934	1.53216			0.204209	0.351282	0.335791	0.212986	0.321807
	386.4	4.60434	5.77684	6.67933	5.7963	6.63386			1.52091	2.17035	2.86777	1.64686	2.87922			0.23879	0.307985	0.414413	0.317232	0.286559		386.4	1.50275	1.44119	1.52443	1.46009	1.56207			0.657145	0.791175	1.45327	0.706108	1.53209			0.361722	0.248475	0.305956	0.213185	0.32206
	390.264	4.67257	5.8212	6.67199	5.79627	6.63345			1.55326	2.10352	2.94715	1.64849	2.8783			0.305145	0.304555	0.569255	0.318267	0.286815		390.264	1.52874	1.40834	1.55638	1.46008	1.56207			0.728971	0.93169	1.41734	0.707266	1.53202			0.159343	0.358937	0.456517	0.213382	0.322308
	394.166	4.65106	5.7883	6.69448	5.79625	6.63306			1.58247	2.14388	2.89546	1.65008	2.87741			0.273184	0.322832	0.386848	0.319293	0.287066		394.166	1.45056	1.42424	1.45405	1.46007	1.56206			0.576081	0.833611	1.49584	0.70841	1.53195			0.12802	0.269603	0.26061	0.213576	0.32255
	398.108	4.67435	5.81376	6.52233	5.79622	6.63269			1.63712	2.11029	2.86553	1.65164	2.87654			0.364158	0.279289	0.403931	0.320311	0.287311		398.108	1.49521	1.47419	1.39652	1.46007	1.56205			0.684458	0.929298	1.58391	0.709538	1.53189			0.135232	0.199691	0.319668	0.213767	0.322787
	402.089	4.64279	5.71777	6.55346	5.7962	6.63234			1.63338	2.15799	2.91628	1.65316	2.8757			0.219219	0.23968	0.386796	0.32132	0.287551		402.089	1.5465	1.34536	1.46795	1.46006	1.56205			0.762309	0.810111	1.49235	0.710651	1.53183			0.124168	0.255838	0.370392	0.213956	0.323019
	406.11	4.60728	5.80647	6.72764	5.79618	6.63201			1.59713	2.03125	2.93996	1.65465	2.87487			0.270274	0.281439	0.429401	0.322322	0.287785		406.11	1.4823	1.5541	1.61209	1.46005	1.56204			0.647399	0.865995	1.54299	0.711748	1.53178			0.186192	0.347617	0.357068	0.214143	0.323245
	410.171	4.49741	5.71907	6.61455	5.79617	6.6317			1.62543	2.20053	2.91024	1.6561	2.87407			0.415313	0.363099	0.413837	0.323314	0.288015		410.171	1.5128	1.50908	1.56974	1.46005	1.56204			0.673761	0.803763	1.5978	0.71283	1.53172			0.203096	0.30211	0.300023	0.214327	0.323467
	414.273	4.80899	5.77157	6.67199	5.79615	6.6314			1.62328	2.15754	2.89008	1.65752	2.87329			0.346984	0.316611	0.530769	0.324298	0.288239		414.273	1.55137	1.37987	1.38914	1.46004	1.56204			0.68805	0.846364	1.57562	0.713897	1.53167			0.135663	0.195386	0.334066	0.214508	0.323683
	418.415	4.50252	5.67037	6.51814	5.79614	6.63112			1.68115	2.11434	2.86696	1.6589	2.87253			0.281746	0.31621	0.430295	0.325273	0.288459		418.415	1.44012	1.46776	1.3805	1.46004	1.56203			0.542084	0.877664	1.67663	0.714948	1.53163			0.200252	0.223873	0.373691	0.214687	0.323894
	422.6	4.62882	5.73199	6.61226	5.79612	6.63085			1.73437	2.08291	2.92883	1.66025	2.8718			0.41931	0.37029	0.459509	0.326239	0.288673		422.6	1.54187	1.29507	1.48961	1.46004	1.56203			0.575699	0.961668	1.42772	0.715983	1.53159			0.231711	0.446807	0.260037	0.214863	0.3241
	426.826	4.63063	5.77048	6.60127	5.79611	6.6306			1.6934	2.15313	2.9684	1.66157	2.87108			0.312867	0.268709	0.412941	0.327196	0.288882		426.826	1.46216	1.51507	1.49512	1.46003	1.56203			0.615277	1.00321	1.48161	0.717004	1.53155			0.378864	0.362128	0.319045	0.215037	0.324301
	431.094	4.75512	5.76545	6.584	5.7961	6.63036			1.65752	2.094	2.83758	1.66285	2.87038			0.287017	0.363896	0.376754	0.328144	0.289087		431.094	1.43672	1.41694	1.4887	1.46003	1.56202			0.64047	0.922186	1.49926	0.718008	1.53151			0.23804	0.411524	0.329274	0.215208	0.324497
	435.405	4.6077	5.79584	6.53636	5.79609	6.63014			1.63638	2.18458	2.92329	1.6641	2.86971			0.303221	0.27982	0.360435	0.329083	0.289286		435.405	1.5229	1.42321	1.56561	1.46003	1.56202			0.700368	1.01657	1.50707	0.718997	1.53147			0.331473	0.412265	0.138958	0.215377	0.324688
	439.759	4.76423	5.79699	6.56195	5.79608	6.62993			1.70786	2.14661	2.89507	1.66531	2.86905			0.443033	0.264523	0.26761	0.330012	0.289481		439.759	1.60274	1.49463	1.3954	1.46002	1.56202			0.649596	0.920982	1.52354	0.71997	1.53144			0.188895	0.3828	0.193931	0.215543	0.324875
	444.156	4.68617	5.79777	6.49145	5.79607	6.62973			1.65257	2.13682	2.98156	1.6665	2.86842			0.337149	0.395031	0.315074	0.330932	0.289671		444.156	1.57674	1.47251	1.50719	1.46002	1.56202			0.732334	0.967102	1.47582	0.720928	1.53141			0.231752	0.3846	0.299543	0.215707	0.325056
	448.598	4.59912	5.72039	6.6049	5.79607	6.62954			1.64059	2.14145	2.84693	1.66765	2.8678			0.307275	0.255033	0.384808	0.331843	0.289856		448.598	1.66301	1.46824	1.71567	1.46002	1.56202			0.657753	0.877618	1.63669	0.721871	1.53138			0.218273	0.371225	0.2326	0.215868	0.325233
	453.084	4.6861	5.78634	6.59695	5.79606	6.62937			1.553	2.06227	2.80124	1.66877	2.8672			0.332589	0.206482	0.386665	0.332744	0.290036		453.084	1.40356	1.45563	1.30958	1.46002	1.56201			0.580906	0.891684	1.45662	0.722797	1.53135			0.231707	0.21975	0.307204	0.216026	0.325405
	457.615	4.73093	5.78285	6.60345	5.79605	6.6292			1.6515	2.20734	2.9686	1.66986	2.86662			0.344196	0.232148	0.457119	0.333635	0.290212		457.615	1.49754	1.40376	1.42493	1.46002	1.56201			0.719936	0.883318	1.50504	0.723708	1.53132			0.231111	0.233083	0.329482	0.216182	0.325573
	462.191	4.55559	5.72592	6.51974	5.79605	6.62905			1.6544	2.09664	2.87771	1.67092	2.86606			0.365169	0.260916	0.347273	0.334517	0.290384		462.191	1.43201	1.26591	1.65856	1.46001	1.56201			0.659382	0.778057	1.35389	0.724604	1.5313			0.170827	0.374603	0.127127	0.216335	0.325736
	466.813	4.67019	5.77235	6.51547	5.79604	6.6289			1.68005	2.00697	2.84073	1.67195	2.86552			0.281859	0.253416	0.288401	0.335389	0.29055		466.813	1.55905	1.38386	1.50548	1.46001	1.56201			0.66484	0.818037	1.56953	0.725484	1.53128			0.22686	0.294178	0.24139	0.216486	0.325895
	471.481	4.62919	5.7328	6.37483	5.79604	6.62877			1.72113	2.12409	2.92522	1.67295	2.86499			0.344683	0.277017	0.397017	0.336251	0.290713		471.481	1.36836	1.43084	1.51324	1.46001	1.56201			0.681658	0.803691	1.42081	0.726349	1.53125			0.251315	0.358837	0.344725	0.216634	0.326049
	476.196	4.65677	5.78498	6.61547	5.79603	6.62864			1.66234	2.06757	2.86346	1.67392	2.86448			0.306526	0.265068	0.479573	0.337103	0.290871		476.196	1.5136	1.42829	1.4616	1.46001	1.56201			0.698518	0.74877	1.58043	0.727198	1.53124			0.230322	0.543589	0.410758	0.21678	0.326199
	480.958	4.66668	5.73552	6.45006	5.79603	6.62852			1.61267	2.08219	2.85474	1.67486	2.86399			0.315222	0.257994	0.46459	0.337945	0.291024		480.958	1.53508	1.47248	1.51108	1.46001	1.56201			0.725235	0.919801	1.70448	0.728032	1.53122			0.123796	0.324488	0.339514	0.216923	0.326344
	485.767	4.60892	5.6914	6.45743	5.79603	6.62841			1.57646	2.17297	2.94546	1.67578	2.86352			0.3712	0.218056	0.458679	0.338777	0.291174		485.767	1.45982	1.39666	1.52952	1.46001	1.56201			0.715288	0.820899	1.53873	0.728851	1.5312			0.316458	0.318396	0.452655	0.217063	0.326486
	490.625	4.57593	5.65224	6.43138	5.79602	6.6283			1.66031	2.17594	2.92879	1.67667	2.86306			0.293704	0.33801	0.425686	0.339598	0.291319		490.625	1.51982	1.48423	1.49913	1.46001	1.56201			0.63578	0.852871	1.41464	0.729654	1.53118			0.160134	0.23616	0.268381	0.217201	0.326623
	495.531	4.6607	5.83043	6.64596	5.79602	6.6282			1.63776	1.99994	2.85764	1.67753	2.86261			0.242919	0.307646	0.363631	0.34041	0.29146		495.531	1.52479	1.41695	1.47271	1.46001	1.562			0.789138	0.885823	1.62227	0.730442	1.53117			0.279646	0.324424	0.177827	0.217337	0.326756
	500.487	4.53132	5.76056	6.49671	5.79602	6.62811			1.61456	2.04682	2.84122	1.67836	2.86219			0.297436	0.274277	0.406172	0.341211	0.291597		500.487	1.54201	1.3805	1.34369	1.46001	1.562			0.697867	0.749024	1.59822	0.731215	1.53116			0.189676	0.215515	0.465245	0.21747	0.326886
	505.491	4.76172	5.72281	6.56189	5.79602	6.62803			1.6906	2.06665	2.79943	1.67917	2.86177			0.299131	0.332554	0.358808	0.342002	0.29173		505.491	1.53909	1.4636	1.61836	1.46	1.562			0.618862	0.918864	1.49656	0.731972	1.53114			0.220284	0.335516	0.15569	0.2176	0.327011
	510.546	4.76008	5.66158	6.49925	5.79601	6.62795			1.69606	2.13075	2.87775	1.67995	2.86138			0.404594	0.319598	0.367483	0.342783	0.291859		510.546	1.50335	1.38517	1.46558	1.46	1.562			0.673879	0.771101	1.76128	0.732715	1.53113			0.260376	0.299575	0.453961	0.217728	0.327132
	515.652	4.51256	5.70417	6.52633	5.79601	6.62787			1.76125	2.16533	2.84323	1.68071	2.86099			0.356536	0.2208	0.42038	0.343553	0.291984		515.652	1.45995	1.49579	1.52404	1.46	1.562			0.705559	0.907159	1.45929	0.733443	1.53112			0.388943	0.314255	0.37138	0.217853	0.32725
	520.808	4.58375	5.6815	6.47349	5.79601	6.6278			1.68952	2.15701	2.85878	1.68144	2.86062			0.292303	0.284849	0.389739	0.344313	0.292105		520.808	1.50412	1.48821	1.5457	1.46	1.562			0.733524	0.978854	1.59883	0.734156	1.53111			0.152337	0.351634	0.130831	0.217976	0.327364
	526.016	4.92755	5.81154	6.45514	5.79601	6.62774			1.64117	2.05663	2.82471	1.68215	2.86027			0.341886	0.265316	0.364437	0.345062	0.292223		526.016	1.5596	1.37889	1.65558	1.46	1.562			0.691153	0.858538	1.46222	0.734854	1.5311			0.265864	0.334692	0.397545	0.218096	0.327474
	531.277	4.67156	5.79088	6.48969	5.79601	6.62768			1.6122	2.13884	2.84815	1.68283	2.85992			0.255751	0.38256	0.427794	0.345801	0.292337		531.277	1.51706	1.54059	1.51911	1.46	1.562			0.651153	0.837645	1.59576	0.735537	1.53109			0.401724	0.232829	0.246064	0.218214	0.327581
	536.589	4.58618	5.68089	6.51795	5.79601	6.62763			1.64866	2.07035	2.89804	1.68349	2.85959			0.372513	0.347818	0.371721	0.34653	0.292447		536.589	1.47809	1.37496	1.49042	1.46	1.562			0.618009	0.833274	1.50382	0.736206	1.53108			0.194875	0.329921	0.302492	0.21833	0.327684
	541.955	4.7234	5.76211	6.46361	5.79601	6.62757			1.66852	2.05646	2.8357	1.68413	2.85928			0.312189	0.287672	0.425347	0.347248	0.292554		541.955	1.45316	1.52143	1.39841	1.46	1.562			0.709259	0.955945	1.47296	0.736861	1.53108			0.199212	0.448539	0.309481	0.218443	0.327784
	547.375	4.61717	5.61424	6.44117	5.79601	6.62753			1.6524	2.07279	2.90129	1.68475	2.85897			0.408297	0.332995	0.380889	0.347955	0.292657		547.375	1.44611	1.43892	1.58551	1.46	1.562			0.720719	0.86127	1.45708	0.737501	1.53107			0.221141	0.37544	0.139791	0.218554	0.32788
	552.849	4.71521	5.65296	6.34906	5.79601	6.62748			1.61284	2.12769	2.92601	1.68534	2.85868			0.264515	0.256639	0.37757	0.348652	0.292757		552.849	1.59068	1.48992	1.5767	1.46	1.562			0.717683	0.826512	1.44902	0.738126	1.53106			0.238009	0.402862	0.316429	0.218662	0.327973
	558.377	4.7286	5.63558	6.41287	5.796	6.62744			1.63206	2.16354	2.89899	1.68592	2.8584			0.356531	0.244785	0.386573	0.349338	0.292854		558.377	1.45017	1.35161	1.58561	1.46	1.562			0.671116	0.892041	1.4491	0.738738	1.53106			0.146278	0.345226	0.154208	0.218768	0.328063
	563.961	4.71269	5.65227	6.44312	5.796	6.6274			1.63811	2.09159	2.77166	1.68647	2.85813			0.365777	0.228021	0.412159	0.350013	0.292947		563.961	1.48557	1.32953	1.55509	1.46	1.562			0.699867	0.98711	1.46878	0.739336	1.53105			0.225073	0.375007	0.268468	0.218872	0.32815
	569.6	4.54005	5.77529	6.53924	5.796	6.62737			1.74528	2.02376	2.84941	1.687	2.85787			0.427054	0.269968	0.496271	0.350678	0.293037		569.6	1.46197	1.35145	1.5603	1.46	1.562			0.753286	0.85702	1.58521	0.73992	1.53105			0.321387	0.403543	0.265381	0.218973	0.328233
	575.296	4.60687	5.50625	6.41896	5.796	6.62734			1.69525	2.00962	2.8316	1.68752	2.85762			0.38588	0.287655	0.375568	0.351332	0.293124		575.296	1.50125	1.4163	1.57855	1.46	1.562			0.777421	0.984101	1.41189	0.74049	1.53104			0.0499337	0.3766	0.316193	0.219072	0.328314
	581.049	4.60626	5.61544	6.55391	5.796	6.62731			1.69016	2.25413	2.88642	1.68801	2.85738			0.369758	0.323737	0.421537	0.351976	0.293208		581.049	1.61238	1.47211	1.56533	1.46	1.562			0.752198	0.851924	1.5825	0.741046	1.53104			0.17495	0.401158	0.385016	0.219169	0.328392
	586.86	4.73071	5.7352	6.50946	5.796	6.62728			1.70344	2.05538	2.83821	1.68848	2.85715			0.305818	0.397112	0.449814	0.352609	0.293289		586.86	1.48531	1.3971	1.46894	1.46	1.562			0.750339	0.915118	1.57981	0.741589	1.53104			0.242355	0.262865	0.509676	0.219263	0.328467
	592.728	4.70243	5.58336	6.47859	5.796	6.62726			1.70958	2.1699	2.80958	1.68894	2.85694			0.394862	0.259382	0.430485	0.353231	0.293367		592.728	1.51123	1.39115	1.48658	1.46	1.562			0.70211	0.885742	1.59385	0.742119	1.53103			0.253731	0.360297	0.331204	0.219355	0.328539
	598.656	4.71228	5.65606	6.40595	5.796	6.62723			1.73843	2.12119	2.79283	1.68938	2.85673			0.219651	0.283807	0.49527	0.353843	0.293442		598.656	1.51062	1.42412	1.4438	1.46	1.562			0.789291	0.77554	1.37346	0.742635	1.53103			0.20464	0.331042	0.217192	0.219445	0.328608
	604.642	4.71968	5.68407	6.37726	5.796	6.62721			1.66604	2.12048	2.73377	1.6898	2.85653			0.402582	0.264198	0.489216	0.354444	0.293515		604.642	1.50168	1.43106	1.54565	1.46	1.562			0.71181	0.831993	1.49057	0.743139	1.53103			0.173982	0.332863	0.402209	0.219533	0.328675
	610.689	4.62202	5.69073	6.584	5.796	6.62719			1.7122	2.13705	2.74883	1.69021	2.85634			0.389536	0.337028	0.418227	0.355035	0.293585		610.689	1.53481	1.40655	1.4269	1.46	1.562			0.782151	1.0413	1.54647	0.743629	1.53102			0.242996	0.297778	0.434409	0.219618	0.328739
	616.796	4.70991	5.65309	6.58509	5.796	6.62717			1.74178	2.24173	2.774	1.6906	2.85615			0.425726	0.268586	0.355507	0.355615	0.293652		616.796	1.45118	1.42269	1.47094	1.46	1.562			0.762648	0.956456	1.4761	0.744107	1.53102			0.165497	0.214377	0.384061	0.219702	0.328801
	622.964	4.68902	5.64781	6.4519	5.796	6.62716			1.76077	2.17677	2.80315	1.69097	2.85598			0.519903	0.236679	0.414334	0.356185	0.293717		622.964	1.49907	1.46004	1.54468	1.46	1.562			0.656047	0.864038	1.47107	0.744573	1.53102			0.138795	0.380773	0.358661	0.219783	0.32886
	629.193	4.71062	5.57395	6.4772	5.796	6.62714			1.67243	1.96321	2.75113	1.69133	2.85581			0.33054	0.277019	0.386059	0.356744	0.293779		629.193	1.44139	1.36026	1.61725	1.46	1.562			0.669859	0.849272	1.4703	0.745025	1.53102			0.213618	0.315028	0.391764	0.219862	0.328917
	635.485	4.66565	5.70471	6.4824	5.796	6.62713			1.65054	2.13425	2.79269	1.69167	2.85566			0.336821	0.240036	0.50533	0.357293	0.293838		635.485	1.42998	1.36474	1.52074	1.46	1.562			0.783006	0.944314	1.45232	0.745466	1.53102			0.216227	0.292166	0.400336	0.219939	0.328971
	641.84	4.76097	5.70364	6.51939	5.796	6.62712			1.72283	2.2016	2.77428	1.692	2.85551			0.4277	0.359324	0.388953	0.357831	0.293896		641.84	1.46883	1.48374	1.54444	1.46	1.562			0.832168	0.782338	1.51358	0.745895	1.53101			0.410834	0.384533	0.194514	0.220014	0.329023
	648.258	4.66433	5.66139	6.55808	5.796	6.62711			1.57419	2.14871	2.84672	1.69231	2.85536			0.278228	0.330513	0.412943	0.35836	0.293951		648.258	1.48931	1.41691	1.44518	1.46	1.562			0.7397	0.827108	1.43759	0.746312	1.53101			0.152853	0.430882	0.339836	0.220087	0.329073
	654.741	4.81679	5.63819	6.52001	5.796	6.6271			1.68792	2.11195	2.80049	1.69262	2.85523			0.45516	0.291693	0.415479	0.358877	0.294003		654.741	1.4981	1.48157	1.59023	1.46	1.562			0.643271	0.917137	1.56665	0.746717	1.53101			0.171554	0.369193	0.183375	0.220158	0.329121
	661.288	4.78924	5.6661	6.59947	5.796	6.62709			1.69319	2.06847	2.83301	1.6929	2.8551			0.311101	0.321245	0.332573	0.359385	0.294054		661.288	1.63355	1.43078	1.39766	1.46	1.562			0.70289	0.90477	1.52514	0.74711	1.53101			0.320636	0.357159	0.302942	0.220227	0.329167
	667.901	4.78804	5.62201	6.55065	5.796	6.62708			1.62001	2.24254	2.81521	1.69318	2.85497			0.297034	0.289873	0.425776	0.359882	0.294103		667.901	1.44225	1.45484	1.42147	1.46	1.562			0.655929	0.935278	1.45276	0.747492	1.53101			0.285913	0.2842	0.485653	0.220294	0.329211
	674.58	4.82971	5.60644	6.43262	5.796	6.62707			1.65658	2.262	2.72382	1.69344	2.85485			0.444574	0.257827	0.468852	0.360369	0.294149		674.58	1.51834	1.42422	1.38942	1.46	1.562			0.601403	0.796384	1.61111	0.747863	1.53101			0.157584	0.350437	0.391178	0.220359	0.329253
	681.326	4.79897	5.73059	6.48929	5.796	6.62706			1.67948	2.01414	2.78266	1.69369	2.85474			0.312314	0.277151	0.394043	0.360847	0.294194		681.326	1.52371	1.47035	1.51512	1.46	1.562			0.778316	0.756301	1.54848	0.748223	1.53101			0.230062	0.339812	0.416318	0.220423	0.329294
	688.139	4.65676	5.50852	6.40758	5.796	6.62706			1.78906	2.12367	2.73357	1.69393	2.85464			0.389765	0.241701	0.31075	0.361314	0.294236		688.139	1.51425	1.3717	1.53527	1.46	1.562			0.700106	0.935462	1.5019	0.748573	1.53101			0.36385	0.281911	0.301603	0.220484	0.329332
	695.021	4.53834	5.67411	6.43737	5.796	6.62705			1.69596	2.23499	2.70419	1.69416	2.85454			0.253392	0.308005	0.437229	0.361771	0.294277		695.021	1.42035	1.35782	1.49047	1.46	1.562			0.828545	0.837082	1.60667	0.748911	1.53101			0.273521	0.386379	0.390603	0.220544	0.329369
	701.971	4.73528	5.58034	6.55904	5.796	6.62704			1.63442	2.13277	2.77819	1.69438	2.85444			0.338019	0.303113	0.396604	0.362218	0.294316		701.971	1.52946	1.47892	1.49152	1.46	1.562			0.661211	1.06049	1.52173	0.749239	1.53101			0.394491	0.320688	0.19123	0.220602	0.329404
	708.991	4.76049	5.656	6.4526	5.796	6.62704			1.63116	2.04938	2.80417	1.69458	2.85435			0.269228	0.335515	0.317956	0.362656	0.294353		708.991	1.5306	1.43259	1.41938	1.46	1.562			0.589184	0.873392	1.46347	0.749557	1.531			0.334725	0.342442	0.292568	0.220658	0.329437
	716.081	4.7931	5.68458	6.50324	5.796	6.62704			1.71913	2.14915	2.87088	1.69478	2.85427			0.390871	0.433542	0.39419	0.363083	0.294388		716.081	1.53122	1.43769	1.55734	1.46	1.562			0.623111	0.841394	1.46855	0.749865	1.531			0.163444	0.258544	0.269832	0.220712	0.329469
	723.241	4.65581	5.58097	6.33904	5.796	6.62703			1.59559	2.10264	2.86491	1.69497	2.85419			0.292177	0.322223	0.359379	0.363502	0.294422		723.241	1.48293	1.43673	1.35536	1.46	1.562			0.591004	0.748582	1.40568	0.750163	1.531			0.243323	0.412819	0.464457	0.220765	0.329499
	730.474	4.7103	5.61331	6.38879	5.796	6.62703			1.75982	2.1838	2.8732	1.69515	2.85411			0.257752	0.405271	0.377745	0.36391	0.294455		730.474	1.46429	1.44124	1.47071	1.46	1.562			0.727594	0.887875	1.46312	0.750452	1.531			0.385316	0.439298	0.155075	0.220816	0.329528
	737.779	4.70916	5.55175	6.48073	5.796	6.62703			1.6317	2.07122	2.78975	1.69532	2.85404			0.291151	0.324188	0.383604	0.364309	0.294485		737.779	1.47212	1.46465	1.49156	1.46	1.562			0.705396	0.958495	1.54352	0.750731	1.531			0.289804	0.327578	0.249988	0.220865	0.329555
	745.156	4.78171	5.59252	6.4851	5.796	6.62702			1.77372	2.06691	2.79804	1.69548	2.85397			0.349767	0.246154	0.392171	0.364699	0.294515		745.156	1.34765	1.36625	1.41943	1.46	1.562			0.725646	0.931067	1.44343	0.751	1.531			0.372495	0.443875	0.265705	0.220913	0.329582
	752.608	4.75629	5.52733	6.45092	5.796	6.62702			1.75458	2.13485	2.77537	1.69563	2.85391			0.410318	0.245508	0.396763	0.365079	0.294543		752.608	1.38657	1.45082	1.4046	1.46	1.562			0.676321	0.723122	1.36393	0.751261	1.531			0.300641	0.295515	0.32912	0.220959	0.329606
	760.134	4.69383	5.65936	6.35578	5.796	6.62702			1.63595	2.03026	2.73258	1.69578	2.85384			0.323034	0.253113	0.395287	0.365451	0.294569		760.134	1.5353	1.46195	1.42748	1.46	1.562			0.743646	0.927778	1.50914	0.751513	1.531			0.31183	0.394146	0.423798	0.221004	0.32963
	767.735	4.69015	5.52454	6.38567	5.796	6.62702			1.6917	2.10098	2.79586	1.69591	2.85379			0.40325	0.235506	0.393265	0.365813	0.294595		767.735	1.48328	1.33612	1.49587	1.46	1.562			0.745251	0.870698	1.54964	0.751756	1.531			0.173232	0.349914	0.542827	0.221047	0.329652
	775.413	4.7016	5.50534	6.35109	5.796	6.62701			1.74581	2.16306	2.70824	1.69604	2.85373			0.336826	0.334739	0.346011	0.366166	0.294619		775.413	1.46905	1.37453	1.57983	1.46	1.562			0.761945	0.82874	1.43532	0.75199	1.531			0.280038	0.380587	0.376278	0.221089	0.329673
	783.167	4.77355	5.50689	6.37386	5.796	6.62701			1.72015	2.19099	2.76831	1.69617	2.85368			0.345449	0.192933	0.362327	0.36651	0.294642		783.167	1.58025	1.47133	1.39149	1.46	1.562			0.784521	0.82261	1.66148	0.752216	1.531			0.162812	0.426792	0.318221	0.221129	0.329694
	790.998	4.66663	5.53987	6.28666	5.796	6.62701			1.74406	2.09689	2.74214	1.69628	2.85364			0.433469	0.382117	0.370172	0.366846	0.294663		790.998	1.36714	1.38944	1.38283	1.46	1.562			0.755397	0.754598	1.44843	0.752435	1.531			0.291682	0.378333	0.367465	0.221168	0.329713
	798.908	4.76349	5.50478	6.43956	5.796	6.62701			1.65568	2.21416	2.79864	1.69639	2.85359			0.284016	0.220402	0.410254	0.367173	0.294684		798.908	1.5535	1.44112	1.5206	1.46	1.562			0.693159	0.849786	1.41937	0.752645	1.531			0.366355	0.434751	0.345544	0.221206	0.329731
	806.898	4.84444	5.57792	6.37904	5.796	6.62701			1.64389	2.22029	2.69236	1.6965	2.85355			0.270816	0.385442	0.351745	0.367491	0.294703		806.898	1.4313	1.34258	1.39406	1.46	1.562			0.675331	0.917273	1.47088	0.752847	1.531			0.144703	0.30983	0.333323	0.221242	0.329748
	814.967	4.86271	5.58653	6.47121	5.796	6.62701			1.78496	2.18805	2.73332	1.6966	2.85351			0.445701	0.215561	0.451839	0.3678	0.294722		814.967	1.47155	1.4457	1.48943	1.46	1.562			0.710733	0.95695	1.42575	0.753042	1.531			0.289715	0.390122	0.190245	0.221277	0.329764
	823.116	4.75814	5.50037	6.41256	5.796	6.62701			1.77224	2.2582	2.7564	1.69669	2.85347			0.466078	0.372678	0.419856	0.368102	0.294739		823.116	1.43356	1.45012	1.4489	1.46	1.562			0.796491	0.758206	1.5383	0.75323	1.531			0.417176	0.539353	0.376395	0.22131	0.329779
	831.347	4.83086	5.5928	6.49414	5.796	6.62701			1.7462	1.9611	2.72355	1.69678	2.85344			0.260848	0.326311	0.409292	0.368395	0.294756		831.347	1.49378	1.46994	1.42895	1.46	1.562			0.716364	0.830999	1.53009	0.75341	1.531			0.203888	0.369981	0.321379	0.221343	0.329794
	839.661	4.78727	5.44787	6.4358	5.796	6.627			1.77855	2.13091	2.69183	1.69686	2.85341			0.378979	0.310485	0.360469	0.36868	0.294771		839.661	1.50148	1.39025	1.496	1.46	1.562			0.712385	0.818678	1.5647	0.753584	1.531			0.224494	0.344974	0.260804	0.221374	0.329807
	848.057	4.76097	5.53654	6.49095	5.796	6.627			1.71865	2.08365	2.78363	1.69694	2.85338			0.281169	0.275955	0.457806	0.368957	0.294786		848.057	1.49141	1.48136	1.49569	1.46	1.562			0.632233	0.855773	1.42597	0.753751	1.531			0.152712	0.37806	0.346365	0.221404	0.32982
	856.538	4.67986	5.55507	6.49314	5.796	6.627			1.71793	2.18255	2.70685	1.69701	2.85335			0.283101	0.219357	0.383046	0.369226	0.2948		856.538	1.43115	1.44733	1.42366	1.46	1.562			0.726045	0.911312	1.56626	0.753911	1.531			0.166571	0.301507	0.380198	0.221432	0.329832
	865.103	4.6547	5.52146	6.49238	5.796	6.627			1.85166	2.08578	2.7386	1.69708	2.85332			0.387956	0.306206	0.420749	0.369488	0.294813		865.103	1.66881	1.39348	1.56068	1.46	1.562			0.723791	0.824555	1.52824	0.754064	1.531			0.281998	0.398063	0.396807	0.22146	0.329844
	873.754	4.76685	5.56583	6.44809	5.796	6.627			1.73365	2.09068	2.75903	1.69714	2.8533			0.425422	0.312874	0.455	0.369742	0.294826		873.754	1.47353	1.5096	1.56092	1.46	1.562			0.685712	0.767826	1.36312	0.754212	1.531			0.311331	0.249156	0.341675	0.221487	0.329854
	882.492	4.80798	5.52984	6.53499	5.796	6.627			1.71012	2.1874	2.71758	1.6972	2.85327			0.336317	0.328725	0.284814	0.369988	0.294837		882.492	1.44524	1.43019	1.58286	1.46	1.562			0.719682	0.862026	1.4593	0.754353	1.531			0.166934	0.359863	0.428329	0.221512	0.329864
	891.317	4.84255	5.44958	6.43222	5.796	6.627			1.78219	2.09181	2.74124	1.69726	2.85325			0.395328	0.334762	0.562313	0.370227	0.294848		891.317	1.49004	1.47075	1.57653	1.46	1.562			0.635165	0.861311	1.54519	0.754489	1.531			0.249892	0.307213	0.246049	0.221537	0.329874
	900.23	4.74723	5.41938	6.56278	5.796	6.627			1.73548	2.21599	2.78923	1.69731	2.85323			0.300644	0.330968	0.438093	0.370459	0.294859		900.23	1.46448	1.45887	1.35107	1.46	1.562			0.703162	0.941127	1.44417	0.754619	1.531			0.0969179	0.33691	0.332774	0.22156	0.329883
	909.232	4.76262	5.42753	6.33742	5.796	6.627			1.70247	2.10222	2.7379	1.69736	2.85321			0.454828	0.208114	0.419453	0.370683	0.294869		909.232	1.51804	1.41993	1.24725	1.46	1.562			0.705556	0.69768	1.337	0.754743	1.531			0.0640074	0.386915	0.334153	0.221583	0.329891
	918.325	4.74764	5.33267	6.4095	5.796	6.627			1.82107	2.14034	2.80822	1.69741	2.8532			0.307484	0.286763	0.461298	0.370901	0.294878		918.325	1.36098	1.42728	1.43518	1.46	1.562			0.610827	0.810396	1.55144	0.754862	1.531			0.105462	0.312045	0.229547	0.221604	0.329899
	927.508	4.67528	5.45843	6.42259	5.796	6.627			1.75309	2.158	2.80397	1.69745	2.85318			0.312611	0.391044	0.473598	0.371112	0.294886		927.508	1.44323	1.32021	1.46721	1.46	1.562			0.780376	0.850763	1.42821	0.754976	1.531			0.262815	0.33105	0.238589	0.221625	0.329906
	936.783	4.73942	5.41126	6.39615	5.796	6.627			1.68452	2.11232	2.70761	1.69749	2.85317			0.378503	0.264698	0.412206	0.371316	0.294894		936.783	1.51549	1.34578	1.53498	1.46	1.562			0.641211	0.788956	1.64306	0.755085	1.531			0.237816	0.420102	0.279507	0.221645	0.329913
	946.151	4.87065	5.4159	6.3019	5.796	6.627			1.79111	2.07933	2.73192	1.69753	2.85315			0.430198	0.362956	0.306573	0.371513	0.294902		946.151	1.45288	1.41154	1.30331	1.46	1.562			0.727028	1.02726	1.45344	0.755189	1.531			0.193759	0.360493	0.222399	0.221664	0.32992
		1.31577	5.49577	6.51636	5.796	6.627																955.612	0.697094	1.44195	1.51561	1.46	1.562							1.531			0	0	0.173189	0.221682	0.329926
		1.26347	5.50559	6.4292	5.796	6.627																965.168	0.713975	1.45349	1.2385	1.46	1.562							1.531			0	0	0.187656	0.221699	0.329931
		1.26367	5.44433	6.37828	5.796	6.627																974.82	0.691573	1.47536	1.44029	1.46	1.562							1.531			0	0	0.182555	0.221715	0.329936
		1.2824	5.41436	6.395	5.796	6.627																984.568	0.726053	1.40328	1.3582	1.46	1.562							1.531			0	0	0.236814	0.221731	0.329941
		1.27446	5.51032	6.49603																		994.414	0.73759	1.4306	1.53833	1.46	1.562							1.531			0	0	0.163177	0.221746	0.329946
